# Supplementary material for: Evolving landscape of stroke prevention in atrial fibrillation within the UK between 2012 and 2016: a cross-sectional analysis study using CPRD
Source: PubMed Central journal article supplement — BMJ Open. 2017 Sep 25;7(9):e015363. doi: 10.1136/bmjopen-2016-015363 (PMC5623501; doi:10.1136/bmjopen-2016-015363), 2017-09-25
Supplement: bmjopen-2016-015363.draft_revisions.pdf [file bmjopen-2016-015363.draft_revisions.pdf]

# BMJ Open

## The evolving landscape of stroke prevention in atrial fibrillation within the United Kingdom between 2012 and 2016

|                                 |                                                                                                                                                                                                                                                                                                                                                                                                                                                                                                                                                                           |
|---------------------------------|---------------------------------------------------------------------------------------------------------------------------------------------------------------------------------------------------------------------------------------------------------------------------------------------------------------------------------------------------------------------------------------------------------------------------------------------------------------------------------------------------------------------------------------------------------------------------|
| Journal:                        | <i>BMJ Open</i>                                                                                                                                                                                                                                                                                                                                                                                                                                                                                                                                                           |
| Manuscript ID                   | bmjopen-2016-015363                                                                                                                                                                                                                                                                                                                                                                                                                                                                                                                                                       |
| Article Type:                   | Research                                                                                                                                                                                                                                                                                                                                                                                                                                                                                                                                                                  |
| Date Submitted by the Author:   | 01-Dec-2016                                                                                                                                                                                                                                                                                                                                                                                                                                                                                                                                                               |
| Complete List of Authors:       | Lacoin, Laure; Bristol-Myers Squibb<br>Lumley, Matthew; Pfizer<br>Ridha, Essra; Bristol-Myers Squibb<br>Pereira, Marta; Evidera<br>McDonald, Laura; Evidera,<br>Ramagopalan, Sreeram; Evidera<br>Lefèvre, Cinira; Bristol-Myers Squibb France, Worldwide Health Economics & Outcomes Research<br>Evans, David; Bristol-Myers Squibb France, Worldwide Health Economics & Outcomes Research<br>Halcox, Julian; Swansea University College of Medicine, Institute of Life Sciences; Cardiff University School of Medicine, Institute of Molecular and Experimental Medicine |
| <b>Primary Subject Heading</b>: | Cardiovascular medicine                                                                                                                                                                                                                                                                                                                                                                                                                                                                                                                                                   |
| Secondary Subject Heading:      | Epidemiology                                                                                                                                                                                                                                                                                                                                                                                                                                                                                                                                                              |
| Keywords:                       | Atrial fibrillation, Drug therapy, Electronic health records, Great Britain, Stroke < NEUROLOGY                                                                                                                                                                                                                                                                                                                                                                                                                                                                           |
|                                 |                                                                                                                                                                                                                                                                                                                                                                                                                                                                                                                                                                           |

SCHOLARONE™  
Manuscripts

1  
2  
3 **The evolving landscape of stroke prevention in atrial fibrillation within the United Kingdom**  
4 **between 2012 and 2016**

5 L. Lacoïn,\*<sup>1</sup> M. Lumley,† E. Ridha,\* M. Pereira,‡<sup>1</sup> L. McDonald,‡ S. Ramagopalan,‡ C. Lefevre,§ D.  
6 Evans,<sup>1</sup> J. Halcox\*\*

7  
8 \* UK Medical Department, Bristol-Myers Squibb, Uxbridge, UK; † Medical Department, Pfizer,  
9 Tadworth, UK; ‡ Real-World Evidence, Evidera, London, UK; § Center of Observational Research and  
10 Data Sciences, Business Insights and Analytics, Bristol-Myers Squibb, Rueil Malmaison, France;  
11 WWHEOR Market, Bristol-Myers Squibb, Rueil Malmaison, France; \*\* Department of Cardiology,  
12 Swansea University, Cardiff UK

13  
14  
15 <sup>1</sup> Employee at time of the study

16  
17 **Correspondence to:** Professor Julian Halcox, Swansea University, Singleton Park Campus, Sketty,  
18 Swansea SA2 8PP, UK; tel 44 (0)1792 602938; [j.p.j.halcox@swansea.ac.uk](mailto:j.p.j.halcox@swansea.ac.uk)

19  
20 **Short title:** Evolving stroke prevention for NVAf in the UK

21  
22 **Word count:** 4000

23  
24 *"The Corresponding Author has the right to grant on behalf of all authors and does grant on behalf of*  
25 *all authors, [a worldwide licence](#) to the Publishers and its licensees in perpetuity, in all forms, formats*  
26 *and media (whether known now or created in the future), to i) publish, reproduce, distribute, display*  
27 *and store the Contribution, ii) translate the Contribution into other languages, create adaptations,*  
28 *reprints, include within collections and create summaries, extracts and/or, abstracts of the*  
29 *Contribution, iii) create any other derivative work(s) based on the Contribution, iv) to exploit all*  
30 *subsidiary rights in the Contribution, v) the inclusion of electronic links from the Contribution to third*  
31 *party material where-ever it may be located; and, vi) licence any third party to do any or all of the*  
32 *above."*

## ABSTRACT

**Objective:** To describe the changes in prescribing of oral anticoagulant (AC) and antiplatelet (AP) agents in patients with non-valvular atrial fibrillation (NVAF) in the UK and to identify the characteristics associated with deviation from guideline-based recommendations.

**Design:** Five cross-sectional analyses in a large retrospective population-based cohort study.

**Setting:** General practices contributing data to the UK Clinical Practice Research Datalink.

**Participants:** The study included patients with a diagnosis of non-valvular atrial fibrillation (NVAF) and eligible for anticoagulation (CHA2DS2-VASc score  $\geq 2$ ) on 1st April of 2012, 2013, 2014, 2015 and 1st January 2016.

**Results:** The proportion of patients being treated with AC increased at each index date, showing an absolute rise of 16.7% over the study period. At the same time, the proportion of patients treated with an AP alone was reduced by half, showing an absolute decrease of 16.8%. The proportion of patients not receiving any antithrombotic (AT) treatment remained the same across the study period. A number of predictors were identified for AP alone or no treatment compared with AC treatment.

**Conclusion:** Major improvements in the AT management of patients with NVAF for stroke prevention in the UK were observed between April 2012 and January 2016. Despite this, nearly 20% of at-risk patients still received AP alone and over 15% were on no AT agents in January 2016.

## STRENGTHS AND LIMITATIONS

- A large representative population of patients with all forms of AF (paroxysmal, chronic) studied in the 'real-world' using data obtained from GP records in Clinical Research Practice Datalink (CPRD)
- Real-world data are more likely to reflect wider contemporary treatment practices than information obtained from registries
- Although CPRD is regularly and extensively audited to ensure data quality, the study is limited by the accuracy of GP records
- The completeness of the GP record is difficult to ascertain, and we may have not detected some individuals receiving AC prescriptions is secondary care

**Key words:** Atrial Fibrillation, Drug Therapy, Electronic Health Records, Great Britain, Stroke

## INTRODUCTION

Atrial fibrillation (AF) is the most common cardiac arrhythmia,[1] estimated to affect up to 1.4 million people in England,[2] and is an independent risk factor for stroke, increasing the risk five-fold.[3]

Approximately 20% of stroke cases in the United Kingdom (UK) are thought to have AF as a contributing factor and AF-related strokes are more likely to be fatal or cause severe disability than non-AF-related strokes.[4, 5] However, AF-related strokes can be prevented and their impact minimised by effective management strategies including increased detection of AF, adherence to stroke prevention guidelines and anticoagulant (AC) use in at-risk patients.

Although anticoagulation is effective in preventing strokes due to AF, evidence suggests anticoagulation therapy remains underused.[6-12] In 2010, Holt et al. showed that only 50.7% of patients with non-valvular AF (NVAf) at high risk of stroke in the UK were treated with oral AC.[8] Opportunities to impact significantly on an important cause of cardiovascular morbidity and mortality are thereby frequently missed.

In 2012, a focused update of the 2010 European Society of Cardiology (ESC) guidelines for the management of AF was issued.[13] This update included three major changes based on new or strengthened evidence. Firstly, the CHA2DS2-VASc score replaced the CHADS2 score for the assessment of stroke risk. This is based on the accumulated evidence that CHA2DS2-VASc score, which is inclusive of the most common risk factors for stroke[14] and has been validated in multiple cohorts,[15] is better at identifying patients at “truly low risk” of AF-related stroke.[16-19] Secondly, the use of aspirin therapy for stroke prevention in AF was restricted to those patients who refuse oral anticoagulation. Thirdly, the use of non-vitamin K antagonist oral anticoagulants [(NOACs), such as dabigatran, apixaban, and rivaroxaban]) was recommended in preference to vitamin K antagonists (VKAs) in most patients with a CHA2DS2-VASc score  $\geq 1$ . [13]

1  
2  
3 Despite these guidelines and the weight of evidence, national audit data from the UK showed that  
4  
5 among patients with known AF admitted to hospital for stroke between January and March 2013,  
6  
7 38% were taking antiplatelet (AP) drugs alone.[20]  
8  
9

10 In 2014, when the National Institute for Health and Care Excellence (NICE) updated its AF clinical  
11  
12 guidelines (CG180),[21] it recommended that NOACs should be considered as equal first-line options  
13  
14 alongside warfarin for NVAF; furthermore in a significant change to established practice stated that  
15  
16 aspirin should not be used as monotherapy to prevent AF-related stroke. The Royal Colleges  
17  
18 published a Consensus Statement reiterating this advice and emphasising the importance of  
19  
20 ensuring patients are supported to make an informed choice of AC.[22]  
21  
22

23  
24 It is not yet known whether the update of the ESC and NICE guidelines effectively impacted  
25  
26 treatment practices in the UK. Therefore, this study aims to describe the changes in primary care  
27  
28 prescribing of oral AC and AP agents in patients with NVAF eligible for anticoagulation during the  
29  
30 years 2012–2016, and to identify clinical characteristics associated with deviation from guideline-  
31  
32 based recommendations.  
33  
34

## 35 **METHODS**

### 36 **Data Source**

37  
38 Data were obtained from the UK Clinical Practice Research Datalink (CPRD).[23] The CPRD is an  
39  
40 anonymised primary care database established in 1987 to collect longitudinal medical records data  
41  
42 from general practitioner (GP) practices. As of April 2013, the CPRD covered 674 GP practices with  
43  
44 4.4 million active patients (i.e., patients that are alive and registered), reflecting approximately 6.8%  
45  
46 of the UK population. This active sample is representative of the UK population in terms of age, sex,  
47  
48 and ethnicity. The CPRD contains patient registration information as well as events that the GP  
49  
50 records during routine clinical practice, including medical diagnoses, prescriptions issued,  
51  
52  
53  
54  
55  
56  
57  
58  
59  
60

1  
2  
3 anthropometric measurements, diagnostic tests, lifestyle information (e.g., smoking status, alcohol  
4 intake) and referrals to secondary care.  
5  
6

7  
8 The CPRD has broad National Research Ethics Service Committee (NRES) ethics approval for purely  
9 observational research. This study protocol was approved by the MHRA Independent Scientific  
10 Advisory Committee (protocol 14\_245R).  
11  
12  
13

### 14 **Study Population**

15  
16 All patients with a diagnosis of NVAf and eligible for anticoagulation according to ESC 2012[13] and  
17 NICE 2014[21] guidance at index date (CHA2DS2-VASc score  $\geq 2$ ) were included in five cross-sectional  
18 analyses: on 1<sup>st</sup> April of 2012, 2013, 2014, and 2015 and 1<sup>st</sup> January of 2016 (index date for each  
19 year). Patients were further required to be at least 18 years old at the index date, have had at least  
20 one consultation with their GP in the last 12 months, have ongoing CPRD registration, and have at  
21 least 12 months of computerised medical data prior to the index date. Patients were excluded from  
22 the study if they had a valvular condition (e.g., rheumatic mitral or aortic valve disease, or prosthetic  
23 valve; codes used to identify patients are in the data supplement), or if their gender was unknown.  
24  
25 Figure 1 summarises the patient selection process.  
26  
27  
28  
29  
30  
31  
32  
33  
34  
35  
36  
37

### 38 **Study Variables**

39  
40 Exposure to AC was defined by the last anticoagulation prescription identified in the 90-day period  
41 preceding the index date. Three type of regimens were defined: AC, AP alone, or no antithrombotic  
42 (AT) treatment. AC included vitamin K antagonists, apixaban, rivaroxaban, dabigatran, and  
43 parenteral AC. International normalised ratio (INR) measurements were treated as an indicator of  
44 VKA exposure and was therefore used to extend VKA exposure time. Exposure to AP alone was  
45 defined by an absence of AC prescription and the presence of at least one AP prescription in the 90-  
46 day period preceding the index date. No AT was defined by the absence of AC or AP prescription in  
47 the 90-day period preceding the index data.  
48  
49  
50  
51  
52  
53  
54  
55  
56  
57  
58  
59  
60

1  
2  
3 Demographic characteristics included age, gender, and country of residence. Clinical characteristics  
4  
5 were body mass index (BMI), smoking status, time since NVAF diagnosis, stroke risk factors (previous  
6  
7 stroke, transient ischaemic attack [TIA] or other arterial thromboembolism, congestive heart failure  
8  
9 (CHF), coronary artery disease, peripheral artery disease, hypertension, or diabetes mellitus), other  
10  
11 bleeding risk factors (previous bleeds, peptic ulcer, renal disease, liver disease, concomitant  
12  
13 treatment with antiplatelet or nonsteroidal anti-inflammatory drugs, or high alcohol intake), falls,  
14  
15 active cancer (at least one diagnosis related to cancer in the last 12 months) and number of  
16  
17 concomitant treatments (prescribed in the last 90 days). CHA<sub>2</sub>DS<sub>2</sub>-VASc score and a modified HAS-  
18  
19 BLED score (excluding INR component as not consistently reported in CPRD, score range: 0-8) were  
20  
21 calculated for all patients. All clinical diagnoses were identified using READ codes (codes lists  
22  
23 provided in the data supplement). Diabetes and hypertension were also identified using the  
24  
25 prescription of antidiabetic or antihypertensive treatments.  
26  
27

### 28 29 30 **Statistical Analyses**

31  
32 The proportion of patients treated with each regimen (AC, AP alone, or no AT) and their 95%  
33  
34 confidence interval were calculated at each index date. As the CPRD does not provide sample survey  
35  
36 weights, it is only possible to estimate proportions as if the CPRD data is a simple random sample of  
37  
38 approximately 8% of UK GPs/patients, so a finite population correction factor of 0.96 was applied to  
39  
40 the standard errors of proportion estimates (FPFC =  $\sqrt{1-0.08}$  ~0.96).  
41  
42

43  
44 An interrupted time series analysis [24] was conducted to estimate the impact of the updated ESC  
45  
46 guidance (published in August 2012) and NICE 2014 guidance (published in June 2014) on the  
47  
48 evolution of the proportion of patients treated with each regimen, controlling for baseline level and  
49  
50 trend. For this analysis, data from April 2011 to April 2015 were used and month-by-month  
51  
52 estimates were extracted to obtain 50 time-points (using the same inclusion criteria than for the five  
53  
54 main cross-sectional analyses). The time series model was divided into three time periods: (1) pre-  
55  
56 ESC guidelines, (2) post-ESC guidelines, and (3) post-NICE guidelines. The statistical significance of  
57  
58  
59  
60

1  
2  
3 the change in level (i.e., the rapid drop in rates immediately after the intervention) and trend (i.e.,  
4 the gradual decline in rates over the remainder of the follow-up period) were tested for each time  
5 period. The slope in each time period was calculated by summing the change in trend observed in  
6 the time period and the previous slope (in first period (pre-ESC), the baseline trend was equal to the  
7 slope).

8  
9  
10  
11  
12  
13  
14 These analyses of the evolution of the anticoagulation management over time were also run  
15 separately in newly diagnosed patients with NVAF (<12 months) and in patients with NVAF with a  
16 diagnosis for  $\geq 12$  months, as well as in each country of residence separately (England, Scotland,  
17 Wales, and Northern Ireland; results by country provided in the data supplement).

18  
19  
20  
21  
22  
23  
24 Generalised estimating equations (GEE) were used to identify demographic and clinical  
25 characteristics associated with antiplatelet treatment, and with the absence of AT treatment (versus  
26 receiving anticoagulation therapy) in April 2015 (date of the last planned cross-sectional analysis).  
27  
28  
29  
30  
31  
32  
33  
34  
35  
36  
37  
38  
39  
40  
41  
42  
43  
44  
45  
46  
47  
48  
49  
50  
51  
52  
53  
54  
55  
56  
57  
58  
59  
60  
The final models were obtained using a backward elimination until all variables were significantly  
associated with the outcome ( $P < 0.05$ ). Models were adjusted for clustering within individuals and  
within GP practices, and results are given as odds ratios and 95% confidence intervals. All analyses  
were conducted using SAS software version 9.4.

## RESULTS

### Patient Characteristics

The demographic and clinical characteristics of patients with NVAF eligible for anticoagulation according to ESC and NICE guidance ( $\text{CHA}_2\text{DS}_2\text{-VASc} \geq 2$ ) from April 2012 to January 2016 are provided in Table 1. The characteristics of the population were consistent across the study period: patients' mean age was 78 years, 52.4%–54.3% were male, and more than 50% were either overweight or obese. Almost 20% had a history of stroke or TIA, around 30% had a history of



1  
2  
3 coronary artery disease and most had hypertension (>97%). Approximately 12% had been diagnosed  
4  
5 with NVAf within the preceding 12 months (newly diagnosed).  
6  
7

### 8 **Treatment Patterns Over Time**

9  
10 The proportion of patients being treated with AC increased each year, showing an absolute rise of  
11  
12 16.7% over the study period (from 50.2% in April 2012 to 66.9% in January 2016) (Table 2). At the  
13  
14 same time, the proportion of patients treated with an AP alone was reduced by half, showing an  
15  
16 absolute decrease of 16.8% (from 34.2% in April 2012 to 17.4% January 2016). The proportion of  
17  
18 patients not receiving any AT treatment remained the same across the study period, at around 15%  
19  
20 of all patients with NVAf.  
21  
22

23  
24 Stratifying the population by time since diagnosis identified the reduction in the proportion of  
25  
26 patients treated with AP alone was greater in newly diagnosed patients, relative to those who had  
27  
28 been diagnosed for  $\geq 12$  months (26.8% vs. 15.4%). In January 2016, only 11.3% of the newly  
29  
30 diagnosed patients were treated with AP alone (vs 18.3% of those diagnosed  $\geq 12$  months). Similarly,  
31  
32 the increase in the proportion of patients being prescribed AC was greater in those patients who  
33  
34 were newly diagnosed compared to those diagnosed with NVAf for  $\geq 12$  months (25.3% vs. 15.5%).  
35  
36 In January 2016, 72.5% of the newly diagnosed patients were treated with AC (vs. 66.1% of those  
37  
38 diagnosed for  $\geq 12$  months).  
39  
40

41  
42 In newly diagnosed patients, major changes in the type of oral AC prescribed were observed  
43  
44 between April 2014 and January 2016. The proportion of patients initiated with VKA fell from 50.8%  
45  
46 to 31.8% of all patients with NVAf, while the NOAC prescriptions rose from 9.8% to 40.6% (including  
47  
48 16.6% apixaban, 2.4% dabigatran, 21.5% rivaroxaban). No major change was observed in the NVAf  
49  
50 population with a diagnosis for  $\geq 12$  months; VKA prescribed in 50.9% of the population in January  
51  
52 2016 and NOACs in 15% (including 4.5% apixaban, 2.2% dabigatran, 8.3% rivaroxaban).  
53  
54

### 55 **Impact of ESC and NICE Guidelines Publications on UK Practice**

1  
2  
3 The time series analysis stratified by time since NVAf diagnosis (< 12 months or ≥ 12 months)  
4  
5 showed that there was a significant trend for increasing anticoagulation treatment in both patient  
6  
7 groups since April 2011 (Figure 3). However, a significant acceleration of this trend (increase of the  
8  
9 slope) was observed after the updated ESC guidance publication (change in trend:  $\beta=+0.26$  in newly  
10  
11 diagnosed,  $\beta=+0.18$  in patients diagnosed ≥ 12 months) and also after NICE guidance publication  
12  
13 (change in trend:  $\beta=+0.12$  in newly diagnosed,  $\beta=+0.15$  in patients diagnosed ≥ 12 months).  
14  
15

16  
17 Equally, a significant trend for decreasing antiplatelet use was observed since April 2011. A  
18  
19 significant acceleration of this trend was observed after both ESC and NICE guidance publications.  
20  
21 This change in trend was more marked after ESC for the newly diagnosed patients (post ESC:  $\beta=-$   
22  
23 0.26, post-NICE:  $\beta=-0.10$ ) and after NICE for patients diagnosed ≥ 12 months (post-ESC:  $\beta=-0.15$ ,  
24  
25 post-NICE:  $\beta=-0.21$ ).  
26  
27

#### 28 **Characteristics Associated with the Absence of Anticoagulation Therapy in April 2015**

29  
30  
31 Tables 3 and 4 present the results of the GEE models comparing demographic and clinical  
32  
33 characteristics in patients receiving either an AP alone or no AT, versus those receiving AC treatment  
34  
35 in April 2015. Even after adjusting on CHA2DS2-VASc score, females, patients aged <65 and ≥85 (vs.  
36  
37 patients 65-74 years) were more likely to be prescribed an AP alone or no AT treatment, whereas  
38  
39 patients with a history of stroke/TIA, CHF or hypertension were less likely to remain untreated. The  
40  
41 likelihood of being treated with AP alone increased with time since diagnosis. Patients with coronary  
42  
43 and peripheral artery disease were also more likely to be treated with an AP alone than AC.  
44  
45 Importantly, CHA2DS2-VASc was associated with the absence of AT treatment, patients with a score  
46  
47 ≥3 were less likely to remain untreated than patients with a CHA2DS2-VASc score=2. To less extent,  
48  
49 the same association was observed in patients treated with AP alone (vs. AC). Patients who had a  
50  
51 previous intracranial bleed were more likely to be treated with AP and even more likely to remain  
52  
53 untreated. The absence of any AT was more frequent in patients with less than five  
54  
55  
56  
57  
58  
59  
60

1  
2  
3 comedications. Geographic variations were observed, with a higher proportion receiving AP alone or  
4  
5 no AT in England and Scotland compared to Wales and Northern Ireland.  
6  
7

## 8 **DISCUSSION**

9  
10 A pronounced shift in anticoagulation management of patients with NVAF was observed in the UK  
11  
12 between April 2012 and January 2016, coinciding with the update of ESC[13] and NICE[21] guidelines  
13  
14 and with the availability of the NOACs as an alternative to VKAs. A substantial increase in the  
15  
16 proportion of patients with NVAF at risk of stroke treated with AC was observed during this time  
17  
18 (from 50.2% to 66.9%), as well as an important decrease of AP use (34.2% to 17.4%).  
19  
20  
21

22  
23 Whereas important increases in the proportion of patients with NVAF treated with AC were  
24  
25 previously described in the UK between 1994-2003,[6, 7] no significant changes were observed in  
26  
27 the years 2007–2010 in patients with CHA<sub>2</sub>DS<sub>2</sub>-VASc  $\geq 2$ , with AC use remaining low (around 50%)  
28  
29 and AP alone widely used (36%). The high use of AP until March 2012 may have also partly reflected  
30  
31 the recommendations of the Quality and Outcomes Framework (QOF) of the NHS (National Health  
32  
33 Service), which provided equal emphasis on AC and AP in stroke prevention in primary care at that  
34  
35 time.[12]  
36  
37

38  
39 The observed shift in treatment patterns in this study suggests a positive impact of both the ESC[13]  
40  
41 and NICE[21] guidelines in driving changes in thrombopropylaxis strategy for NVAF patients in the  
42  
43 UK, most notably the move away from AP use. The release of the ESC guidance appeared to impact  
44  
45 more significantly the management of recently diagnosed patients. This may reflect an earlier  
46  
47 change in the practice of cardiologists who, in the UK, are typically more involved in the diagnosis  
48  
49 and initial management of NVAF. Indeed, the publication of the NICE guidance had a greater impact  
50  
51 on the decline in AP use among patients with a pre-existing diagnosis, which might reflect the higher  
52  
53 impact of local guidance on GP's who are more involved in the long-term management of patients.  
54  
55  
56  
57  
58  
59  
60

1  
2  
3 Overall, the most marked improvement in stroke prevention in AF occurred in newly diagnosed  
4 patients, in whom AC prescriptions rose from 47.2% to 72.5% and the use of AP alone dropped to  
5 11.3% in January 2016. At the time of diagnosis, patients are likely to be particularly engaged with  
6 their condition, more likely to be booked for further clinical assessment and physicians are obligated  
7 to make a decision regarding AC. Conversely, patients with a longstanding diagnosis may be more  
8 resistant to changes in their treatment regimen, and thromboembolism prophylaxis may not be the  
9 focus of clinical appointments. As newly diagnosed patients represent only 20% of the NVAF  
10 population, this emphasises the potential impact on stroke prevention in the UK that could be  
11 achieved by effectively addressing thromboembolism prophylaxis strategy in patients with an  
12 established NVAF diagnosis. Ongoing educational activity and the use of specialist nurses and  
13 pharmacist led anticoagulation clinics will play an important role in reaching this group of patients.  
14  
15

16  
17  
18  
19  
20  
21  
22  
23  
24  
25  
26  
27 Importantly, the trend for increasing use of AC between 2012 and 2016 was associated with the  
28 growing use of NOAC's (apixaban, rivaroxaban, dabigatran). This growth of NOAC use was mainly  
29 observed in newly diagnosed patients between 2014 and 2016, associated with a decrease of VKA  
30 initiation, and coincided with the release of NICE guidance[21] and the Consensus Statement  
31 reiterating that NICE-approved treatments have to be made available for prescribing. This highlights  
32 the vital role of the NOACs as alternatives to VKA through addressing some of the limitations of VKA  
33 therapy and responding to individual patient needs. However, no major changes in the type of AC  
34 received by patients with NVAF with a diagnosis  $\geq 12$  months was observed.  
35  
36  
37  
38  
39  
40  
41  
42  
43  
44

45  
46 Although these data show that anticoagulation treatment patterns in NVAF have improved  
47 substantially over the last five years, rates of anticoagulation appear to lag behind those observed in  
48 contemporary European cohorts. For example, at the two-year follow up of the EORP-AF registry in  
49 2015, 79.2% of AF patients were identified as receiving at least one oral AC (compared to 62.9% in  
50 2015 in this study, Table 2).[25] Rates of NOAC use however appear more comparable, with 13.7% of  
51 patients in EORP-AF receiving at least one NOAC (compared to 10.9% in this study in 2015). Baseline  
52  
53  
54  
55  
56  
57  
58  
59  
60

1  
2  
3 data from the European population of the GLORIA-AF registry, which includes only newly diagnosed  
4  
5 AF patients, showed the majority (52.4%) were treated with NOACs, while 5.7 % received AP  
6  
7 therapy, and only 4.1% remained untreated.[26] These data are comparable to the 9.8% receiving  
8  
9 NOACs, 23.8% AP therapy, and 15.2% untreated among patients diagnosed between 2013 and 2014  
10  
11 in our study (Figure 2). Similarly, in the global GARFIELD-AF registry of patients with very recently  
12  
13 diagnosed NVAF (<6 weeks), over the period from 2010/11 to 2014/15 the proportion of patients  
14  
15 treated with AC increased from 57.4% to 71.1% including a significant increase in the proportion  
16  
17 receiving NOACs (4.2%–37.0%), whilst AP monotherapy declined from 30.2% to 16.6%.[27] It is  
18  
19 encouraging that our data up to January 2016 continue to show anticoagulation use is increasing in  
20  
21 the UK. Differences with European-based cohorts may, therefore, reflect a time lag associated with  
22  
23 the later release of NICE guidance in 2014[21] relative to the ESC guidance in 2012.[13] Other factors  
24  
25 may also be involved.  
26  
27

28  
29 Whereas the striking decrease of AP use observed in this study is encouraging, the absence of any  
30  
31 changes in the proportion of patients remaining untreated raises some concerns. These current data  
32  
33 identify patient characteristics associated with remaining untreated. Younger patients (<65 years),  
34  
35 patients taking fewer prescription medications (<5), and those with a CHA2DS2-VASc score of 2 were  
36  
37 all more likely to remain untreated. We hypothesise that this could be secondary to a misperception  
38  
39 of stroke risk by clinicians but it may also be secondary to patient attitude. Furthermore for those  
40  
41 patients <65 years of age, the monitoring requirements of VKAs may be regarded as incompatible  
42  
43 with a working life; a barrier that could be overcome with the NOACs.  
44  
45

46  
47 At the other end of the spectrum, elderly patients (>85 years) were found to be less likely to be  
48  
49 prescribed AC therapy and more likely to be treated with AP alone. This observation is well  
50  
51 documented[7, 11, 12, 28-32] and may be secondary to an overestimation of bleeding risk despite  
52  
53 unequivocal evidence of the benefits of AC in the elderly.[33-36]  
54  
55  
56  
57  
58  
59  
60

1  
2  
3 Our findings clearly illustrate the risk-treatment paradox previously reported in AF management [11]  
4 that patients at higher risk of stroke who more likely to benefit from AC therapy [35] are not  
5 receiving appropriate treatment, perhaps because of a perceived increased risk of bleeding. In fact,  
6 several bleeding risk factors such as falls, peptic ulcer disease, anaemia, and previous risk of  
7 intracranial or gastrointestinal bleeds were found to also be associated with an increasing likelihood  
8 of remaining untreated. A survey of UK general practices from 2000 to 2009 showed that this  
9 underuse of AC therapy in the elderly is not adequately explained by either an increase in  
10 comorbidities or bleeding risk.[37]

11  
12 In addition to age, female patients were found less likely to be treated with AC. This sex difference in  
13 prescribing has been previously observed in a UK study in AF.[7] Given that women with AF appear  
14 to lose their protection against sudden death including stroke,[38] and may even have a higher  
15 mortality than men,[39] these lower AC rates are a cause for concern.

16  
17 AP alone was found to be prescribed more frequently in patients with coronary artery disease. This  
18 may highlight the lack of a definitive evidence base and clear guidance on the AT management of  
19 these patients, particularly in the initial period following an acute coronary syndrome.

### 20 21 22 23 24 25 26 27 28 29 30 31 32 33 34 35 36 37 38 **STRENGTHS AND LIMITATIONS**

39  
40 This is a large study of a representative population of NVAf patients managed in the UK. It includes  
41 patients with all forms of AF, including paroxysmal and chronic. The study may have not detected  
42 some individuals receiving AC prescriptions in secondary care. The National Patient Safety Agency  
43 has emphasised the importance of good communication between different bodies sharing  
44 responsibility for prescribing potentially interacting medication, and this has increased the use of  
45 codes in primary care to maintain awareness of AC therapy prescribed elsewhere.[8, 40] A sensitivity  
46 analysis using a time period of 180 days prior to index date was used to evaluate the proportion of  
47 patients that could have been misclassified as untreated. This analysis provided the same results,  
48 with only 2% difference in the proportion of untreated patients observed.

1  
2  
3 This study is based on a general practice database, and is limited by the accuracy of GP records.  
4  
5 Validation of the CPRD has shown high positive predictive value of some diagnoses and, where  
6  
7 evaluated, comparisons of incidence with other UK data sources are also broadly similar.[41]  
8  
9 However, the completeness of the record is more difficult to ascertain. We acknowledge that the  
10  
11 results reported in this study may under-represent comorbidities and, hence, overall stroke risk.  
12  
13

14  
15 It is important to note that due to the falling number of GP practices involved in the CRPD, the  
16  
17 number of eligible patients with NVAF also fell during the study period. However, a sensitivity  
18  
19 analysis was conducted on the NVAF population who were registered to a GP practice included in  
20  
21 the CPRD throughout the study period, and the results were unchanged. Therefore, the observed  
22  
23 change in AT management cannot be attributed to the reduction in available GP data.  
24  
25

26  
27 It is important to reflect on the differences in the nature of data collection and analysis between  
28  
29 registry and real world healthcare records, whereby participation in a registry may influence  
30  
31 treatment selection but allow more complete and accurate data collection, whereas real world  
32  
33 datasets allow analysis of much larger cohorts that are more likely to reflect wider contemporary  
34  
35 practice, albeit with less complete and well-validated data.  
36  
37

## 38 **CONCLUSION**

39  
40 Major improvements in the AC management of patients with NVAF for stroke prevention in the UK  
41  
42 were observed between April 2012 and January 2016. Despite this, 20% of the at-risk population  
43  
44 were still treated with AP alone and more than 15% of patients were on no AT agents in January  
45  
46 2016. However, if the trend of rapid reduction of AP use observed during the study period continues,  
47  
48 then the use of AP alone for stroke prevention could essentially disappear in the next few years in  
49  
50 the UK. The consistency observed over time in the proportion of patients not treated with any AT  
51  
52 therapy represents the area of greatest concern. The clinical inertia seen in this group may be due to  
53  
54 an underestimate of the risk of stroke in these patients, who were found to be younger with less  
55  
56 comorbidities and the overestimation of bleeding risk in the elderly (>85 years). There remains a  
57  
58  
59  
60

1  
2  
3 huge potential for reducing the stroke risk of the AF population by improving the thromboembolic  
4  
5 risk assessment in NVAf in primary care and the identification of patients requiring anticoagulation.  
6  
7

#### 8 **CONTRIBUTORSHIP STATEMENT**

9  
10 LL, CL, DE and JH conceived and designed the study. LM, MP and SR undertook the analysis. LL, ML,  
11  
12 ER, MP, LM, SR, CL, DE, and JH contributed to the interpretation of the data. LM and LL wrote the  
13  
14 first draft and ML, ER, MP, SR, CL, DE, and JH critically reviewed the draft and approved the final  
15  
16 manuscript as submitted.  
17  
18  
19

#### 20 **ACKNOWLEDGMENTS**

21  
22 The authors would like to gratefully acknowledge the contribution of Sharon McLachlan, Robert  
23  
24 Donaldson and Jack Ishak who all provided expert opinion during the data analysis.  
25  
26  
27

#### 28 **COMPETING INTERESTS**

29  
30 MP, LM, and SR were employees of Evidera who were paid consultants to Bristol-Myers Squibb  
31  
32 (BMS) in connection with conducting this study and with the development of this manuscript. JH  
33  
34 received consultancy fees from BMS for the conduct of this study. DE, ER, and LL were BMS  
35  
36 employees at the time of the research. ML is a fulltime employee of Pfizer.  
37  
38  
39

#### 40 **FUNDING**

41  
42 Bristol Myers Squibb funded this study and all costs associated with the development and  
43  
44 publishing of the present manuscript.  
45  
46

#### 47 **DATA SHARING**

48  
49 No additional data are available.  
50  
51  
52  
53  
54  
55  
56  
57  
58  
59  
60



## REFERENCES

1. Go AS, Hylek EM, Phillips KA, Chang Y, Henault LE, Selby JV, Singer DE. Prevalence of diagnosed atrial fibrillation in adults: national implications for rhythm management and stroke prevention: the AnTicoagulation and Risk Factors in Atrial Fibrillation (ATRIA) Study. *JAMA* 2001; 285: 2370-2375.
2. Public Health England. Atrial fibrillation prevalence estimates in England: application of recent population estimates of AF in Sweden 2015 [December 2015]. Available from: <http://www.yhpho.org.uk//resource/view.aspx?RID=207902>
3. Kirchhof P, Auricchio A, Bax J, Crijns H, Camm J, Diener HC, Goette A, Hindricks G, Hohnloser S, Kappenberger L, Kuck KH, Lip GY, Olsson B, Meinertz T, Priori S, Ravens U, Steinbeck G, Svernhage E, Tijssen J, Vincent A, et al. Outcome parameters for trials in atrial fibrillation: executive summary. *Eur Heart J* 2007; 28: 2803-2817.
4. Royal College of Physicians. Sentinel Stroke National Audit Programme (SSNAP). Clinical audit April - June 2015 report prepared by Royal College of Physicians, Clinical Effectiveness and Evaluation Unit on behalf of the Intercollegiate Stroke Working Party. 2015.
5. Lin HJ, Wolf PA, Kelly-Hayes M, Beiser AS, Kase CS, Benjamin EJ, D'Agostino RB. Stroke severity in atrial fibrillation. The Framingham Study. *Stroke* 1996; 27: 1760-1764.
6. Majeed A, Moser K, Carroll K. Trends in the prevalence and management of atrial fibrillation in general practice in England and Wales, 1994-1998: analysis of data from the general practice research database. *Heart* 2001; 86: 284-288.
7. DeWilde S, Carey IM, Emmas C, Richards N, Cook DG. Trends in the prevalence of diagnosed atrial fibrillation, its treatment with anticoagulation and predictors of such treatment in UK primary care. *Heart* 2006; 92: 1064-1070.
8. Holt TA, Hunter TD, Gunnarsson C, Khan N, Cload P, Lip GY. Risk of stroke and oral anticoagulant use in atrial fibrillation: a cross-sectional survey. *Br J Gen Pract* 2012; 62: e710-717.
9. Ogilvie IM, Newton N, Welner SA, Cowell W, Lip GY. Underuse of oral anticoagulants in atrial fibrillation: a systematic review. *Am J Med* 2010; 123: 638-645 e634.
10. Nieuwlaat R, Capucci A, Lip GY, Olsson SB, Prins MH, Nieman FH, Lopez-Sendon J, Vardas PE, Aliot E, Santini M, Crijns HJ, Euro Heart Survey I. Antithrombotic treatment in real-life atrial fibrillation patients: a report from the Euro Heart Survey on Atrial Fibrillation. *Eur Heart J* 2006; 27: 3018-3026.
11. Sandhu RK, Bakal JA, Ezekowitz JA, McAlister FA. Risk stratification schemes, anticoagulation use and outcomes: the risk--treatment paradox in patients with newly diagnosed non-valvular atrial fibrillation. *Heart* 2011; 97: 2046-2050.
12. Cowan C, Healicon R, Robson I, Long WR, Barrett J, Fay M, Tyndall K, Gale CP. The use of anticoagulants in the management of atrial fibrillation among general practices in England. *Heart* 2013; 99: 1166-1172.
13. Camm AJ, Lip GY, De Caterina R, Savelieva I, Atar D, Hohnloser SH, Hindricks G, Kirchhof P, ESC Committee for Practice Guidelines-CPG. 2012 focused update of the ESC Guidelines for the management of atrial fibrillation: an update of the 2010 ESC Guidelines for the management of atrial fibrillation--developed with the special contribution of the European Heart Rhythm Association. *Europace* 2012; 14: 1385-1413.

14. Lip GY, Nieuwlaat R, Pisters R, Lane DA, Crijns HJ. Refining clinical risk stratification for predicting stroke and thromboembolism in atrial fibrillation using a novel risk factor-based approach: the euro heart survey on atrial fibrillation. *Chest* 2010; 137: 263-272.
15. Lip GY. Stroke in atrial fibrillation: epidemiology and thromboprophylaxis. *J Thromb Haemost* 2011; 9 Suppl 1: 344-351.
16. Potpara TS, Polovina MM, Licina MM, Marinkovic JM, Prostran MS, Lip GY. Reliable identification of "truly low" thromboembolic risk in patients initially diagnosed with "lone" atrial fibrillation: the Belgrade atrial fibrillation study. *Circ Arrhythm Electrophysiol* 2012; 5: 319-326.
17. Olesen JB, Torp-Pedersen C, Hansen ML, Lip GY. The value of the CHA2DS2-VASc score for refining stroke risk stratification in patients with atrial fibrillation with a CHADS2 score 0-1: a nationwide cohort study. *Thromb Haemost* 2012; 107: 1172-1179.
18. Van Staa TP, Setakis E, Di Tanna GL, Lane DA, Lip GY. A comparison of risk stratification schemes for stroke in 79,884 atrial fibrillation patients in general practice. *J Thromb Haemost* 2011; 9: 39-48.
19. Abu-Assi E, Otero-Ravina F, Allut Vidal G, Coutado Mendez A, Vaamonde Mosquera L, Sanchez Loureiro M, Caneda Villar MC, Fernandez Villaverde JM, Maestro Saavedra FJ, Gonzalez-Juanatey JR, Grupo Barbanza researchers. Comparison of the reliability and validity of four contemporary risk stratification schemes to predict thromboembolism in non-anticoagulated patients with atrial fibrillation. *Int J Cardiol* 2013; 166: 205-209.
20. Royal College of Physicians. Sentinel Stroke National Audit Programme (SSNAP). Clinical audit first pilot public report; August 2013.
21. National Clinical Guideline Centre. Atrial fibrillation: the management of atrial fibrillation. Clinical guideline: methods, evidence and recommendations [NICE CG180]. 2014.
22. NICE Implementation Collaborative. Consensus supporting local implementation of NICE guidance on use of the novel (non-Vitamin K antagonist) oral anticoagulants in non-valvular atrial fibrillation. 2014.
23. Herrett E, Gallagher AM, Bhaskaran K, Forbes H, Mathur R, van Staa T, Smeeth L. Data Resource Profile: Clinical Practice Research Datalink (CPRD). *Int J Epidemiol* 2015; 44: 827-836.
24. Penfold RB, Zhang F. Use of interrupted time series analysis in evaluating health care quality improvements. *Acad Pediatr* 2013; 13: S38-44.
25. Bassand JP, Accetta G, Camm AJ, Cools F, Fitzmaurice DA, Fox KA, Goldhaber SZ, Goto S, Haas S, Hacke W, Kayani G, Mantovani LG, Misselwitz F, Ten Cate H, Turpie AG, Verheugt FW, Kakkur AK, Garfield-Af Investigators. Two-year outcomes of patients with newly diagnosed atrial fibrillation: results from GARFIELD-AF. *Eur Heart J* 2016.
26. Huisman MV, Rothman KJ, Paquette M, Teutsch C, Diener HC, Dubner SJ, Halperin JL, Ma C, Zint K, Elsaesser A, Bartels DB, Lip GY, Gloria-Af Investigators. Antithrombotic Treatment Patterns in Patients with Newly Diagnosed Nonvalvular Atrial Fibrillation: The GLORIA-AF Registry, Phase II. *Am J Med* 2015; 128: 1306-1313 e1301.
27. Camm AJ, Accetta G, Ambrosio G, Atar D, Bassand JP, Berge E, Cools F, Fitzmaurice DA, Goldhaber SZ, Goto S, Haas S, Kayani G, Koretsune Y, Mantovani LG, Misselwitz F, Oh S, Turpie AG, Verheugt FW, Kakkur AK, Garfield-Af Investigators. Evolving antithrombotic treatment patterns for patients with newly diagnosed atrial fibrillation. *Heart* 2016.

- 1
  - 2
  - 3
  - 4
  - 5
  - 6
  - 7
  - 8
  - 9
  - 10
  - 11
  - 12
  - 13
  - 14
  - 15
  - 16
  - 17
  - 18
  - 19
  - 20
  - 21
  - 22
  - 23
  - 24
  - 25
  - 26
  - 27
  - 28
  - 29
  - 30
  - 31
  - 32
  - 33
  - 34
  - 35
  - 36
  - 37
  - 38
  - 39
  - 40
  - 41
  - 42
  - 43
  - 44
  - 45
  - 46
  - 47
  - 48
  - 49
  - 50
  - 51
  - 52
  - 53
  - 54
  - 55
  - 56
  - 57
  - 58
  - 59
  - 60
28. Friberg L, Hammar N, Ringh M, Pettersson H, Rosenqvist M. Stroke prophylaxis in atrial fibrillation: who gets it and who does not? Report from the Stockholm Cohort-study on Atrial Fibrillation (SCAF-study). *Eur Heart J* 2006; 27: 1954-1964.
29. Waldo AL, Becker RC, Tapson VF, Colgan KJ, Committee NS. Hospitalized patients with atrial fibrillation and a high risk of stroke are not being provided with adequate anticoagulation. *J Am Coll Cardiol* 2005; 46: 1729-1736.
30. Gallagher AM, Rietbrock S, Plumb J, van Staa TP. Initiation and persistence of warfarin or aspirin in patients with chronic atrial fibrillation in general practice: do the appropriate patients receive stroke prophylaxis? *J Thromb Haemost* 2008; 6: 1500-1506.
31. Falstaf Study Group, Leizorovicz A, Cohen A, Guenoun M, Mismetti P, Weisslinger N. Influence of age on the prescription of vitamin K antagonists in outpatients with permanent atrial fibrillation in France. *Pharmacoepidemiol Drug Saf* 2007; 16: 32-38.
32. Simpson CR, Wilson C, Hannaford PC, Williams D. Evidence for age and sex differences in the secondary prevention of stroke in Scottish primary care. *Stroke* 2005; 36: 1771-1775.
33. Mant J, Hobbs FD, Fletcher K, Roalfe A, Fitzmaurice D, Lip GY, Murray E, Bafta investigators, Midland Research Practices Network. Warfarin versus aspirin for stroke prevention in an elderly community population with atrial fibrillation (the Birmingham Atrial Fibrillation Treatment of the Aged Study, BAFTA): a randomised controlled trial. *Lancet* 2007; 370: 493-503.
34. Rash A, Downes T, Portner R, Yeo WW, Morgan N, Channer KS. A randomised controlled trial of warfarin versus aspirin for stroke prevention in octogenarians with atrial fibrillation (WASPO). *Age Ageing* 2007; 36: 151-156.
35. van Walraven C, Hart RG, Connolly S, Austin PC, Mant J, Hobbs FD, Koudstaal PJ, Petersen P, Perez-Gomez F, Knottnerus JA, Boode B, Ezekowitz MD, Singer DE. Effect of age on stroke prevention therapy in patients with atrial fibrillation: the atrial fibrillation investigators. *Stroke* 2009; 40: 1410-1416.
36. Garwood CL, Corbett TL. Use of anticoagulation in elderly patients with atrial fibrillation who are at risk for falls. *Ann Pharmacother* 2008; 42: 523-532.
37. Scowcroft AC, Lee S, Mant J. Thromboprophylaxis of elderly patients with AF in the UK: an analysis using the General Practice Research Database (GPRD) 2000-2009. *Heart* 2013; 99: 127-132.
38. Benjamin EJ, Wolf PA, D'Agostino RB, Silbershatz H, Kannel WB, Levy D. Impact of atrial fibrillation on the risk of death: the Framingham Heart Study. *Circulation* 1998; 98: 946-952.
39. Stewart S, Hart CL, Hole DJ, McMurray JJ. A population-based study of the long-term risks associated with atrial fibrillation: 20-year follow-up of the Renfrew/Paisley study. *Am J Med* 2002; 113: 359-364.
40. Baglin TP, Cousins D, Keeling DM, Perry DJ, Watson HG. Safety indicators for inpatient and outpatient oral anticoagulant care: [corrected] Recommendations from the British Committee for Standards in Haematology and National Patient Safety Agency. *Br J Haematol* 2007; 136: 26-29.
41. Herrett E, Thomas SL, Schoonen WM, Smeeth L, Hall AJ. Validation and validity of diagnoses in the General Practice Research Database: a systematic review. *Br J Clin Pharmacol* 2010; 69: 4-14.

1  
2  
3 **FIGURE LEGENDS**  
4

5  
6 **Figure 1. Flowchart describing the sample used in each year**  
7

8  
9 **Figure 2. Evolution of the proportion of patients treated with each anticoagulant, with antiplatelet**  
10 **therapy alone or no antithrombotic therapy among patients with NVAF with CHA2DS2-VASc  $\geq 2$**   
11 **separately in newly diagnosed patients (A) and patients diagnosed since 12 months or more (B)**  
12  
13

14  
15  
16 A) Newly diagnosed patients with NVAF  
17

18  
19 B) Patients with NVAF diagnosis since 12 months or more  
20

21  
22 **Figure 3. Time series analysis describing the trends in the evolution of the proportion of patients**  
23 **with NVAF treated with anticoagulants, aspirin, or other antiplatelet therapy alone or without any**  
24 **antithrombotic treatment from April 2012 to April 2015 in the UK, by time since NVAF diagnosis**  
25  
26  
27

28  
29 A. Anticoagulation treatment  
30

31  
32

|                                              | Pre-ESC <sup>1</sup> |      |         | Post-ESC <sup>2</sup> |      |         | Post-NICE <sup>2</sup> |      |         |
|----------------------------------------------|----------------------|------|---------|-----------------------|------|---------|------------------------|------|---------|
|                                              | $\beta$              | SE   | p-value | $\beta$               | SE   | p-value | $\beta$                | SE   | p-value |
| <b>Diagnosed &lt; 12 months</b>              |                      |      |         |                       |      |         |                        |      |         |
| <b>Level</b>                                 | 43.09                | 0.26 | <.0001  | 0.28                  | 0.35 | 0.418   | 0.10                   | 0.49 | 0.846   |
| <b>Trend</b>                                 | 0.34                 | 0.02 | <.0001  | 0.26                  | 0.03 | <.0001  | 0.12                   | 0.09 | 0.171   |
| <b>Diagnosed <math>\geq 12</math> months</b> |                      |      |         |                       |      |         |                        |      |         |
| <b>Level</b>                                 | 49.01                | 0.07 | <.0001  | 0.00                  | 0.10 | 0.981   | -0.16                  | 0.14 | 0.251   |
| <b>Trend</b>                                 | 0.13                 | 0.01 | <.0001  | 0.18                  | 0.01 | <.0001  | 0.15                   | 0.02 | <.0001  |

33  
34  
35  
36  
37  
38  
39  
40  
41  
42  
43  
44  
45  
46  
47

48 <sup>1</sup>For Pre-ESC data are base level, base trend. <sup>2</sup>Post-ESC and Post-NICE data are change in level, change in trend  
49  
50  
51  
52  
53  
54  
55  
56  
57  
58  
59  
60

## B. Aspirin (ASA) or other AP only

|                                             | Pre-ESC <sup>1</sup> |      |         | Post-ESC <sup>2</sup> |      |         | Post-NICE <sup>2</sup> |      |         |
|---------------------------------------------|----------------------|------|---------|-----------------------|------|---------|------------------------|------|---------|
|                                             | $\beta$              | SE   | p-value | $\beta$               | SE   | p-value | $\beta$                | SE   | p-value |
| <b>Diagnosed &lt;12months</b>               |                      |      |         |                       |      |         |                        |      |         |
| <b>Level</b>                                | 41.94                | 0.24 | <.0001  | -0.20                 | 0.31 | 0.518   | -0.63                  | 0.44 | 0.159   |
| <b>Trend</b>                                | -0.36                | 0.02 | <.0001  | -0.26                 | 0.03 | <.0001  | -0.10                  | 0.08 | 0.226   |
| <b>Diagnosed <math>\geq</math>12 months</b> |                      |      |         |                       |      |         |                        |      |         |
| <b>Level</b>                                | 35.05                | 0.06 | <.0001  | 0.03                  | 0.08 | 0.737   | -0.33                  | 0.12 | 0.008   |
| <b>Trend</b>                                | -0.12                | 0.01 | <.0001  | -0.15                 | 0.01 | <.0001  | -0.21                  | 0.02 | <.0001  |

<sup>1</sup>For Pre-ESC data are base level, base trend. <sup>2</sup>Post-ESC and Post-NICE data are change in level, change in trend

## C. Without any antithrombotic treatment

|                                             | Pre-ESC <sup>1</sup> |      |         | Post-ESC <sup>2</sup> |      |         | Post-NICE <sup>2</sup> |      |         |
|---------------------------------------------|----------------------|------|---------|-----------------------|------|---------|------------------------|------|---------|
|                                             | $\beta$              | SE   | p-value | $\beta$               | SE   | p-value | $\beta$                | SE   | p-value |
| <b>Diagnosed &lt;12months</b>               |                      |      |         |                       |      |         |                        |      |         |
| <b>Level</b>                                | 14.97                | 0.15 | <.0001  | -0.08                 | 0.19 | 0.6835  | 0.54                   | 0.27 | 0.057   |
| <b>Trend</b>                                | 0.02                 | 0.01 | 0.211   | 0.00                  | 0.02 | 0.9262  | -0.03                  | 0.05 | 0.612   |
| <b>Diagnosed <math>\geq</math>12 months</b> |                      |      |         |                       |      |         |                        |      |         |
| <b>Level</b>                                | 15.94                | 0.07 | <.0001  | -0.03                 | 0.10 | 0.789   | 0.49                   | 0.14 | 0.001   |
| <b>Trend</b>                                | -0.01                | 0.01 | 0.174   | -0.03                 | 0.01 | 0.000   | 0.06                   | 0.02 | 0.015   |

<sup>1</sup>For Pre-ESC data are base level, base trend. <sup>2</sup>Post-ESC and Post-NICE data are change in level, change in trend

**Table 1. Demographic and clinical characteristics of patients with NVAf on each index date (data given as n, % unless stated otherwise)**

|                                           | April 2012       |      | April 2013       |      | April 2014       |      | April 2015       |      | Jan 2016         |      |
|-------------------------------------------|------------------|------|------------------|------|------------------|------|------------------|------|------------------|------|
|                                           | (n=67327)        |      | (n=66364)        |      | (n=62840)        |      | (n=53150)        |      | (n=45105)        |      |
|                                           | n                | %    | n                | %    | n                | %    | n                | %    | n                | %    |
| <b>Age (years) mean (SD)</b>              | 78 (10)          |      | 78 (10)          |      | 78 (10)          |      | 78 (9.9)         |      | 78 (9.9)         |      |
| <b>Gender: Male</b>                       | 35277            | 52.4 | 35096            | 52.9 | 33477            | 53.3 | 28756            | 54.1 | 24495            | 54.3 |
| <b>Country</b>                            |                  |      |                  |      |                  |      |                  |      |                  |      |
| England                                   | 51055            | 75.8 | 49721            | 74.9 | 45422            | 72.3 | 36910            | 69.4 | 28226            | 62.6 |
| Wales                                     | 7193             | 10.7 | 7168             | 10.8 | 7658             | 12.2 | 6791             | 12.8 | 7088             | 15.7 |
| Scotland                                  | 6826             | 10.1 | 7132             | 10.7 | 7331             | 11.7 | 6850             | 12.9 | 7060             | 15.7 |
| Northern Ireland                          | 2253             | 3.3  | 2343             | 3.5  | 2429             | 3.9  | 2599             | 4.9  | 2731             | 6.1  |
| <b>Smoking status</b>                     |                  |      |                  |      |                  |      |                  |      |                  |      |
| Current smoker                            | 4685             | 7.0  | 4500             | 6.8  | 4087             | 6.5  | 3305             | 6.2  | 2877             | 6.4  |
| Past smoker                               | 34297            | 50.9 | 34019            | 51.3 | 32258            | 51.3 | 27389            | 51.5 | 23119            | 51.3 |
| <b>Body mass index (kg/m<sup>2</sup>)</b> |                  |      |                  |      |                  |      |                  |      |                  |      |
| Missing data                              | 5283             | 7.8  | 4588             | 6.9  | 3990             | 6.3  | 3209             | 6.0  | 2667             | 5.9  |
| Median (Q1-Q3)                            | 27.2 (24.1-31.1) |      | 27.2 (24.1-31.2) |      | 27.3 (24.2-31.2) |      | 27.4 (24.3-31.4) |      | 27.6 (24.3-31.5) |      |
| <b>GP consultation in the last</b>        |                  |      |                  |      |                  |      |                  |      |                  |      |
| year Median (Q1-Q3)                       | 13 (8-22)        |      | 13 (8-22)        |      | 14 (8-23)        |      | 14 (8-23)        |      | 14 (8-22)        |      |
| <b>Newly diagnosed NVAf</b>               | 8197             | 12.2 | 8104             | 12.2 | 7421             | 11.8 | 6255             | 11.8 | 5564             | 12.3 |
| <b>Stroke risk factors</b>                |                  |      |                  |      |                  |      |                  |      |                  |      |
| Previous stroke/TIA                       | 13136            | 19.5 | 12966            | 19.5 | 12312            | 19.6 | 10393            | 19.6 | 8986             | 19.9 |
| Other arterial thromboembolism            | 281              | 0.4  | 267              | 0.4  | 243              | 0.4  | 207              | 0.4  | 182              | 0.4  |
| Congestive heart failure                  | 11970            | 17.8 | 11536            | 17.4 | 10780            | 17.2 | 9296             | 17.5 | 8272             | 18.3 |
| Coronary artery disease                   | 21158            | 31.4 | 20213            | 30.5 | 18691            | 29.7 | 15383            | 28.9 | 12892            | 28.6 |
| Peripheral arterial disease               | 4136             | 6.1  | 3978             | 6    | 3671             | 5.8  | 2958             | 5.6  | 2491             | 5.5  |
| Hypertension                              | 65349            | 97.1 | 64557            | 97.3 | 61255            | 97.5 | 51872            | 97.6 | 44039            | 97.6 |
| Diabetes mellitus                         | 13949            | 20.7 | 13974            | 21.1 | 13564            | 21.6 | 11779            | 22.2 | 10222            | 22.7 |

|                                         | April 2012 |        | April 2013 |        | April 2014 |        | April 2015 |        | Jan 2016  |        |
|-----------------------------------------|------------|--------|------------|--------|------------|--------|------------|--------|-----------|--------|
|                                         | (n=67327)  |        | (n=66364)  |        | (n=62840)  |        | (n=53150)  |        | (n=45105) |        |
|                                         | n          | %      | n          | %      | n          | %      | n          | %      | n         | %      |
| <b>CHA2DS2-VASc score</b>               |            |        |            |        |            |        |            |        |           |        |
| Median (Q1-Q3)                          | 4          | (3-5)  | 4          | (3-5)  | 4          | (3-5)  | 4          | (3-5)  | 4         | (3-5)  |
| <b>Modified HAS-BLED score*</b>         |            |        |            |        |            |        |            |        |           |        |
| Median (Q1-Q3)                          | 4          | (3-4)  | 4          | (3-4)  | 4          | (3-4)  | 4          | (3-4)  | 4         | (3-4)  |
| <b>Previous bleedings</b>               | 22136      | 32.9   | 22260      | 33.5   | 21770      | 34.6   | 18669      | 35.1   | 15889     | 35.2   |
| Intracranial                            | 1166       | 1.7    | 1223       | 1.8    | 1238       | 2.0    | 1039       | 2.0    | 897       | 2.0    |
| Gastrointestinal                        | 7755       | 11.5   | 7700       | 11.6   | 7575       | 12.1   | 6536       | 12.3   | 5677      | 12.6   |
| <b>Renal disease</b>                    | 23367      | 34.7   | 23003      | 34.7   | 21391      | 34     | 17796      | 33.5   | 15061     | 33.4   |
| <b>Liver disease</b>                    | 454        | 0.7    | 478        | 0.7    | 475        | 0.8    | 425        | 0.8    | 393       | 0.9    |
| <b>Number of concomitant treatments</b> |            |        |            |        |            |        |            |        |           |        |
| Median (Q1-Q3)                          | 8          | (5-11) | 8          | (5-11) | 8          | (5-11) | 8          | (5-11) | 7         | (5-11) |

Abbreviations: GP, general practitioner; NVAf, non-valvular atrial fibrillation; SD, standard deviation; TIA, transient ischaemic attack

\* Excluding INR component as not consistently reported in CPRD, score range: 0–8.

**Table 2. Evolution of the proportion of patients treated with anticoagulants, with antiplatelet therapy alone or no antithrombotic therapy among patients with NVAf with CHA2DS2-VASc  $\geq$  2**

|                            | April 2012              | April 2013              | April 2014              | April 2015              | January 2016            |
|----------------------------|-------------------------|-------------------------|-------------------------|-------------------------|-------------------------|
|                            | % (95% CI)              |
| Anticoagulation            | <b>50.2</b> (49.8-55.5) | <b>53.2</b> (52.8-53.5) | <b>57.5</b> (57.1-57.9) | <b>62.9</b> (62.5-63.3) | <b>66.9</b> (66.5-67.3) |
| Antiplatelet therapy alone | <b>34.2</b> (33.9-34.5) | <b>31.2</b> (30.8-31.5) | <b>27.7</b> (27.3-28.0) | <b>21.8</b> (21.5-22.2) | <b>17.4</b> (17.1-17.8) |
| No antithrombotic therapy  | <b>15.6</b> (15.4-15.9) | <b>15.7</b> (15.4-15.9) | <b>14.8</b> (14.6-15.1) | <b>15.3</b> (15.0-15.6) | <b>15.7</b> (15.4-16.0) |

Abbreviations: CI, confidence interval

For peer review only - Highly Confidential



**Table 3. Factors associated with the prescription of aspirin or other antiplatelet for TE prevention in NVAF in April 2015 (vs. anticoagulation): results of the GEE model**

|                                          | Antiplatelet therapy |      | Treated with  |      | OR (95% CI)       | P-value |
|------------------------------------------|----------------------|------|---------------|------|-------------------|---------|
|                                          | alone                |      | anticoagulant |      |                   |         |
|                                          | N=11,609             |      | N= 33,413     |      |                   |         |
|                                          | n                    | %    | N             | %    |                   |         |
| <b>Patient age (years)</b>               |                      |      |               |      |                   | < .0001 |
| < 65                                     | 890                  | 7.7  | 2016          | 6.0  | 1.22 (1.10-1.35)  |         |
| 65 to 74                                 | 2769                 | 23.9 | 8780          | 26.3 | Reference         |         |
| 75 to 84                                 | 3842                 | 33.1 | 14363         | 43.0 | 0.94 (0.87-1.02)  |         |
| ≥ 85                                     | 4108                 | 35.4 | 8254          | 24.7 | 1.72 (1.58-1.87)  |         |
| <b>Country</b>                           |                      |      |               |      |                   | 0.001   |
| England                                  | 8065                 | 69.5 | 22909         | 68.6 | Reference.        |         |
| Wales                                    | 1383                 | 11.9 | 4524          | 13.5 | 0.80 (0.70-0.91)  |         |
| Scotland                                 | 1590                 | 13.7 | 4231          | 12.7 | 1.06 (0.96-1.19)  |         |
| N. Ireland                               | 571                  | 4.9  | 1749          | 5.2  | 0.83 (0.72-0.97)  |         |
| <b>Gender: male (reference = female)</b> | 5364                 | 46.2 | 14580         | 43.6 | 0.87 (0.81-0.93)  | <.0001  |
| <b>Time since NVAF diagnosis</b>         |                      |      |               |      |                   | <.0001  |
| < 6 months                               | 497                  | 4.3  | 2121          | 6.3  | Reference         |         |
| 6 to 12 months                           | 442                  | 3.8  | 2175          | 6.5  | 0.96 (0.83-1.11)  |         |
| 12 to 24 months                          | 979                  | 8.4  | 3886          | 11.6 | 1.24 (1.10-1.41)  |         |
| 2 to 5 years since                       | 3095                 | 26.7 | 8496          | 25.4 | 1.89 (1.68-2.12)  |         |
| ≥ 5 years                                | 6596                 | 56.8 | 16735         | 50.1 | 2.17 (1.93-2.44)  |         |
| <b>Previous oral AC treatment</b>        |                      |      |               |      |                   | <.0001  |
| No previous treatment                    | 8093                 | 69.7 | 21189         | 63.4 | Reference         |         |
| NOAC only                                | 87                   | 0.7  | 411           | 1.2  | 0.61 (0.46-0.81)  |         |
| VKA and NOAC                             | 76                   | 0.7  | 490           | 1.5  | 0.37 (0.29-0.47)  |         |
| VKA only                                 | 3353                 | 28.9 | 11323         | 33.9 | 0.65 (0.59-0.72)  |         |
| <b>Previous stroke/TIA/arterial TE</b>   | 2291                 | 19.7 | 7341          | 22.0 | 0.83 (0.75-0.92)  | 0.0008  |
| <b>Congestive heart failure</b>          | 1722                 | 14.8 | 6685          | 20.0 | 0.61 (0.56-0.66)  | <.0001  |
| <b>Previous coronary artery disease</b>  | 4535                 | 39.1 | 9636          | 28.8 | 1.60 (1.50--1.71) | <.0001  |

|                                    | Antiplatelet therapy |      | Treated with  |      | OR (95% CI)      | P-value |
|------------------------------------|----------------------|------|---------------|------|------------------|---------|
|                                    | alone                |      | anticoagulant |      |                  |         |
|                                    | N=11,609             |      | N= 33,413     |      |                  |         |
|                                    | n                    | %    | N             | %    |                  |         |
| <b>Peripheral arterial disease</b> | 833                  | 7.2  | 1887          | 5.6  | 1.20 (1.10-1.31) | 0.0001  |
| <b>Hypertension</b>                | 11308                | 97.4 | 32869         | 98.4 | 0.59 (0.51-0.69) | <.0001  |
| <b>CHA2DS2-VASc score</b>          |                      |      |               |      |                  | <.0001  |
| 2                                  | 1425                 | 12.3 | 3444          | 10.3 | Reference        |         |
| 3                                  | 2408                 | 20.7 | 7482          | 22.4 | 0.69 (0.63-0.76) |         |
| 4                                  | 3206                 | 27.6 | 9656          | 28.9 | 0.56 (0.50-0.64) |         |
| 5                                  | 2306                 | 19.9 | 6544          | 19.6 | 0.54 (0.46-0.64) |         |
| ≥6                                 | 2264                 | 19.5 | 6287          | 18.9 | 0.52 (0.42-0.65) |         |
| <b>Previous bleed</b>              |                      |      |               |      |                  | <.0001  |
| No bleed                           | 7522                 | 64.8 | 21577         | 64.6 | Reference        |         |
| Intracranial bleed                 | 346                  | 3.0  | 404           | 1.2  | 3.02 (2.56-3.56) |         |
| Gastrointestinal bleed             | 1430                 | 12.3 | 4001          | 11.8 | 0.96 (0.90-1.02) |         |
| Other bleed                        | 2311                 | 19.9 | 7473          | 22.4 | 0.82 (0.77-0.87) |         |
| <b>History of fall</b>             | 3474                 | 29.9 | 8211          | 24.6 | 1.14 (1.08-1.20) | <.0001  |
| <b>Renal disease</b>               | 4106                 | 35.4 | 11542         | 34.5 | 0.94 (0.90-0.99) | 0.0131  |
| <b>Liver disease</b>               | 102                  | 0.9  | 214           | 0.6  | 1.32 (1.03-1.70) | 0.0414  |
| <b>Number of comedications</b>     |                      |      |               |      |                  | <.0001  |
| < 5                                | 1448                 | 12.5 | 6879          | 20.6 | Reference        |         |
| 5 to 9                             | 5040                 | 43.4 | 14825         | 44.4 | 1.71 (1.60-1.82) |         |
| 10 to 14                           | 3169                 | 27.3 | 7782          | 23.3 | 2.08 (1.93-2.26) |         |
| 15 or more                         | 1952                 | 16.8 | 3927          | 11.8 | 2.66 (2.43-2.91) |         |

Abbreviations: CI, confidence interval; GEE, generalised estimating equations; VKA, vitamin K antagonist; OAC, oral anticoagulant; NVAF, non-valvular atrial fibrillation; TIA, transient ischaemic attack; TE, thromboembolism; OR, odds ratio; NOAC, novel oral anticoagulant.

Management of NVAF in Europe and the UK

**Table 4. Factor associated with the absence of TE prevention (no antithrombotic therapy vs. anticoagulation) in NVAF in April 2015: results of the GEE model**

| Parameter                                | No antithrombotic therapy |      | Treated with anticoagulant |      | OR (95% CI)      | P-value |
|------------------------------------------|---------------------------|------|----------------------------|------|------------------|---------|
|                                          | N=8,128                   |      | N= 33,413                  |      |                  |         |
|                                          | n                         | %    | n                          | %    |                  |         |
| <b>Patient age (years)</b>               |                           |      |                            |      |                  | <.0001  |
| < 65                                     | 1299                      | 16   | 2016                       | 6.0  | 1.64 (1.47-1.83) |         |
| 65 to 74                                 | 2214                      | 27.2 | 8780                       | 26.3 | Reference        |         |
| 75 to 84                                 | 2367                      | 29.1 | 14363                      | 43.0 | 1.09 (0.99-1.20) |         |
| ≥ 85                                     | 2248                      | 27.7 | 8254                       | 24.7 | 1.86 (1.68-2.07) |         |
| <b>Gender: male (reference = female)</b> | 4450                      | 54.7 | 14580                      | 43.6 | 0.51 (0.46-0.56) | <.0001  |
| <b>Country</b>                           |                           |      |                            |      |                  |         |
| England                                  | 5936                      | 73.0 | 22909                      | 68.6 | Reference        | <.0001  |
| Wales                                    | 884                       | 10.9 | 4524                       | 13.5 | 0.80 (0.69-0.93) |         |
| Scotland                                 | 1029                      | 12.7 | 4231                       | 12.7 | 1.09 (0.96-1.23) |         |
| Northern Ireland                         | 279                       | 3.4  | 1749                       | 5.2  | 0.69 (0.57-0.83) |         |
| <b>Time since NVAF diagnosis</b>         |                           |      |                            |      |                  | <.0001  |
| < 6 months                               | 592                       | 7.3  | 2121                       | 6.3  | Reference        |         |
| 6 to 12 months                           | 427                       | 5.3  | 2175                       | 6.5  | 0.71 (0.61-0.82) |         |
| 12 to 24 months                          | 864                       | 10.6 | 3886                       | 11.6 | 0.82 (0.71-0.94) |         |
| 2 to 5 years                             | 2086                      | 25.7 | 8496                       | 25.4 | 0.93 (0.82-1.06) |         |
| ≥ 5 years                                | 4159                      | 51.2 | 16735                      | 50.1 | 1.07 (0.94-1.23) |         |
| <b>Previous OAC treatment</b>            |                           |      |                            |      |                  | <.0001  |
| No previous OAC                          | 5137                      | 63.2 | 21189                      | 63.4 | Reference        |         |
| NOAC only                                | 189                       | 2.3  | 411                        | 1.2  | 1.82 (1.36-2.43) |         |
| VKA and NOAC                             | 159                       | 2.0  | 490                        | 1.5  | 1.50 (1.23-1.84) |         |
| VKA only                                 | 2643                      | 32.5 | 11323                      | 33.9 | 0.97 (0.88-1.07) |         |
| <b>Previous stroke/TIA/ arterial TE</b>  | 968                       | 11.9 | 7341                       | 22.0 | 0.55 (0.48-0.64) | <.0001  |
| <b>Congestive heart failure</b>          | 889                       | 10.9 | 6685                       | 20.0 | 0.76 (0.69-0.84) | <.0001  |

Management of NVAF in Europe and the UK

| Parameter                               | No antithrombotic therapy |       | Treated with anticoagulant |      | OR (95% CI)       | P-value |
|-----------------------------------------|---------------------------|-------|----------------------------|------|-------------------|---------|
|                                         | N=8,128                   |       | N= 33,413                  |      |                   |         |
|                                         | n                         | %     | n                          | %    |                   |         |
| <b>Previous coronary artery disease</b> | 1212                      | 14.9  | 9636                       | 28.8 | 0.76 (0.70-0.84)  | <.0001  |
| <b>Hypertension</b>                     | 7695                      | 94.7  | 32869                      | 98.4 | 0.62 (0.53-0.72)  | <.0001  |
| <b>CHA2DS2-VASc score</b>               |                           |       |                            |      |                   | <.0001  |
| 2                                       | 2212                      | 27.2  | 3444                       | 10.3 | Reference         |         |
| 3                                       | 2034                      | 25    | 7482                       | 22.4 | 0.48 (0.43-0.54)  |         |
| 4                                       | 2057                      | 25.3  | 9656                       | 28.9 | 0.33 (0.28-0.39)  |         |
| 5                                       | 987                       | 12.1  | 6544                       | 19.6 | 0.28 (0.22-0.35)  |         |
| ≥6                                      | 838                       | 10.27 | 6287                       | 18.9 | 0.27 (0.20-0.36)  |         |
| <b>Previous bleed</b>                   |                           |       |                            |      |                   | <.0001  |
| No bleed                                | 5382                      | 66.2  | 21577                      | 64.6 | Reference         |         |
| IC bleed                                | 289                       | 3.6   | 404                        | 1.2  | 8.03 (6.43-10.02) |         |
| GI bleed                                | 1016                      | 12.5  | 4001                       | 11.8 | 1.24 (1.14-1.35)  |         |
| Other bleed                             | 1441                      | 17.7  | 7473                       | 22.4 | 0.91 (0.85-0.97)  |         |
| <b>History of peptic ulcer</b>          | 465                       | 5.7   | 1743                       | 5.2  | 1.36 (1.21-1.52)  | <.0001  |
| <b>History of anaemia</b>               | 227                       | 2.8   | 880                        | 2.6  | 1.44 (1.24-1.67)  | <.0001  |
| <b>History of fall</b>                  | 2097                      | 25.8  | 8211                       | 24.6 | 1.20 (1.13-1.28)  | <.0001  |
| <b>Renal disease</b>                    | 2148                      | 26.4  | 11542                      | 34.5 | 0.90 (0.84-0.96)  | 0.0016  |
| <b>Liver disease</b>                    | 109                       | 1.3   | 214                        | 0.6  | 2.39 (1.87-3.05)  | <.0001  |
| <b>Active cancer</b>                    | 455                       | 3.9   | 1367                       | 4.1  | 1.19 (1.06-1.35)  | 0.0053  |
| <b>Number of co-medications</b>         |                           |       |                            |      |                   | <.0001  |
| < 5                                     | 3384                      | 41.6  | 6879                       | 20.6 | Reference         |         |
| 5 to 9                                  | 2791                      | 34.3  | 14825                      | 44.4 | 0.49 (0.45-0.52)  |         |
| 10 to 14                                | 1271                      | 15.6  | 7782                       | 23.3 | 0.46 (0.43-0.50)  |         |
| ≥15                                     | 682                       | 8.4   | 3927                       | 11.8 | 0.53 (0.48-0.59)  |         |

Abbreviations: CI, confidence interval; GEE, generalised estimating equations; VKA, vitamin K antagonist; OAC, oral anticoagulant; NVAF, non-valvular atrial fibrillation; TIA, transient ischaemic attack; TE, thromboembolism; OR, odds ratio; NOAC, novel oral anticoagulant

1  
2  
3  
4  
5  
6  
7  
8  
9  
10  
11  
12  
13  
14  
15  
16  
17  
18  
19  
20  
21  
22  
23  
24  
25  
26  
27  
28  
29  
30  
31  
32  
33  
34  
35  
36  
37  
38  
39  
40  
41  
42  
43  
44  
45  
46  
47  
48  
49  
50  
51  
52  
53  
54  
55  
56  
57  
58  
59  
60

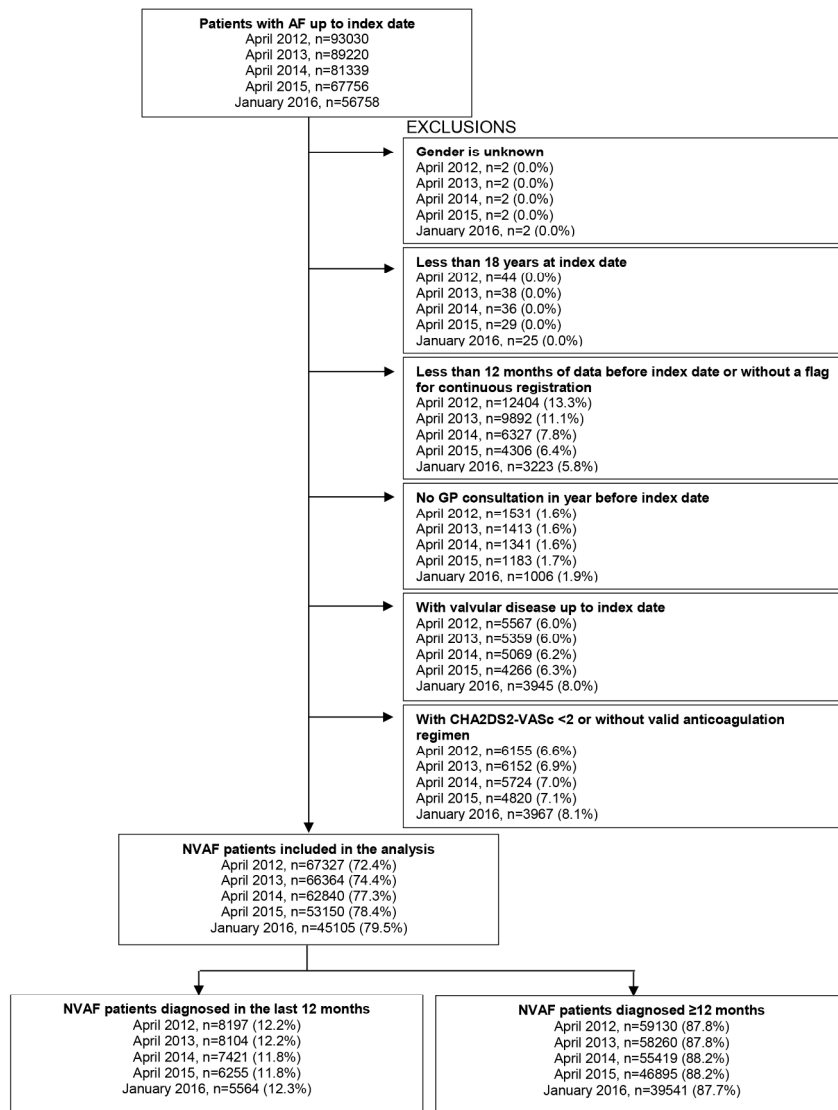

172x246mm (300 x 300 DPI)

1  
2  
3  
4  
5  
6  
7  
8  
9  
10  
11  
12  
13  
14  
15  
16  
17  
18  
19  
20  
21  
22  
23  
24  
25  
26  
27  
28  
29  
30  
31  
32  
33  
34  
35  
36  
37  
38  
39  
40  
41  
42  
43  
44  
45  
46  
47  
48  
49  
50  
51  
52  
53  
54  
55  
56  
57  
58  
59  
60

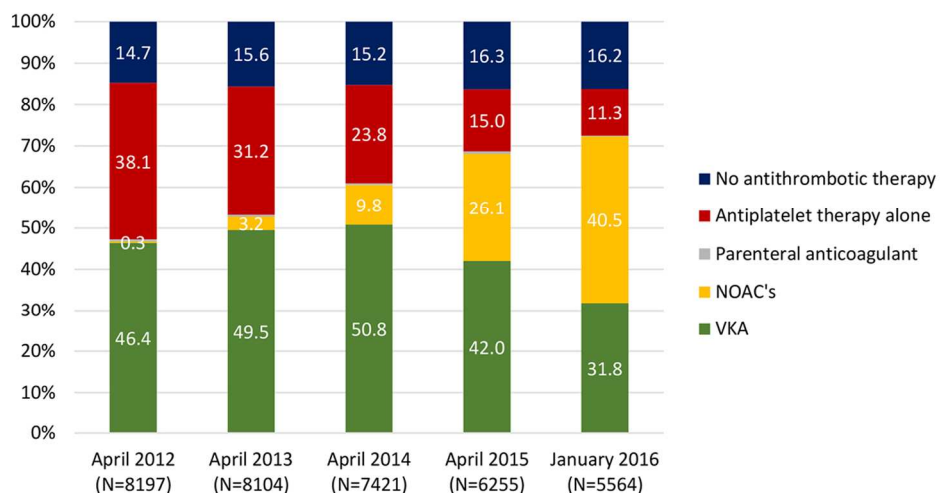

113x60mm (300 x 300 DPI)

review only

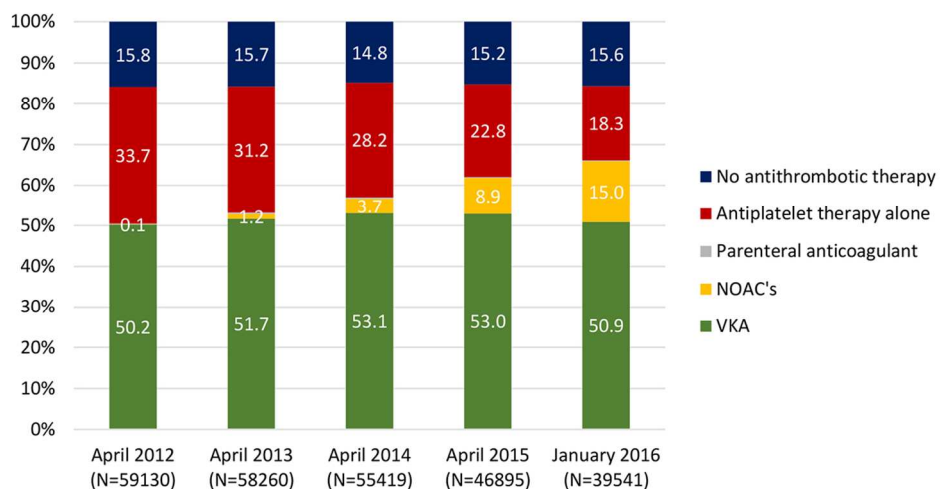

Figure 2

113x59mm (300 x 300 DPI)

review only

1  
2  
3  
4  
5  
6  
7  
8  
9  
10  
11  
12  
13  
14  
15  
16  
17  
18  
19  
20  
21  
22  
23  
24  
25  
26  
27  
28  
29  
30  
31  
32  
33  
34  
35  
36  
37  
38  
39  
40  
41  
42  
43  
44  
45  
46  
47  
48  
49  
50  
51  
52  
53  
54  
55  
56  
57  
58  
59  
60

1  
2  
3  
4  
5  
6  
7  
8  
9  
10  
11  
12  
13  
14  
15  
16  
17  
18  
19  
20  
21  
22  
23  
24  
25  
26  
27  
28  
29  
30  
31  
32  
33  
34  
35  
36  
37  
38  
39  
40  
41  
42  
43  
44  
45  
46  
47  
48  
49  
50  
51  
52  
53  
54  
55  
56  
57  
58  
59  
60

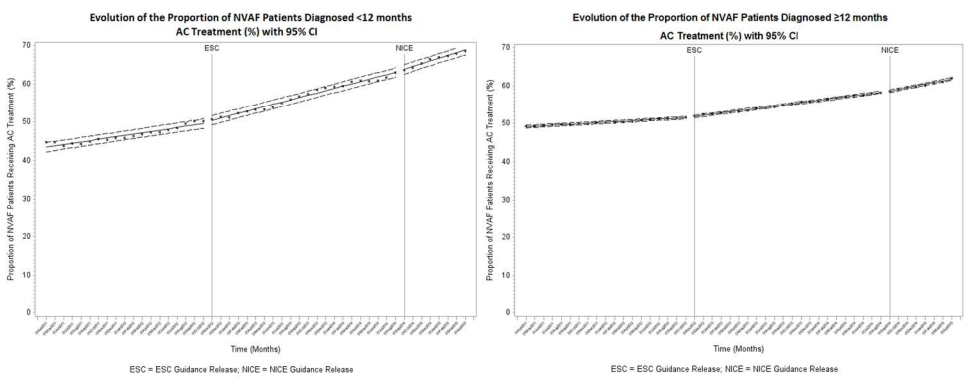

172x68mm (300 x 300 DPI)

Peer review only



1  
2  
3  
4  
5  
6  
7  
8  
9  
10  
11  
12  
13  
14  
15  
16  
17  
18  
19  
20  
21  
22  
23  
24  
25  
26  
27  
28  
29  
30  
31  
32  
33  
34  
35  
36  
37  
38  
39  
40  
41  
42  
43  
44  
45  
46  
47  
48  
49  
50  
51  
52  
53  
54  
55  
56  
57  
58  
59  
60

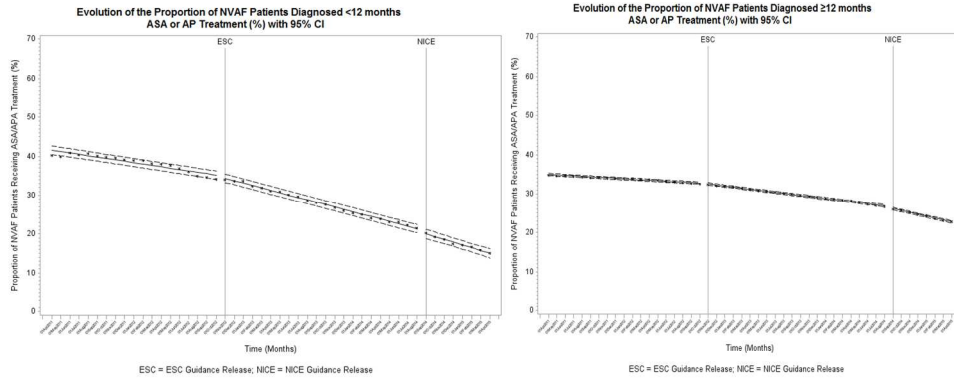

172x70mm (300 x 300 DPI)

Peer review only

1  
2  
3  
4  
5  
6  
7  
8  
9  
10  
11  
12  
13  
14  
15  
16  
17  
18  
19  
20  
21  
22  
23  
24  
25  
26  
27  
28  
29  
30  
31  
32  
33  
34  
35  
36  
37  
38  
39  
40  
41  
42  
43  
44  
45  
46  
47  
48  
49  
50  
51  
52  
53  
54  
55  
56  
57  
58  
59  
60

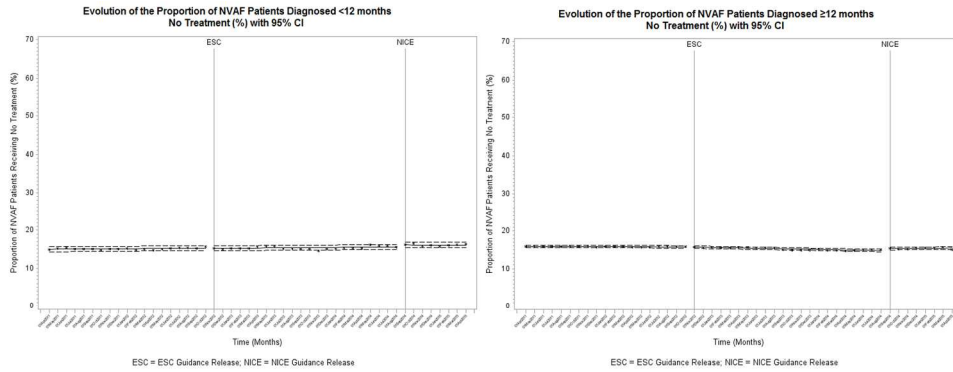

172x70mm (300 x 300 DPI)

Peer review only

1 Management of NVAf in Europe and the UK  
 2  
 3

4 **DATA SUPPLEMENT**  
 5

6 **Table s1. READ code descriptions**  
 7

|                  |                                                           |
|------------------|-----------------------------------------------------------|
| 8 <b>G11..00</b> | <b>Mitral valve diseases</b>                              |
| 9 G540.15        | Mitral valve prolapse                                     |
| 10 G110.00       | Mitral stenosis                                           |
| 11 G540.00       | Mitral valve incompetence                                 |
| 12 G541.00       | Aortic valve disorders                                    |
| 13 G540000       | Mitral incompetence, non-rheumatic                        |
| 14 G130.00       | Mitral and aortic stenosis                                |
| 15 G13..00       | Diseases of mitral and aortic valves                      |
| 16 G541400       | Aortic valve stenosis with insufficiency                  |
| 17 G131.14       | Mitral stenosis and aortic regurgitation                  |
| 18 G544200       | Combined disorders of mitral, aortic and tricuspid valves |
| 19 G541z00       | Aortic valve disorders NOS                                |
| 20 G544100       | Disorders of both mitral and tricuspid valves             |
| 21 G540z00       | Mitral valve disorders NOS                                |
| 22 G113.00       | Nonrheumatic mitral valve stenosis                        |
| 23 G13z.00       | Mitral and aortic valve disease NOS                       |
| 24 G11z.00       | Mitral valve disease NOS                                  |
| 25 G133.00       | Mitral and aortic incompetence                            |
| 26 G132.12       | Mitral incompetence and aortic stenosis                   |
| 27 G540200       | Mitral valve prolapse                                     |
| 28 G132.00       | Mitral insufficiency and aortic stenosis                  |
| 29 G132.13       | Mitral regurgitation and aortic stenosis                  |
| 30 G540100       | Mitral incompetence, cause unspecified                    |
| 31 G540300       | Mitral valve leaf prolapse                                |
| 32 G544.00       | Multiple valve diseases                                   |
| 33 G540.12       | Mitral valve insufficiency                                |
| 34 G112.13       | Mitral stenosis with regurgitation                        |
| 35 G112.00       | Mitral stenosis with insufficiency                        |
| 36 Gyu5600       | [X]Other aortic valve disorders                           |
| 37 G131.00       | Mitral stenosis and aortic insufficiency                  |
| 38 G12z.00       | Rheumatic aortic valve disease NOS                        |
| 39 G112.12       | Mitral stenosis with incompetence                         |
| 40 Gyu1000       | [X]Other mitral valve diseases                            |
| 41 P65..00       | Congenital mitral stenosis                                |

## Management of NVAF in Europe and the UK

|    |                                                    |                                                            |
|----|----------------------------------------------------|------------------------------------------------------------|
| 1  |                                                    |                                                            |
| 2  |                                                    |                                                            |
| 3  |                                                    |                                                            |
| 4  | G544X00                                            | Multiple valve disease, unspecified                        |
| 5  | G114.00                                            | Ruptured mitral valve cusp                                 |
| 6  |                                                    |                                                            |
| 7  | G131.13                                            | Mitral stenosis and aortic incompetence                    |
| 8  | P66..00                                            | Congenital mitral insufficiency                            |
| 9  |                                                    |                                                            |
| 10 | P652.00                                            | Parachute deformity of the mitral valve                    |
| 11 | G13y.00                                            | Multiple mitral and aortic valve involvement               |
| 12 |                                                    |                                                            |
| 13 | Gyu5A00                                            | [X]Aortic valve disorders in diseases classified elsewhere |
| 14 | P650.00                                            | Congenital mitral stenosis, unspecified                    |
| 15 | G133.11                                            | Mitral and aortic insufficiency                            |
| 16 | Gyu5500                                            | [X]Other nonrheumatic mitral valve disorders               |
| 17 |                                                    |                                                            |
| 18 | P65z.00                                            | Congenital mitral stenosis NOS                             |
| 19 | Gyu5D00                                            | [X]Multiple valve disorders/diseases CE                    |
| 20 |                                                    |                                                            |
| 21 |                                                    |                                                            |
| 22 | <b>READ Codes for prosthetic valve description</b> |                                                            |
| 23 | 7911.12                                            | Replacement of aortic valve                                |
| 24 | P641.00                                            | Bicuspid aortic valve                                      |
| 25 |                                                    |                                                            |
| 26 | 7910300                                            | Replacement of mitral valve NEC                            |
| 27 |                                                    |                                                            |
| 28 | 7910.12                                            | Replacement of mitral valve                                |
| 29 |                                                    |                                                            |
| 30 | 7910.12                                            | Replacement of mitral valve                                |
| 31 | 7914300                                            | Replacement of valve of heart NEC                          |
| 32 |                                                    |                                                            |
| 33 | 7914200                                            | Prosthetic replacement of valve of heart NEC               |
| 34 | 7910.00                                            | Plastic repair of mitral valve                             |
| 35 |                                                    |                                                            |
| 36 | 7911.00                                            | Plastic repair of aortic valve                             |
| 37 |                                                    |                                                            |
| 38 | 7911300                                            | Replacement of aortic valve NEC                            |
| 39 | 7915000                                            | Revision of plastic repair of mitral valve                 |
| 40 | 7916000                                            | Open mitral valvotomy                                      |
| 41 | 7917000                                            | Closed mitral valvotomy                                    |
| 42 |                                                    |                                                            |
| 43 | 7910200                                            | Prosthetic replacement of mitral valve                     |
| 44 |                                                    |                                                            |
| 45 | 7910200                                            | Prosthetic replacement of mitral valve                     |
| 46 | 7910400                                            | Mitral valvuloplasty NEC                                   |
| 47 |                                                    |                                                            |
| 48 | ZV43300                                            | [V]Has artificial heart valve                              |
| 49 | 7914.11                                            | Replacement of unspecified valve of heart                  |
| 50 | 7910211                                            | Bjork-Shiley prosthetic replacement of mitral valve        |
| 51 |                                                    |                                                            |
| 52 | 7911200                                            | Prosthetic replacement of aortic valve                     |
| 53 |                                                    |                                                            |
| 54 | 7910.11                                            | Mitral valvuloplasty                                       |
| 55 | 7914212                                            | Starr prosthetic replacement of valve of heart             |
| 56 |                                                    |                                                            |
| 57 | 7911100                                            | Xenograft replacement of aortic valve                      |
| 58 |                                                    |                                                            |
| 59 |                                                    |                                                            |
| 60 |                                                    |                                                            |

## Management of NVAF in Europe and the UK

|         |                                                            |
|---------|------------------------------------------------------------|
| 7911y00 | Other specified plastic repair of aortic valve             |
| ZV45H00 | [V]Presence of prosthetic heart valve                      |
| 7910z00 | Plastic repair of mitral valve NOS                         |
| 7911000 | Allograft replacement of aortic valve                      |
| 7915100 | Revision of plastic repair of aortic valve                 |
| 7914211 | Edwards prosthetic replacement of valve of heart           |
| TB01200 | Implant of heart valve prosthesis + complication, no blame |
| 7910213 | Carpentier prosthetic replacement of mitral valve          |
| 7910100 | Xenograft replacement of mitral valve                      |
| 7919000 | Percutaneous transluminal mitral valvotomy                 |
| 7911z00 | Plastic repair of aortic valve NOS                         |
| 7910212 | Bjork-Shiley prosthetic replacement of mitral valve        |
| 7910y00 | Other specified plastic repair of mitral valve             |
| SP00200 | Mechanical complication of heart valve prosthesis          |
| SyuK611 | [X] Embolism from prosthetic heart valve                   |
| 790D700 | Replacement of valved cardiac conduit                      |
| 7914100 | Xenograft replacement of valve of heart NEC                |
| 7914000 | Allograft replacement of valve of heart NEC                |
| ZVu6e00 | [X]Presence of other heart valve replacement               |
| 7910214 | Edwards prosthetic replacement of mitral valve             |
| 7910411 | Mitral valve repair NEC                                    |
| 7911411 | Aortic valve repair NEC                                    |
| 7910000 | Allograft replacement of mitral valve                      |
| 7911600 | Transluminal aortic valve implantation                     |
| 7911500 | Transapical aortic valve implantation                      |
| 7914600 | Replacement of truncal valve                               |
| 7918000 | Annuloplasty of mitral valve                               |

Management of NVAf in Europe and the UK

**Table s2. Proportion of patients with NVAf treated in April 2012, 2013, 2014, and 2015 in the UK, according to duration of diagnosis**

|                                   | April 2012<br>% [95% CI] | April 2013<br>% [95% CI] | April 2014<br>% [95% CI] | April 2015<br>% [95% CI] | January 2016<br>% [95% CI] |
|-----------------------------------|--------------------------|--------------------------|--------------------------|--------------------------|----------------------------|
| <i>Diagnosed &lt; 12 months</i>   |                          |                          |                          |                          |                            |
| <b>Anticoagulation treatment</b>  | <b>47.2 [46.2-48.3]</b>  | <b>53.2 [52.1-54.2]</b>  | <b>61.0 [59.9-62.0]</b>  | <b>68.7 [67.6-69.8]</b>  | <b>72.5 [71.3-73.7]</b>    |
| VKA                               | 46.4 [45.4-47.4]         | 49.5 [48.5-50.6]         | 50.8 [49.7-51.9]         | 42.0 [40.8-43.1]         | 31.8 [30.6-33.0]           |
| Apixaban                          | -                        | -                        | 1.7 [1.5-2.0]            | 8.8 [8.1-9.5]            | 16.6 [15.6-17.5]           |
| Rivaroxaban                       | -                        | 1.2 [1.0-1.5]            | 5.5 [5.0-6.0]            | 14.5 [13.7-15.3]         | 21.5 [20.4-22.6]           |
| Dabigatran                        | 0.3 [0.2-0.4]            | 2.0 [1.7-2.3]            | 2.6 [2.3-2.9]            | 2.8 [2.5-3.2]            | 2.4 [2.0-2.8]              |
| Parenteral anticoagulant          | 0.5 [0.4-0.6]            | 0.5 [0.3-0.6]            | 0.4 [0.2-0.5]            | 0.6 [0.4-0.8]            | 0.2 [0.1-0.4]              |
| <b>Antiplatelet therapy alone</b> | <b>38.1 [37-39.1]</b>    | <b>31.2 [30.2-32.1]</b>  | <b>23.8 [22.9-24.8]</b>  | <b>15 [14.2-15.9]</b>    | <b>11.3 [10.5-12.1]</b>    |
| <b>No antithrombotic therapy</b>  | <b>14.7 [14-15.4]</b>    | <b>15.6 [14.9-16.4]</b>  | <b>15.2 [14.4-16]</b>    | <b>16.3 [15.4-17.2]</b>  | <b>16.2 [15.2-17.1]</b>    |
| <i>Diagnosed ≥ 12 months</i>      |                          |                          |                          |                          |                            |
| <b>Anticoagulation treatment</b>  | <b>50.6 [50.2-51.0]</b>  | <b>53.2 [52.8-53.5]</b>  | <b>57.0 [56.6-57.4]</b>  | <b>62.1 [61.7-62.5]</b>  | <b>66.1 [65.6-66.6]</b>    |
| VKA                               | 50.2 [49.8-50.6]         | 51.7 [51.3-52.1]         | 53.1 [52.7-53.5]         | 53.0 [52.5-53.4]         | 50.9 [50.4-51.4]           |
| Apixaban                          | -                        | -                        | 0.4 [0.3-0.4]            | 2.0 [1.9-2.1]            | 4.5 [4.3-4.7]              |
| Rivaroxaban                       | -                        | 0.5 [0.4-0.5]            | 1.9 [1.8-2.0]            | 4.9 [4.7-5.1]            | 8.3 [8.0-8.6]              |
| Dabigatran                        | 0.1 [0.1-0.1]            | 0.7 [0.7-0.8]            | 1.4 [1.3-1.5]            | 2.0 [1.9-2.1]            | 2.2 [2.1-2.4]              |
| Parenteral anticoagulant          | 0.2 [0.2-0.3]            | 0.3 [0.2-0.3]            | 0.3 [0.2-0.3]            | 0.2 [0.2-0.3]            | 0.2 [0.2-0.3]              |
| <b>Antiplatelet therapy alone</b> | <b>33.7 [33.3-34.0]</b>  | <b>31.2 [30.8-31.5]</b>  | <b>28.2 [27.8-28.5]</b>  | <b>22.8 [22.4-23.1]</b>  | <b>18.3 [17.9-18.7]</b>    |
| <b>No antithrombotic therapy</b>  | <b>15.8 [15.5-16.0]</b>  | <b>15.7 [15.4-16.0]</b>  | <b>14.8 [14.5-15.1]</b>  | <b>15.2 [14.8-15.5]</b>  | <b>15.6 [15.3-16.0]</b>    |

Abbreviations: CI, confidence interval; VKA, vitamin K antagonists

Management of NVAf in Europe and the UK

**Table s3. Proportion of patients with NVAf treated in April 2012, 2013, 2014, and 2015 in the UK, according to country of residence**

|                                   | April 2012<br>% [95% CI] | April 2013<br>% [95% CI] | April 2014<br>% [95% CI] | April 2015<br>% [95% CI] | January 2016<br>% [95% CI] |
|-----------------------------------|--------------------------|--------------------------|--------------------------|--------------------------|----------------------------|
| <b>England</b>                    |                          |                          |                          |                          |                            |
| <b>Anticoagulation treatment</b>  | <b>49.6 [49.2-50]</b>    | <b>52.4 [52-52.9]</b>    | <b>56.9 [56.5-57.4]</b>  | <b>62.1 [61.6-62.5]</b>  | <b>66.5 [66.0-67.1]</b>    |
| VKA                               | 49.2 [48.8-49.6]         | 50.8 [50.4-51.2]         | 52.4 [51.9-52.8]         | 51.3 [50.8-51.8]         | 47.9 [47.4-48.5]           |
| Apixaban                          | -                        | -                        | 0.4 [0.4-0.5]            | 2.3 [2.2-2.5]            | 5.0 [4.8-5.3]              |
| Rivaroxaban                       | -                        | 0.5 [0.4-0.5]            | 2.1 [2.0-2.2]            | 5.7 [5.5-5.9]            | 10.7 [10.3-11.0]           |
| Dabigatran                        | 0.1 [0.1-0.1]            | 0.9 [0.8-1.0]            | 1.7 [1.6-1.8]            | 2.4 [2.3-2.6]            | 2.6 [2.4-2.8]              |
| Parenteral anticoagulant          | 0.3 [0.2-0.3]            | 0.3 [0.2-0.3]            | 0.3 [0.3-0.4]            | 0.3 [0.3-0.4]            | 0.2 [0.2-0.3]              |
| <b>Antiplatelet therapy alone</b> | <b>33.9 [33.5-34.3]</b>  | <b>30.9 [30.6-31.3]</b>  | <b>27.5 [27.1-27.9]</b>  | <b>21.9 [21.4-22.3]</b>  | <b>17.0 [16.5-17.4]</b>    |
| <b>No antithrombotic therapy</b>  | <b>16.5 [16.2-16.8]</b>  | <b>16.6 [16.3-16.9]</b>  | <b>15.6 [15.3-15.9]</b>  | <b>16.1 [15.7-16.4]</b>  | <b>16.5 [16.1-17.0]</b>    |
| <b>Scotland</b>                   |                          |                          |                          |                          |                            |
| <b>Anticoagulation treatment</b>  | <b>48.8 [47.7-49.9]</b>  | <b>51.9 [50.8-53]</b>    | <b>55.5 [54.4-56.6]</b>  | <b>61.8 [60.7-62.9]</b>  | <b>64.3 [63.2-65.4]</b>    |
| VKA                               | 48.2 [47.1-49.3]         | 49.2 [48.1-50.3]         | 49.1 [48.0-50.2]         | 48.4 [47.2-49.5]         | 45.2 [44-46.3]             |
| Apixaban                          | -                        | -                        | 0.5 [0.3-0.6]            | 2.7 [2.3-3.0]            | 6.6 [6.0-7.2]              |
| Rivaroxaban                       | -                        | 1.8 [1.5-2.0]            | 5.0 [4.5-5.4]            | 9.8 [9.1-10.5]           | 11.6 [10.8-12.3]           |
| Dabigatran                        | 0.4 [0.2-0.5]            | 0.5 [0.4-0.7]            | 0.7 [0.5-0.8]            | 0.7 [0.5-0.8]            | 0.8 [0.6-1.0]              |
| Parenteral anticoagulant          | 0.2 [0.1-0.3]            | 0.4 [0.2-0.5]            | 0.3 [0.2-0.4]            | 0.2 [0.1-0.3]            | 0.1 [0.1-0.2]              |
| <b>Antiplatelet therapy alone</b> | <b>37 [35.9-38.1]</b>    | <b>33.6 [32.6-34.7]</b>  | <b>29.6 [28.6-30.6]</b>  | <b>23.2 [22.3-24.2]</b>  | <b>19.9 [19.0-20.8]</b>    |
| <b>No antithrombotic therapy</b>  | <b>14.2 [13.4-15.0]</b>  | <b>14.5 [13.7-15.3]</b>  | <b>14.9 [14.2-15.7]</b>  | <b>15 [14.2-15.8]</b>    | <b>15.8 [14.9-16.6]</b>    |
| <b>Wales</b>                      |                          |                          |                          |                          |                            |
| <b>Anticoagulation treatment</b>  | <b>55.1 [54.0-56.2]</b>  | <b>58.7 [57.7-59.8]</b>  | <b>61.7 [60.6-62.7]</b>  | <b>66.6 [65.5-67.7]</b>  | <b>69.1 [68.0-70.2]</b>    |
| VKA                               | 54.8 [53.7-55.9]         | 57.6 [56.5-58.7]         | 59.1 [58.0-60.1]         | 59.3 [58.1-60.4]         | 57.6 [56.5-58.8]           |
| Apixaban                          | -                        | 0.0 [0.0-0.1]            | 0.3 [0.2-0.4]            | 2.2 [1.9-2.5]            | 3.9 [3.4-4.3]              |
| Rivaroxaban                       | -                        | 0.1 [0.0-0.2]            | 0.9 [0.7-1.1]            | 3.2 [2.8-3.6]            | 5.1 [4.6-5.6]              |
| Dabigatran                        | 0.0 [0.0-0.1]            | 0.9 [0.6-1.1]            | 1.3 [1.1-1.5]            | 1.9 [1.6-2.2]            | 2.3 [2.0-2.7]              |
| Parenteral anticoagulant          | 0.2 [0.1-0.3]            | 0.2 [0.1-0.3]            | 0.1 [0.1-0.2]            | 0.1 [0.0-0.1]            | 0.2 [0.1-0.2]              |
| <b>Antiplatelet therapy alone</b> | <b>32.5 [31.5-33.6]</b>  | <b>29.4 [28.4-30.4]</b>  | <b>26.7 [25.8-27.7]</b>  | <b>20.4 [19.4-21.3]</b>  | <b>16.8 [15.9-17.7]</b>    |
| <b>No antithrombotic therapy</b>  | <b>12.4 [11.6-13.1]</b>  | <b>11.9 [11.2-12.6]</b>  | <b>11.6 [10.9-12.3]</b>  | <b>13.0 [12.2-13.8]</b>  | <b>14.1 [13.3-14.9]</b>    |
| <b>Northern Ireland</b>           |                          |                          |                          |                          |                            |
| <b>Anticoagulation treatment</b>  | <b>51.5 [49.6-53.5]</b>  | <b>55 [53.0-56.9]</b>    | <b>60.8 [59.0-62.7]</b>  | <b>67.3 [65.6-69.0]</b>  | <b>71.9 [70.2-73.6]</b>    |
| VKA                               | 50.7 [48.7-52.7]         | 52.4 [50.4-54.3]         | 51.5 [49.6-53.4]         | 46 [44.2-47.9]           | 39.7 [37.9-41.6]           |
| Apixaban                          | -                        | 0.1 [0.0-0.2]            | 3.1 [2.4-3.7]            | 11.1 [10.0-12.3]         | 19.1 [17.6-20.6]           |
| Rivaroxaban                       | -                        | 0.4 [0.1-0.6]            | 3.5 [2.8-4.2]            | 7.5 [6.5-8.4]            | 10.7 [9.5-11.8]            |
| Dabigatran                        | 0.5 [0.2-0.8]            | 1.6 [1.1-2.1]            | 2.5 [1.9-3.1]            | 2.3 [1.8-2.9]            | 2.1 [1.6-2.7]              |

## Management of NVAF in Europe and the UK

|                                   | April 2012              | April 2013              | April 2014              | April 2015             | January 2016            |
|-----------------------------------|-------------------------|-------------------------|-------------------------|------------------------|-------------------------|
|                                   | % [95% CI]              | % [95% CI]              | % [95% CI]              | % [95% CI]             | % [95% CI]              |
| Parenteral anticoagulant          | 0.3 [0.1-0.5]           | 0.6 [0.3-0.8]           | 0.2 [0.1-0.4]           | 0.3 [0.1-0.6]          | 0.3 [0.1-0.5]           |
| <b>Antiplatelet therapy alone</b> | <b>37.9 [35.9-39.8]</b> | <b>34.1 [32.2-35.9]</b> | <b>28.2 [26.4-29.9]</b> | <b>22 [20.4-23.5]</b>  | <b>17.2 [15.8-18.6]</b> |
| <b>No antithrombotic therapy</b>  | <b>10.6 [9.4-11.8]</b>  | <b>11 [9.8-12.2]</b>    | <b>11.0 [9.8-12.2]</b>  | <b>10.7 [9.6-11.9]</b> | <b>10.9 [9.8-12.1]</b>  |

Abbreviations: CI, confidence interval; VKA, vitamin K antagonists

For peer review only - Highly Confidential



**STROBE 2007 (v4) checklist of items to be included in reports of observational studies in epidemiology\***  
**Checklist for cohort, case-control, and cross-sectional studies (combined)**

| Section/Topic             | Item # | Recommendation                                                                                                                                                                                                                                                                                                                                                                                                                                                         | Reported on page # |
|---------------------------|--------|------------------------------------------------------------------------------------------------------------------------------------------------------------------------------------------------------------------------------------------------------------------------------------------------------------------------------------------------------------------------------------------------------------------------------------------------------------------------|--------------------|
| Title and abstract        | 1      | (a) Indicate the study's design with a commonly used term in the title or the abstract                                                                                                                                                                                                                                                                                                                                                                                 | 2                  |
|                           |        | (b) Provide in the abstract an informative and balanced summary of what was done and what was found                                                                                                                                                                                                                                                                                                                                                                    | 2                  |
| <b>Introduction</b>       |        |                                                                                                                                                                                                                                                                                                                                                                                                                                                                        |                    |
| Background/rationale      | 2      | Explain the scientific background and rationale for the investigation being reported                                                                                                                                                                                                                                                                                                                                                                                   | 4                  |
| Objectives                | 3      | State specific objectives, including any pre-specified hypotheses                                                                                                                                                                                                                                                                                                                                                                                                      | 4                  |
| <b>Methods</b>            |        |                                                                                                                                                                                                                                                                                                                                                                                                                                                                        |                    |
| Study design              | 4      | Present key elements of study design early in the paper                                                                                                                                                                                                                                                                                                                                                                                                                | 4-5                |
| Setting                   | 5      | Describe the setting, locations, and relevant dates, including periods of recruitment, exposure, follow-up, and data collection                                                                                                                                                                                                                                                                                                                                        | 4-5                |
| Participants              | 6      | (a) <i>Cohort study</i> —Give the eligibility criteria, and the sources and methods of selection of participants. Describe methods of follow-up<br><i>Case-control study</i> —Give the eligibility criteria, and the sources and methods of case ascertainment and control selection. Give the rationale for the choice of cases and controls<br><i>Cross-sectional study</i> —Give the eligibility criteria, and the sources and methods of selection of participants | 5                  |
|                           |        | (b) <i>Cohort study</i> —For matched studies, give matching criteria and number of exposed and unexposed<br><i>Case-control study</i> —For matched studies, give matching criteria and the number of controls per case                                                                                                                                                                                                                                                 | n/a                |
| Variables                 | 7      | Clearly define all outcomes, exposures, predictors, potential confounders, and effect modifiers. Give diagnostic criteria, if applicable                                                                                                                                                                                                                                                                                                                               | 5                  |
| Data sources/ measurement | 8*     | For each variable of interest, give sources of data and details of methods of assessment (measurement). Describe comparability of assessment methods if there is more than one group                                                                                                                                                                                                                                                                                   | 4-5                |
| Bias                      | 9      | Describe any efforts to address potential sources of bias                                                                                                                                                                                                                                                                                                                                                                                                              | 6                  |
| Study size                | 10     | Explain how the study size was arrived at                                                                                                                                                                                                                                                                                                                                                                                                                              | 5                  |
| Quantitative variables    | 11     | Explain how quantitative variables were handled in the analyses. If applicable, describe which groupings were chosen and why                                                                                                                                                                                                                                                                                                                                           | 5-6                |
| Statistical methods       | 12     | (a) Describe all statistical methods, including those used to control for confounding                                                                                                                                                                                                                                                                                                                                                                                  | 6                  |
|                           |        | (b) Describe any methods used to examine subgroups and interactions                                                                                                                                                                                                                                                                                                                                                                                                    | n/a                |
|                           |        | (c) Explain how missing data were addressed                                                                                                                                                                                                                                                                                                                                                                                                                            | n/a                |
|                           |        | (d) <i>Cohort study</i> —If applicable, explain how loss to follow-up was addressed<br><i>Case-control study</i> —If applicable, explain how matching of cases and controls was addressed                                                                                                                                                                                                                                                                              |                    |

|                          |     |                                                                                                                                                                                                              |              |
|--------------------------|-----|--------------------------------------------------------------------------------------------------------------------------------------------------------------------------------------------------------------|--------------|
|                          |     | <i>Cross-sectional study</i> —If applicable, describe analytical methods taking account of sampling strategy                                                                                                 |              |
|                          |     | (e) Describe any sensitivity analyses                                                                                                                                                                        | 10           |
| <b>Results</b>           |     |                                                                                                                                                                                                              |              |
| Participants             | 13* | (a) Report numbers of individuals at each stage of study—eg numbers potentially eligible, examined for eligibility, confirmed eligible, included in the study, completing follow-up, and analysed            | 20           |
|                          |     | (b) Give reasons for non-participation at each stage                                                                                                                                                         | 20           |
|                          |     | (c) Consider use of a flow diagram                                                                                                                                                                           | 20           |
| Descriptive data         | 14* | (a) Give characteristics of study participants (eg demographic, clinical, social) and information on exposures and potential confounders                                                                     | 16           |
|                          |     | (b) Indicate number of participants with missing data for each variable of interest                                                                                                                          | 16           |
|                          |     | (c) <i>Cohort study</i> —Summarise follow-up time (eg, average and total amount)                                                                                                                             | n/a          |
| Outcome data             | 15* | <i>Cohort study</i> —Report numbers of outcome events or summary measures over time                                                                                                                          | n/a          |
|                          |     | <i>Case-control study</i> —Report numbers in each exposure category, or summary measures of exposure                                                                                                         | n/a          |
|                          |     | <i>Cross-sectional study</i> —Report numbers of outcome events or summary measures                                                                                                                           | 6, 16, 17-19 |
| Main results             | 16  | (a) Give unadjusted estimates and, if applicable, confounder-adjusted estimates and their precision (eg, 95% confidence interval). Make clear which confounders were adjusted for and why they were included | 17           |
|                          |     | (b) Report category boundaries when continuous variables were categorized                                                                                                                                    | 18-19        |
|                          |     | (c) If relevant, consider translating estimates of relative risk into absolute risk for a meaningful time period                                                                                             | n/a          |
| Other analyses           | 17  | Report other analyses done—eg analyses of subgroups and interactions, and sensitivity analyses                                                                                                               | 10           |
| <b>Discussion</b>        |     |                                                                                                                                                                                                              |              |
| Key results              | 18  | Summarise key results with reference to study objectives                                                                                                                                                     | 8            |
| Limitations              | 19  | Discuss limitations of the study, taking into account sources of potential bias or imprecision. Discuss both direction and magnitude of any potential bias                                                   | 10           |
| Interpretation           | 20  | Give a cautious overall interpretation of results considering objectives, limitations, multiplicity of analyses, results from similar studies, and other relevant evidence                                   | 9-10         |
| Generalisability         | 21  | Discuss the generalisability (external validity) of the study results                                                                                                                                        | 10           |
| <b>Other information</b> |     |                                                                                                                                                                                                              |              |
| Funding                  | 22  | Give the source of funding and the role of the funders for the present study and, if applicable, for the original study on which the present article is based                                                | 1            |

\*Give information separately for cases and controls in case-control studies and, if applicable, for exposed and unexposed groups in cohort and cross-sectional studies.

**Note:** An Explanation and Elaboration article discusses each checklist item and gives methodological background and published examples of transparent reporting. The STROBE checklist is best used in conjunction with this article (freely available on the Web sites of PLoS Medicine at <http://www.plosmedicine.org/>, Annals of Internal Medicine at <http://www.annals.org/>, and Epidemiology at <http://www.epidem.com/>). Information on the STROBE Initiative is available at [www.strobe-statement.org](http://www.strobe-statement.org).

# BMJ Open

## The evolving landscape of stroke prevention in atrial fibrillation within the United Kingdom between 2012 and 2016

|                                 |                                                                                                                                                                                                                                                                                                                                                                                                                                                                                                                                                                           |
|---------------------------------|---------------------------------------------------------------------------------------------------------------------------------------------------------------------------------------------------------------------------------------------------------------------------------------------------------------------------------------------------------------------------------------------------------------------------------------------------------------------------------------------------------------------------------------------------------------------------|
| Journal:                        | <i>BMJ Open</i>                                                                                                                                                                                                                                                                                                                                                                                                                                                                                                                                                           |
| Manuscript ID                   | bmjopen-2016-015363.R1                                                                                                                                                                                                                                                                                                                                                                                                                                                                                                                                                    |
| Article Type:                   | Research                                                                                                                                                                                                                                                                                                                                                                                                                                                                                                                                                                  |
| Date Submitted by the Author:   | 07-Mar-2017                                                                                                                                                                                                                                                                                                                                                                                                                                                                                                                                                               |
| Complete List of Authors:       | Lacoin, Laure; Bristol-Myers Squibb<br>Lumley, Matthew; Pfizer<br>Ridha, Essra; Bristol-Myers Squibb<br>Pereira, Marta; Evidera<br>McDonald, Laura; Evidera,<br>Ramagopalan, Sreeram; Evidera<br>Lefèvre, Cinira; Bristol-Myers Squibb France, Worldwide Health Economics & Outcomes Research<br>Evans, David; Bristol-Myers Squibb France, Worldwide Health Economics & Outcomes Research<br>Halcox, Julian; Swansea University College of Medicine, Institute of Life Sciences; Cardiff University School of Medicine, Institute of Molecular and Experimental Medicine |
| <b>Primary Subject Heading</b>: | Cardiovascular medicine                                                                                                                                                                                                                                                                                                                                                                                                                                                                                                                                                   |
| Secondary Subject Heading:      | Epidemiology                                                                                                                                                                                                                                                                                                                                                                                                                                                                                                                                                              |
| Keywords:                       | Atrial fibrillation, Drug therapy, Electronic health records, Great Britain, Stroke < NEUROLOGY                                                                                                                                                                                                                                                                                                                                                                                                                                                                           |
|                                 |                                                                                                                                                                                                                                                                                                                                                                                                                                                                                                                                                                           |

SCHOLARONE™  
Manuscripts

1  
2  
3 **The evolving landscape of stroke prevention in atrial fibrillation within the United Kingdom**  
4 **between 2012 and 2016**

5 L. Lacoïn,\*<sup>1</sup> M. Lumley,† E. Ridha,\* M. Pereira,‡<sup>1</sup> L. McDonald,‡ S. Ramagopalan,‡ C. Lefevre,§ D.  
6 Evans,<sup>1</sup> J. Halcox\*\*

7  
8 \* UK Medical Department, Bristol-Myers Squibb, Uxbridge, UK; † Medical Department, Pfizer,  
9 Tadworth, UK; ‡ Real-World Evidence, Evidera, London, UK; § Center of Observational Research and  
10 Data Sciences, Business Insights and Analytics, Bristol-Myers Squibb, Rueil Malmaison, France;  
11 WWHEOR Market, Bristol-Myers Squibb, Rueil Malmaison, France; \*\* Department of Cardiology,  
12 Swansea University, Cardiff UK

13  
14  
15 <sup>1</sup> Employee at time of the study

16  
17 **Correspondence to:** Professor Julian Halcox, Swansea University, Singleton Park Campus, Sketty,  
18 Swansea SA2 8PP, UK; tel 44 (0)1792 602938; [j.p.j.halcox@swansea.ac.uk](mailto:j.p.j.halcox@swansea.ac.uk)

19  
20 **Short title:** Evolving stroke prevention for NVAf in the UK

21  
22 **Word count:** 4000

23  
24 *"The Corresponding Author has the right to grant on behalf of all authors and does grant on behalf of*  
25 *all authors, [a worldwide licence](#) to the Publishers and its licensees in perpetuity, in all forms, formats*  
26 *and media (whether known now or created in the future), to i) publish, reproduce, distribute, display*  
27 *and store the Contribution, ii) translate the Contribution into other languages, create adaptations,*  
28 *reprints, include within collections and create summaries, extracts and/or, abstracts of the*  
29 *Contribution, iii) create any other derivative work(s) based on the Contribution, iv) to exploit all*  
30 *subsidiary rights in the Contribution, v) the inclusion of electronic links from the Contribution to third*  
31 *party material where-ever it may be located; and, vi) licence any third party to do any or all of the*  
32 *above."*

33  
34 **DISCLOSURE STATEMENTS**

35 All authors have completed the ICMJE uniform disclosure form. This study was funded by Bristol-  
36 Myers Squibb and Pfizer. Marta Pereira and Sreeram Ramagopalan were employees of Evidera who  
37 were paid consultants to Bristol-Myers Squibb and Pfizer in connection with conducting this study  
38 and with the development of this manuscript. DE, ER, and LL were BMS employees at the time of the  
39 research.  
40  
41  
42  
43  
44  
45  
46  
47  
48  
49  
50  
51  
52  
53  
54  
55  
56  
57  
58  
59  
60

## ABSTRACT

**Objective:** To describe the changes in prescribing of oral anticoagulant (AC) and antiplatelet (AP) agents in patients with non-valvular atrial fibrillation (NVAF) in the UK and to identify the characteristics associated with deviation from guideline-based recommendations.

**Design:** Five cross-sectional analyses in a large retrospective population-based cohort study.

**Setting:** General practices contributing data to the UK Clinical Practice Research Datalink.

**Participants:** The study included patients with a diagnosis of non-valvular atrial fibrillation (NVAF) and eligible for anticoagulation (CHA2DS2-VASc score  $\geq 2$ ) on 1st April of 2012, 2013, 2014, 2015 and 1st January 2016.

**Results:** The proportion of patients being treated with AC increased at each index date, showing an absolute rise of 16.7% over the study period. At the same time, the proportion of patients treated with an AP alone was reduced by half, showing an absolute decrease of 16.8%. The proportion of patients not receiving any antithrombotic (AT) treatment remained the same across the study period. A number of predictors were identified for AP alone or no treatment compared with AC treatment.

**Conclusion:** Major improvements in the AT management of patients with NVAF for stroke prevention in the UK were observed between April 2012 and January 2016. Despite this, nearly 20% of at-risk patients still received AP alone and over 15% were on no AT agents in January 2016.

## STRENGTHS AND LIMITATIONS

- A large representative population of patients with all forms of AF (paroxysmal, chronic) studied in the 'real-world' using data obtained from GP records in Clinical Research Practice Datalink (CPRD)
- Real-world data are more likely to reflect wider contemporary treatment practices than information obtained from registries
- Although CPRD is regularly and extensively audited to ensure data quality, the study is limited by the accuracy of GP records
- The completeness of the GP record is difficult to ascertain, and we may have not detected some individuals receiving AC prescriptions is secondary care

**Key words:** Atrial Fibrillation, Drug Therapy, Electronic Health Records, Great Britain, Stroke

## INTRODUCTION

Atrial fibrillation (AF) is the most common cardiac arrhythmia,[1] estimated to affect up to 35 million people worldwide,[2] with 1.4 million people affected in England alone.[3] AF is an independent risk factor for stroke, increasing the risk five-fold.[4]

Approximately 20% of stroke cases in the United Kingdom (UK) are thought to have AF as a contributing factor and AF-related strokes are more likely to be fatal or cause severe disability than non-AF-related strokes.[5, 6] However, AF-related strokes can be prevented and their impact minimised by effective management strategies including increased detection of AF, adherence to stroke prevention guidelines and anticoagulant (AC) use in at-risk patients.

Although anticoagulation is effective in preventing strokes due to AF, evidence suggests anticoagulation therapy remains underused.[7-13] In 2010, Holt et al. showed that only 50.7% of patients with non-valvular AF (NVAf) at high risk of stroke in the UK were treated with oral AC.[9] Opportunities to impact significantly on an important cause of cardiovascular morbidity and mortality are thereby frequently missed.

In 2012, a focused update of the 2010 European Society of Cardiology (ESC) guidelines for the management of AF was issued.[14] This update included three major changes based on new or strengthened evidence. Firstly, the CHA2DS2-VASc score replaced the CHADS2 score for the assessment of stroke risk. This is based on the accumulated evidence that CHA2DS2-VASc score, which is inclusive of the most common risk factors for stroke[15] and has been validated in multiple cohorts,[16] is better at identifying patients at “truly low risk” of AF-related stroke.[17-20] Secondly, the use of aspirin therapy for stroke prevention in AF was restricted to those patients who refuse oral anticoagulation. Thirdly, the use of non-vitamin K antagonist oral anticoagulants [(NOACs), such as dabigatran, apixaban, and rivaroxaban]) was recommended in preference to vitamin K antagonists (VKAs) in most patients with a CHA2DS2-VASc score  $\geq 1$ . [14]

1  
2  
3 Despite these guidelines and the weight of evidence, national audit data from the UK showed that  
4  
5 among patients with known AF admitted to hospital for stroke between January and March 2013,  
6  
7 38% were taking antiplatelet (AP) drugs alone.[21]  
8  
9

10 In 2014, when the National Institute for Health and Care Excellence (NICE) updated its AF clinical  
11  
12 guidelines (CG180),[22] it recommended that NOACs should be considered as equal first-line options  
13  
14 alongside warfarin for NVAF; furthermore in a significant change to established practice stated that  
15  
16 aspirin should not be used as monotherapy to prevent AF-related stroke. The Royal Colleges  
17  
18 published a Consensus Statement reiterating this advice and emphasising the importance of  
19  
20 ensuring patients are supported to make an informed choice of AC.[23]  
21  
22

23  
24 It is not yet known whether the update of the ESC and NICE guidelines effectively impacted  
25  
26 treatment practices in the UK. Therefore, this study aims to describe the changes in primary care  
27  
28 prescribing of oral AC and AP agents in patients with NVAF eligible for anticoagulation during the  
29  
30 years 2012–2016, and to identify clinical characteristics associated with deviation from guideline-  
31  
32 based recommendations.  
33  
34

## 35 **METHODS**

### 36 **Data Source**

37  
38 Data were obtained from the UK Clinical Practice Research Datalink (CPRD).[24] The CPRD is an  
39  
40 anonymised primary care database established in 1987 to collect longitudinal medical records data  
41  
42 from general practitioner (GP) practices. As of April 2013, the CPRD covered 674 GP practices with  
43  
44 4.4 million active patients (i.e., patients that are alive and registered), reflecting approximately 6.8%  
45  
46 of the UK population. This active sample is representative of the UK population in terms of age, sex,  
47  
48 and ethnicity. The CPRD contains patient registration information as well as events that the GP  
49  
50 records during routine clinical practice, including medical diagnoses, prescriptions issued,  
51  
52  
53  
54  
55  
56  
57  
58  
59  
60

1  
2  
3 anthropometric measurements, diagnostic tests, lifestyle information (e.g., smoking status, alcohol  
4 intake) and referrals to secondary care.  
5  
6

7  
8 The CPRD has broad National Research Ethics Service Committee (NRES) ethics approval for purely  
9 observational research. This study protocol was approved by the MHRA Independent Scientific  
10 Advisory Committee (protocol 14\_245R).  
11  
12  
13

### 14 **Study Population**

15  
16 All patients with a diagnosis of NVAf and eligible for anticoagulation according to ESC 2012[14] and  
17 NICE 2014[22] guidance at index date (CHA2DS2-VASc score  $\geq 2$ ) were included in five cross-sectional  
18 analyses: on 1<sup>st</sup> April of 2012, 2013, 2014, and 2015 and 1<sup>st</sup> January of 2016 (index date for each  
19 year). Patients were further required to be at least 18 years old at the index date, have had at least  
20 one consultation with their GP in the last 12 months, have ongoing CPRD registration, and have at  
21 least 12 months of computerised medical data prior to the index date. Patients were excluded from  
22 the study if they had a valvular condition (e.g., rheumatic mitral or aortic valve disease, or prosthetic  
23 valve; codes used to identify patients are in the data supplement), or if their gender was unknown.  
24  
25 Figure 1 summarises the patient selection process.  
26  
27  
28  
29  
30  
31  
32  
33  
34  
35  
36  
37

### 38 **Study Variables**

39  
40 Exposure to AC was defined by the last anticoagulation prescription identified in the 90-day period  
41 preceding the index date. Three type of regimens were defined: AC, AP alone, or no antithrombotic  
42 (AT) treatment. AC included vitamin K antagonists, apixaban, rivaroxaban, dabigatran, and  
43 parenteral AC. International normalised ratio (INR) measurements were treated as an indicator of  
44 VKA exposure and was therefore used to extend VKA exposure time. Exposure to AP alone was  
45 defined by an absence of AC prescription and the presence of at least one AP prescription in the 90-  
46 day period preceding the index date. No AT was defined by the absence of AC or AP prescription in  
47  
48  
49  
50  
51  
52  
53  
54  
55  
56  
57  
58  
59  
60



1  
2  
3 the 90-day period preceding the index data. A 90-day period has been used in previous studies to identify  
4 recent treatment exposure.[25]  
5  
6

7  
8 Demographic characteristics included age, gender, and country of residence. Clinical characteristics  
9  
10 were body mass index (BMI), smoking status, time since NVAf diagnosis, stroke risk factors (previous  
11 stroke, transient ischaemic attack [TIA] or other arterial thromboembolism, congestive heart failure  
12 (CHF), coronary artery disease, peripheral artery disease, hypertension, or diabetes mellitus), other  
13 bleeding risk factors (previous bleeds, peptic ulcer, renal disease, liver disease, concomitant  
14 treatment with antiplatelet or nonsteroidal anti-inflammatory drugs, or high alcohol intake), falls,  
15 active cancer (at least one diagnosis related to cancer in the last 12 months) and number of  
16 concomitant treatments (prescribed in the last 90 days). CHA<sub>2</sub>DS<sub>2</sub>-VASc score and a modified HAS-  
17 BLED score (excluding INR component as not consistently reported in CPRD, score range: 0-8) were  
18 calculated for all patients. All clinical diagnoses were identified using READ codes (codes lists  
19 provided in the data supplement). Diabetes and hypertension were also identified using the  
20 prescription of antidiabetic or antihypertensive treatments.  
21  
22  
23  
24  
25  
26  
27  
28  
29  
30  
31  
32

### 33 34 **Statistical Analyses**

35  
36  
37 The proportion of patients treated with each regimen (AC, AP alone, or no AT) and their 95%  
38 confidence interval were calculated at each index date. As the CPRD does not provide sample survey  
39 weights, it is only possible to estimate proportions as if the CPRD data is a simple random sample of  
40 approximately 8% of UK GPs/patients, so a finite population correction factor of 0.96 was applied to  
41 the standard errors of proportion estimates (FPFC =  $\sqrt{1-0.08}$  ~0.96).  
42  
43  
44  
45  
46  
47

48  
49 An interrupted time series analysis [26] was conducted to estimate the impact of the updated ESC  
50 guidance (published in August 2012) and NICE 2014 guidance (published in June 2014) on the  
51 evolution of the proportion of patients treated with each regimen, controlling for baseline level and  
52 trend. For this analysis, data from April 2011 to April 2015 were used and month-by-month  
53 estimates were extracted to obtain 50 time-points (using the same inclusion criteria than for the five  
54  
55  
56  
57  
58  
59  
60

1  
2  
3 main cross-sectional analyses). The time series model was divided into three time periods: (1) pre-  
4 ESC guidelines, (2) post-ESC guidelines, and (3) post-NICE guidelines. The statistical significance of  
5 the change in level (i.e., the rapid drop in rates immediately after the intervention) and trend (i.e.,  
6 the gradual decline in rates over the remainder of the follow-up period) were tested for each time  
7 period. The slope in each time period was calculated by summing the change in trend observed in  
8 the time period and the previous slope (in first period (pre-ESC), the baseline trend was equal to the  
9 slope).

10  
11  
12  
13  
14  
15  
16  
17  
18  
19 These analyses of the evolution of the anticoagulation management over time were also run  
20 separately in newly diagnosed patients with NVAf (<12 months) and in patients with NVAf with a  
21 diagnosis for  $\geq 12$  months, as well as in each country of residence separately (England, Scotland,  
22 Wales, and Northern Ireland; results by country provided in the data supplement).

23  
24  
25  
26  
27  
28 Generalised estimating equations (GEE) were used to identify demographic and clinical  
29 characteristics associated with antiplatelet treatment, and with the absence of AT treatment (versus  
30 receiving anticoagulation therapy) in April 2015 (date of the last planned cross-sectional analysis).  
31  
32  
33  
34  
35  
36  
37  
38  
39  
40  
41  
42  
43  
44  
45  
46  
47  
48  
49  
50  
51  
52  
53  
54  
55  
56  
57  
58  
59  
60  
The final models were obtained using a backward elimination until all variables were significantly  
associated with the outcome ( $P < 0.05$ ). Models were adjusted for clustering within individuals and  
within GP practices, and results are given as odds ratios and 95% confidence intervals.

### **Sensitivity Analyses**

To evaluate the proportion of patients that could have been misclassified as untreated, a sensitivity  
analysis was conducted, extending the exposure window used to classify patients to 180 days prior  
to index date. To assess the possible impact of GP sample modification, a second sensitivity analysis  
limiting the study sample to only those patients who were registered to a GP practice included in the  
CPRD throughout the study period.

]All analyses were conducted using SAS software version 9.4.

## RESULTS

### Patient Characteristics

The demographic and clinical characteristics of patients with NVAf eligible for anticoagulation according to ESC and NICE guidance (CHA<sub>2</sub>DS<sub>2</sub>-VASc  $\geq 2$ ) from April 2012 to January 2016 are provided in Table 1. The characteristics of the population were consistent across the study period: patients' mean age was 78 years, 52.4%–54.3% were male, and more than 50% were either overweight or obese. Almost 20% had a history of stroke or TIA, around 30% had a history of coronary artery disease and most had hypertension (>97%). Approximately 12% had been diagnosed with NVAf within the preceding 12 months (newly diagnosed).

### Treatment Patterns Over Time

The proportion of patients being treated with AC increased each year, showing an absolute rise of 16.7% over the study period (from 50.2% in April 2012 to 66.9% in January 2016) (Table 2). At the same time, the proportion of patients treated with an AP alone was reduced by half, showing an absolute decrease of 16.8% (from 34.2% in April 2012 to 17.4% January 2016). The proportion of patients not receiving any AT treatment remained the same across the study period, at around 15% of all patients with NVAf.

Stratifying the population by time since diagnosis identified the reduction in the proportion of patients treated with AP alone was greater in newly diagnosed patients, relative to those who had been diagnosed for  $\geq 12$  months (26.8% vs. 15.4%). In January 2016, only 11.3% of the newly diagnosed patients were treated with AP alone (vs 18.3% of those diagnosed  $\geq 12$  months). Similarly, the increase in the proportion of patients being prescribed AC was greater in those patients who were newly diagnosed compared to those diagnosed with NVAf for  $\geq 12$  months (25.3% vs. 15.5%). In January 2016, 72.5% of the newly diagnosed patients were treated with AC (vs. 66.1% of those diagnosed for  $\geq 12$  months).

1  
2  
3 In newly diagnosed patients, major changes in the type of oral AC prescribed were observed  
4  
5 between April 2014 and January 2016. The proportion of patients initiated with VKA fell from 50.8%  
6  
7 to 31.8% of all patients with NVAf, while the NOAC prescriptions rose from 9.8% to 40.6% (including  
8  
9 16.6% apixaban, 2.4% dabigatran, 21.5% rivaroxaban). No major change was observed in the NVAf  
10  
11 population with a diagnosis for  $\geq 12$  months; VKA prescribed in 50.9% of the population in January  
12  
13 2016 and NOACs in 15% (including 4.5% apixaban, 2.2% dabigatran, 8.3% rivaroxaban).

14  
15  
16  
17 A sensitivity analysis using a time period of 180 days prior to index date was used to evaluate the  
18  
19 proportion of patients that could have been misclassified as untreated. This analysis provided the  
20  
21 same results, with only 2% difference in the proportion of untreated patients observed. Results  
22  
23 were also unchanged when restricting only to those patients who were registered to a GP included  
24  
25 in the CPRD throughout the study period.  
26  
27

#### 28 **Impact of ESC and NICE Guidelines Publications on UK Practice**

29  
30  
31 The time series analysis stratified by time since NVAf diagnosis ( $< 12$  months or  $\geq 12$  months)  
32  
33 showed that there was a significant trend for increasing anticoagulation treatment in both patient  
34  
35 groups since April 2011 (Figure 3). However, a significant acceleration of this trend (increase of the  
36  
37 slope) was observed after the updated ESC guidance publication (change in trend:  $\beta=+0.26$  in newly  
38  
39 diagnosed,  $\beta=+0.18$  in patients diagnosed  $\geq 12$  months) and also after NICE guidance publication  
40  
41 (change in trend:  $\beta=+0.12$  in newly diagnosed,  $\beta=+0.15$  in patients diagnosed  $\geq 12$  months).  
42  
43  
44

45 Equally, a significant trend for decreasing antiplatelet use was observed since April 2011. A  
46  
47 significant acceleration of this trend was observed after both ESC and NICE guidance publications.  
48  
49 This change in trend was more marked after ESC for the newly diagnosed patients (post ESC:  $\beta=-$   
50  
51 0.26, post-NICE:  $\beta=-0.10$ ) and after NICE for patients diagnosed  $\geq 12$  months (post-ESC:  $\beta=-0.15$ ,  
52  
53 post-NICE:  $\beta=-0.21$ ).  
54  
55

#### 56 **Characteristics Associated with the Absence of Anticoagulation Therapy in April 2015**

1  
2  
3 Tables 3 and 4 present the results of the GEE models comparing demographic and clinical  
4 characteristics in patients receiving either an AP alone or no AT, versus those receiving AC treatment  
5 in April 2015. Even after adjusting on CHA2DS2-VASc score, females, patients aged <65 and ≥85 (vs.  
6 patients 65-74 years) were more likely to be prescribed an AP alone or no AT treatment, whereas  
7 patients with a history of stroke/TIA, CHF or hypertension were less likely to remain untreated. The  
8 likelihood of being treated with AP alone increased with time since diagnosis. Patients with coronary  
9 and peripheral artery disease were also more likely to be treated with an AP alone than AC.  
10 Importantly, CHA2DS2-VASc was associated with the absence of AT treatment, patients with a score  
11 ≥3 were less likely to remain untreated than patients with a CHA2DS2-VASc score=2. To less extent,  
12 the same association was observed in patients treated with AP alone (vs. AC). Patients who had a  
13 previous intracranial bleed were more likely to be treated with AP and even more likely to remain  
14 untreated. The absence of any AT was more frequent in patients with less than five  
15 comedications. Geographic variations were observed, with a higher proportion receiving AP alone or  
16 no AT in England and Scotland compared to Wales and Northern Ireland.  
17  
18  
19  
20  
21  
22  
23  
24  
25  
26  
27  
28  
29  
30  
31  
32

### 33 **DISCUSSION**

34  
35  
36  
37 A pronounced shift in anticoagulation management of patients with NVAf was observed in the UK  
38 between April 2012 and January 2016, coinciding with the update of ESC[14] and NICE[22] guidelines  
39 and with the availability of the NOACs as an alternative to VKAs. A substantial increase in the  
40 proportion of patients with NVAf at risk of stroke treated with AC was observed during this time  
41 (from 50.2% to 66.9%), as well as an important decrease of AP use (34.2% to 17.4%).  
42  
43  
44  
45  
46  
47

48 Whereas important increases in the proportion of patients with NVAf treated with AC were  
49 previously described in the UK between 1994-2003,[7, 8] no significant changes were observed in  
50 the years 2007–2010 in patients with CHA2DS2-VASc ≥2, with AC use remaining low (around 50%)  
51 and AP alone widely used (36%). The high use of AP until March 2012 may have also partly reflected  
52 the recommendations of the Quality and Outcomes Framework (QOF) of the NHS (National Health  
53  
54  
55  
56  
57  
58  
59  
60

1  
2  
3 Service), which provided equal emphasis on AC and AP in stroke prevention in primary care at that  
4  
5 time.[13]  
6  
7

8 The observed shift in treatment patterns in this study suggests a positive impact of both the ESC[14]  
9  
10 and NICE[22] guidelines in driving changes in thrombopropylaxis strategy for NVAF patients in the  
11  
12 UK, most notably the move away from AP use. The release of the ESC guidance appeared to impact  
13  
14 more significantly the management of recently diagnosed patients. This may reflect an earlier  
15  
16 change in the practice of cardiologists who, in the UK, are typically more involved in the diagnosis  
17  
18 and initial management of NVAF. Indeed, the publication of the NICE guidance had a greater impact  
19  
20 on the decline in AP use among patients with a pre-existing diagnosis, which might reflect the higher  
21  
22 impact of local guidance on GP's who are more involved in the long-term management of patients.  
23  
24

25  
26 Overall, the most marked improvement in stroke prevention in AF occurred in newly diagnosed  
27  
28 patients, in whom AC prescriptions rose from 47.2% to 72.5% and the use of AP alone dropped to  
29  
30 11.3% in January 2016. At the time of diagnosis, patients are likely to be particularly engaged with  
31  
32 their condition, more likely to be booked for further clinical assessment and physicians are obligated  
33  
34 to make a decision regarding AC. Conversely, patients with a longstanding diagnosis may be more  
35  
36 resistant to changes in their treatment regimen, and thromboembolism prophylaxis may not be the  
37  
38 focus of clinical appointments. As newly diagnosed patients represent only 20% of the NVAF  
39  
40 population, this emphasises the potential impact on stroke prevention in the UK that could be  
41  
42 achieved by effectively addressing thromboembolism prophylaxis strategy in patients with an  
43  
44 established NVAF diagnosis. Ongoing educational activity and the use of specialist nurses and  
45  
46 pharmacist led anticoagulation clinics will play an important role in reaching this group of patients.  
47  
48  
49

50 Importantly, the trend for increasing use of AC between 2012 and 2016 was associated with the  
51  
52 growing use of NOAC's (apixaban, rivaroxaban, dabigatran). This growth of NOAC use was mainly  
53  
54 observed in newly diagnosed patients between 2014 and 2016, associated with a decrease of VKA  
55  
56 initiation, and coincided with the release of NICE guidance[22] and the Consensus Statement  
57  
58  
59  
60

1  
2  
3 reiterating that NICE-approved treatments have to be made available for prescribing. This highlights  
4  
5 the vital role of the NOACs as alternatives to VKA through addressing some of the limitations of VKA  
6  
7 therapy and responding to individual patient needs. However, in patients who had been diagnosed  
8  
9 for  $\geq 12$  months, no major changes in the proportion treated with VKA were observed, indicating  
10  
11 significant VKA inertia in this group.  
12

13  
14 Although these data show that anticoagulation treatment patterns in NVAF have improved  
15  
16 substantially over the last five years, rates of anticoagulation appear to lag behind those observed in  
17  
18 contemporary European cohorts. For example, at the two-year follow up of the EORP-AF registry in  
19  
20 2015, 79.2% of AF patients were identified as receiving at least one oral AC (compared to 62.9% in  
21  
22 2015 in this study, Table 2).[27] Rates of NOAC use however appear more comparable, with 13.7% of  
23  
24 patients in EORP-AF receiving at least one NOAC (compared to 10.9% in this study in 2015). Baseline  
25  
26 data from the European population of the GLORIA-AF registry, which includes only newly diagnosed  
27  
28 AF patients, showed the majority (52.4%) were treated with NOACs, while 5.7 % received AP  
29  
30 therapy, and only 4.1% remained untreated.[28] These data are comparable to the 9.8% receiving  
31  
32 NOACs, 23.8% AP therapy, and 15.2% untreated among patients diagnosed between 2013 and 2014  
33  
34 in our study (Figure 2). Similarly, in the global GARFIELD-AF registry of patients with very recently  
35  
36 diagnosed NVAF (<6 weeks), over the period from 2010/11 to 2014/15 the proportion of patients  
37  
38 treated with AC increased from 57.4% to 71.1% including a significant increase in the proportion  
39  
40 receiving NOACs (4.2%–37.0%), whilst AP monotherapy declined from 30.2% to 16.6%.[29] It is  
41  
42 encouraging that our data up to January 2016 continue to show anticoagulation use is increasing in  
43  
44 the UK. Differences with European-based cohorts may, therefore, reflect a time lag associated with  
45  
46 the later release of NICE guidance in 2014[22] relative to the ESC guidance in 2012.[14] Other factors  
47  
48 may also be involved. The time lag between guideline recommendation and routine clinical practice  
49  
50 should be considered with the release of newer ESC guidance in 2016.[30]  
51  
52  
53  
54  
55  
56  
57  
58  
59  
60

1  
2  
3 Whereas the striking decrease of AP use observed in this study is encouraging, the absence of any  
4 changes in the proportion of patients remaining untreated raises some concerns. These current data  
5 identify patient characteristics associated with remaining untreated. Younger patients (<65 years),  
6 patients taking fewer prescription medications (<5), and those with a CHA2DS2-VASc score of 2 were  
7 all more likely to remain untreated. We hypothesise that this could be secondary to a misperception  
8 of stroke risk by clinicians but it may also be secondary to patient attitude. Furthermore for those  
9 patients <65 years of age, the monitoring requirements of VKAs may be regarded as incompatible  
10 with a working life; a barrier that could be overcome with the NOACs.

11  
12 At the other end of the spectrum, elderly patients (>85 years) were found to be less likely to be  
13 prescribed AC therapy and more likely to be treated with AP alone. This observation is well  
14 documented[8, 12, 13, 31-35] and may be secondary to an overestimation of bleeding risk despite  
15 unequivocal evidence of the benefits of AC in the elderly.[36-39]

16  
17 Our findings clearly illustrate the risk-treatment paradox previously reported in AF management [12]  
18 that patients at higher risk of stroke who more likely to benefit from AC therapy [38] are not  
19 receiving appropriate treatment, perhaps because of a perceived increased risk of bleeding. In fact,  
20 several bleeding risk factors such as falls, peptic ulcer disease, anaemia, and previous risk of  
21 intracranial or gastrointestinal bleeds were found to also be associated with an increasing likelihood  
22 of remaining untreated. A survey of UK general practices from 2000 to 2009 showed that this  
23 underuse of AC therapy in the elderly is not adequately explained by either an increase in  
24 comorbidities or bleeding risk.[40]

25  
26 In addition to age, female patients were found less likely to be treated with AC. This sex difference in  
27 prescribing has been previously observed in a UK study in AF.[8] Given that women with AF appear  
28 to lose their protection against sudden death including stroke,[41] and may even have a higher  
29 mortality than men,[42] these lower AC rates are a cause for concern. AP alone was found to be  
30 prescribed more frequently in patients with coronary artery disease. This may highlight the lack of a



1  
2  
3 definitive evidence base and clear guidance on the AT management of these patients, particularly in  
4  
5 the initial period following an acute coronary syndrome.  
6  
7

8 Collectively, the results indicate a strong mandate to change current clinical practice to improve  
9  
10 prescribing patterns among treating clinicians. This is further emphasised by the 2016 ESC  
11  
12 guidelines, which state that aspirin monotherapy should not be used for stroke prevention in AF  
13  
14 patients regardless of stroke risk, and may in fact cause harm [30] Although the present study was  
15  
16 conducted in the UK, the finding that a considerable number of AF patients continue to be  
17  
18 undertreated has wider implications for stroke prevention in AF, which remains a global issue.  
19  
20

### 21 **STRENGTHS AND LIMITATIONS**

22  
23  
24 This is a large study of a representative population of NVAf patients managed in the UK. It includes  
25  
26 patients with all forms of AF, including paroxysmal and chronic. The study may have not detected  
27  
28 some individuals receiving AC prescriptions in secondary care. The National Patient Safety Agency  
29  
30 has emphasised the importance of good communication between different bodies sharing  
31  
32 responsibility for prescribing potentially interacting medication, and this has increased the use of  
33  
34 codes in primary care to maintain awareness of AC therapy prescribed elsewhere.[9, 43].  
35  
36

37  
38 This study is based on a general practice database, and is limited by the accuracy of GP records.  
39  
40 Validation of the CPRD has shown high positive predictive value of some diagnoses and, where  
41  
42 evaluated, comparisons of incidence with other UK data sources are also broadly similar.[44]  
43  
44 However, the completeness of the record is more difficult to ascertain. We acknowledge that the  
45  
46 results reported in this study may under-represent comorbidities and, hence, overall stroke risk.  
47  
48

49  
50 It is important to note that due to the falling number of GP practices involved in the CPRD, the  
51  
52 number of eligible patients with NVAf also fell during the study period. However, a sensitivity  
53  
54 analysis was conducted on the NVAf population who were registered to a GP practice included in  
55  
56  
57  
58  
59  
60

1  
2  
3 the CPRD throughout the study period, and the results were unchanged. Therefore, the observed  
4  
5 change in AT management cannot be attributed to the reduction in available GP data.  
6  
7

8 It is important to reflect on the differences in the nature of data collection and analysis between  
9  
10 registry and real world healthcare records, whereby participation in a registry may influence  
11  
12 treatment selection but allow more complete and accurate data collection, whereas real world  
13  
14 datasets allow analysis of much larger cohorts that are more likely to reflect wider contemporary  
15  
16 practice, albeit with less complete and well-validated data.  
17  
18

### 19 **CONCLUSION**

20  
21 Major improvements in the AC management of patients with NVAF for stroke prevention in the UK  
22  
23 were observed between April 2012 and January 2016. Despite this, 20% of the at-risk population  
24  
25 were still treated with AP alone and more than 15% of patients were on no AT agents in January  
26  
27 2016. However, if the trend of rapid reduction of AP use observed during the study period continues,  
28  
29 then the use of AP alone for stroke prevention could essentially disappear in the next few years in  
30  
31 the UK. The consistency observed over time in the proportion of patients not treated with any AT  
32  
33 therapy represents the area of greatest concern. The clinical inertia seen in this group may be due to  
34  
35 an underestimate of the risk of stroke in these patients, who were found to be younger with less  
36  
37 comorbidities and the overestimation of bleeding risk in the elderly (>85 years). There remains a  
38  
39 huge potential for reducing the stroke risk of the AF population by improving the thromboembolic  
40  
41 risk assessment in NVAF in primary care and the identification of patients requiring anticoagulation.  
42  
43  
44  
45  
46  
47  
48  
49  
50  
51  
52  
53  
54  
55  
56  
57  
58  
59  
60

**AUTHORSHIP DETAILS**

L. Lacoïn, C. Lefevre, D. Evans and J. Halcox conceived and designed the study. L. McDonald, M. Pereira and S. Ramagopalan undertook the analysis. All authors contributed to the analysis and interpretation of the data. L. McDonald wrote the first draft and all authors contributed to subsequent drafts and the final paper.

**ACKNOWLEDGMENTS**

The authors would like to gratefully acknowledge the contribution of Sharon McLachlan, Robert Donaldson and Jack Ishakwho all provided expert opinion during the data analysis.

Highly Confidential  
For peer review only

## REFERENCES

1. Go AS, Hylek EM, Phillips KA, Chang Y, Henault LE, Selby JV, Singer DE. Prevalence of diagnosed atrial fibrillation in adults: national implications for rhythm management and stroke prevention: the AnTicoagulation and Risk Factors in Atrial Fibrillation (ATRIA) Study. *JAMA* 2001; 285: 2370-2375.
2. Chugh SS, Havmoeller R, Narayanan K, Singh D, Rienstra M, Benjamin EJ, Gillum RF, Kim YH, McAnulty JH, Jr., Zheng ZJ, Forouzanfar MH, Naghavi M, Mensah GA, Ezzati M, Murray CJ. Worldwide epidemiology of atrial fibrillation: a Global Burden of Disease 2010 Study. *Circulation* 2014; 129: 837-847.
3. Public Health England. Atrial fibrillation prevalence estimates in England: application of recent population estimates of AF in Sweden 2015 [December 2015]. Available from: <http://www.yhpho.org.uk//resource/view.aspx?RID=207902>
4. Kirchhof P, Auricchio A, Bax J, Crijns H, Camm J, Diener HC, Goette A, Hindricks G, Hohnloser S, Kappenberger L, Kuck KH, Lip GY, Olsson B, Meinertz T, Priori S, Ravens U, Steinbeck G, Svernhage E, Tijssen J, Vincent A, et al. Outcome parameters for trials in atrial fibrillation: executive summary. *Eur Heart J* 2007; 28: 2803-2817.
5. Royal College of Physicians. Sentinel Stroke National Audit Programme (SSNAP). Clinical audit April - June 2015 report prepared by Royal College of Physicians, Clinical Effectiveness and Evaluation Unit on behalf of the Intercollegiate Stroke Working Party. 2015.
6. Lin HJ, Wolf PA, Kelly-Hayes M, Beiser AS, Kase CS, Benjamin EJ, D'Agostino RB. Stroke severity in atrial fibrillation. The Framingham Study. *Stroke* 1996; 27: 1760-1764.
7. Majeed A, Moser K, Carroll K. Trends in the prevalence and management of atrial fibrillation in general practice in England and Wales, 1994-1998: analysis of data from the general practice research database. *Heart* 2001; 86: 284-288.

- 1  
2  
3 8. DeWilde S, Carey IM, Emmas C, Richards N, Cook DG. Trends in the prevalence of diagnosed  
4 atrial fibrillation, its treatment with anticoagulation and predictors of such treatment in UK  
5 primary care. *Heart* 2006; 92: 1064-1070.  
6  
7
- 8  
9  
10 9. Holt TA, Hunter TD, Gunnarsson C, Khan N, Cload P, Lip GY. Risk of stroke and oral  
11 anticoagulant use in atrial fibrillation: a cross-sectional survey. *Br J Gen Pract* 2012; 62: e710-  
12 717.  
13
- 14  
15  
16 10. Ogilvie IM, Newton N, Welner SA, Cowell W, Lip GY. Underuse of oral anticoagulants in atrial  
17 fibrillation: a systematic review. *Am J Med* 2010; 123: 638-645 e634.  
18
- 19  
20  
21 11. Nieuwlaat R, Capucci A, Lip GY, Olsson SB, Prins MH, Nieman FH, Lopez-Sendon J, Vardas PE,  
22 Aliot E, Santini M, Crijns HJ, Euro Heart Survey I. Antithrombotic treatment in real-life atrial  
23 fibrillation patients: a report from the Euro Heart Survey on Atrial Fibrillation. *Eur Heart J*  
24 2006; 27: 3018-3026.  
25  
26
- 27  
28  
29 12. Sandhu RK, Bakal JA, Ezekowitz JA, McAlister FA. Risk stratification schemes, anticoagulation  
30 use and outcomes: the risk--treatment paradox in patients with newly diagnosed non-valvular  
31 atrial fibrillation. *Heart* 2011; 97: 2046-2050.  
32  
33
- 34  
35  
36 13. Cowan C, Healicon R, Robson I, Long WR, Barrett J, Fay M, Tyndall K, Gale CP. The use of  
37 anticoagulants in the management of atrial fibrillation among general practices in England.  
38 *Heart* 2013; 99: 1166-1172.  
39  
40
- 41  
42  
43 14. Camm AJ, Lip GY, De Caterina R, Savelieva I, Atar D, Hohnloser SH, Hindricks G, Kirchhof P, ESC  
44 Committee for Practice Guidelines-CPG. 2012 focused update of the ESC Guidelines for the  
45 management of atrial fibrillation: an update of the 2010 ESC Guidelines for the management  
46 of atrial fibrillation--developed with the special contribution of the European Heart Rhythm  
47 Association. *Europace* 2012; 14: 1385-1413.  
48  
49  
50  
51  
52  
53  
54  
55  
56  
57  
58  
59  
60

- 1  
2  
3 15. Lip GY, Nieuwlaat R, Pisters R, Lane DA, Crijns HJ. Refining clinical risk stratification for  
4 predicting stroke and thromboembolism in atrial fibrillation using a novel risk factor-based  
5 approach: the euro heart survey on atrial fibrillation. *Chest* 2010; 137: 263-272.  
6  
7  
8
- 9  
10 16. Lip GY. Stroke in atrial fibrillation: epidemiology and thromboprophylaxis. *J Thromb Haemost*  
11 2011; 9 Suppl 1: 344-351.  
12  
13
- 14 17. Potpara TS, Polovina MM, Licina MM, Marinkovic JM, Prostran MS, Lip GY. Reliable  
15 identification of "truly low" thromboembolic risk in patients initially diagnosed with "lone"  
16 atrial fibrillation: the Belgrade atrial fibrillation study. *Circ Arrhythm Electrophysiol* 2012; 5:  
17 319-326.  
18  
19  
20  
21  
22
- 23 18. Olesen JB, Torp-Pedersen C, Hansen ML, Lip GY. The value of the CHA2DS2-VASc score for  
24 refining stroke risk stratification in patients with atrial fibrillation with a CHADS2 score 0-1: a  
25 nationwide cohort study. *Thromb Haemost* 2012; 107: 1172-1179.  
26  
27  
28  
29
- 30 19. Van Staa TP, Setakis E, Di Tanna GL, Lane DA, Lip GY. A comparison of risk stratification  
31 schemes for stroke in 79,884 atrial fibrillation patients in general practice. *J Thromb Haemost*  
32 2011; 9: 39-48.  
33  
34  
35
- 36 20. Abu-Assi E, Otero-Ravina F, Allut Vidal G, Coutado Mendez A, Vaamonde Mosquera L, Sanchez  
37 Loureiro M, Caneda Villar MC, Fernandez Villaverde JM, Maestro Saavedra FJ, Gonzalez-  
38 Juanatey JR, Grupo Barbanza researchers. Comparison of the reliability and validity of four  
39 contemporary risk stratification schemes to predict thromboembolism in non-anticoagulated  
40 patients with atrial fibrillation. *Int J Cardiol* 2013; 166: 205-209.  
41  
42  
43  
44  
45  
46
- 47 21. Royal College of Physicians. Sentinel Stroke National Audit Programme (SSNAP). Clinical audit  
48 first pilot public report; August 2013.  
49  
50  
51
- 52 22. National Clinical Guideline Centre. Atrial fibrillation: the management of atrial fibrillation.  
53 Clinical guideline: methods, evidence and recommendations [NICE CG180]. 2014.  
54  
55  
56  
57  
58  
59  
60

- 1  
2  
3 23. NICE Implementation Collaborative. Consensus supporting local implementation of NICE  
4 guidance on use of the novel (non-Vitamin K antagonist) oral anticoagulants in non-valvular  
5 atrial fibrillation. 2014.  
6  
7  
8  
9  
10 24. Herrett E, Gallagher AM, Bhaskaran K, Forbes H, Mathur R, van Staa T, Smeeth L. Data  
11 Resource Profile: Clinical Practice Research Datalink (CPRD). *Int J Epidemiol* 2015; 44: 827-836.  
12  
13  
14 25. Gallagher AM, van Staa TP, Murray-Thomas T, Schoof N, Clemens A, Ackermann D, Bartels DB.  
15 Population-based cohort study of warfarin-treated patients with atrial fibrillation: incidence of  
16 cardiovascular and bleeding outcomes. *BMJ Open* 2014; 4: e003839.  
17  
18  
19  
20  
21 26. Penfold RB, Zhang F. Use of interrupted time series analysis in evaluating health care quality  
22 improvements. *Acad Pediatr* 2013; 13: S38-44.  
23  
24  
25  
26 27. Bassand JP, Accetta G, Camm AJ, Cools F, Fitzmaurice DA, Fox KA, Goldhaber SZ, Goto S, Haas  
27 S, Hacke W, Kayani G, Mantovani LG, Misselwitz F, Ten Cate H, Turpie AG, Verheugt FW,  
28 Kakkar AK, Garfield-Af Investigators. Two-year outcomes of patients with newly diagnosed  
29 atrial fibrillation: results from GARFIELD-AF. *Eur Heart J* 2016.  
30  
31  
32  
33  
34 28. Huisman MV, Rothman KJ, Paquette M, Teutsch C, Diener HC, Dubner SJ, Halperin JL, Ma C,  
35 Zint K, Elsaesser A, Bartels DB, Lip GY, Gloria-Af Investigators. Antithrombotic Treatment  
36 Patterns in Patients with Newly Diagnosed Nonvalvular Atrial Fibrillation: The GLORIA-AF  
37 Registry, Phase II. *Am J Med* 2015; 128: 1306-1313 e1301.  
38  
39  
40  
41  
42  
43 29. Camm AJ, Accetta G, Ambrosio G, Atar D, Bassand JP, Berge E, Cools F, Fitzmaurice DA,  
44 Goldhaber SZ, Goto S, Haas S, Kayani G, Koretsune Y, Mantovani LG, Misselwitz F, Oh S, Turpie  
45 AG, Verheugt FW, Kakkar AK, Garfield-Af Investigators. Evolving antithrombotic treatment  
46 patterns for patients with newly diagnosed atrial fibrillation. *Heart* 2016.  
47  
48  
49  
50  
51  
52 30. Kirchhof P, Benussi S, Kotecha D, Ahlsson A, Atar D, Casadei B, Castella M, Diener HC,  
53 Heidbuchel H, Hendriks J, Hindricks G, Manolis AS, Oldgren J, Popescu BA, Schotten U, Van  
54 Putte B, Vardas P, Agewall S, Camm J, Baron Esquivias G, et al. 2016 ESC Guidelines for the  
55  
56  
57  
58  
59  
60

- 1  
2  
3 management of atrial fibrillation developed in collaboration with EACTS. *Eur Heart J* 2016; 37:  
4  
5 2893-2962.  
6  
7  
8 31. Friberg L, Hammar N, Ringh M, Pettersson H, Rosenqvist M. Stroke prophylaxis in atrial  
9  
10 fibrillation: who gets it and who does not? Report from the Stockholm Cohort-study on Atrial  
11  
12 Fibrillation (SCAF-study). *Eur Heart J* 2006; 27: 1954-1964.  
13  
14 32. Waldo AL, Becker RC, Tapson VF, Colgan KJ, Committee NS. Hospitalized patients with atrial  
15  
16 fibrillation and a high risk of stroke are not being provided with adequate anticoagulation. *J*  
17  
18 *Am Coll Cardiol* 2005; 46: 1729-1736.  
19  
20  
21 33. Gallagher AM, Rietbrock S, Plumb J, van Staa TP. Initiation and persistence of warfarin or  
22  
23 aspirin in patients with chronic atrial fibrillation in general practice: do the appropriate  
24  
25 patients receive stroke prophylaxis? *J Thromb Haemost* 2008; 6: 1500-1506.  
26  
27  
28 34. Falstaff Study Group, Leizorovicz A, Cohen A, Guenoun M, Mismetti P, Weisslinger N. Influence  
29  
30 of age on the prescription of vitamin K antagonists in outpatients with permanent atrial  
31  
32 fibrillation in France. *Pharmacoepidemiol Drug Saf* 2007; 16: 32-38.  
33  
34  
35 35. Simpson CR, Wilson C, Hannaford PC, Williams D. Evidence for age and sex differences in the  
36  
37 secondary prevention of stroke in Scottish primary care. *Stroke* 2005; 36: 1771-1775.  
38  
39  
40 36. Mant J, Hobbs FD, Fletcher K, Roalfe A, Fitzmaurice D, Lip GY, Murray E, Bafta investigators,  
41  
42 Midland Research Practices Network. Warfarin versus aspirin for stroke prevention in an  
43  
44 elderly community population with atrial fibrillation (the Birmingham Atrial Fibrillation  
45  
46 Treatment of the Aged Study, BAFTA): a randomised controlled trial. *Lancet* 2007; 370: 493-  
47  
48 503.  
49  
50 37. Rash A, Downes T, Portner R, Yeo WW, Morgan N, Channer KS. A randomised controlled trial  
51  
52 of warfarin versus aspirin for stroke prevention in octogenarians with atrial fibrillation  
53  
54 (WASPO). *Age Ageing* 2007; 36: 151-156.  
55  
56  
57  
58  
59  
60



- 1  
2  
3 38. van Walraven C, Hart RG, Connolly S, Austin PC, Mant J, Hobbs FD, Koudstaal PJ, Petersen P,  
4  
5 Perez-Gomez F, Knottnerus JA, Boode B, Ezekowitz MD, Singer DE. Effect of age on stroke  
6  
7 prevention therapy in patients with atrial fibrillation: the atrial fibrillation investigators. *Stroke*  
8  
9 2009; 40: 1410-1416.  
10  
11  
12 39. Garwood CL, Corbett TL. Use of anticoagulation in elderly patients with atrial fibrillation who  
13  
14 are at risk for falls. *Ann Pharmacother* 2008; 42: 523-532.  
15  
16  
17 40. Scowcroft AC, Lee S, Mant J. Thromboprophylaxis of elderly patients with AF in the UK: an  
18  
19 analysis using the General Practice Research Database (GPRD) 2000-2009. *Heart* 2013; 99:  
20  
21 127-132.  
22  
23  
24 41. Benjamin EJ, Wolf PA, D'Agostino RB, Silbershatz H, Kannel WB, Levy D. Impact of atrial  
25  
26 fibrillation on the risk of death: the Framingham Heart Study. *Circulation* 1998; 98: 946-952.  
27  
28  
29 42. Stewart S, Hart CL, Hole DJ, McMurray JJ. A population-based study of the long-term risks  
30  
31 associated with atrial fibrillation: 20-year follow-up of the Renfrew/Paisley study. *Am J Med*  
32  
33 2002; 113: 359-364.  
34  
35  
36 43. Baglin TP, Cousins D, Keeling DM, Perry DJ, Watson HG. Safety indicators for inpatient and  
37  
38 outpatient oral anticoagulant care: [corrected] Recommendations from the British Committee  
39  
40 for Standards in Haematology and National Patient Safety Agency. *Br J Haematol* 2007; 136:  
41  
42 26-29.  
43  
44 44. Herrett E, Thomas SL, Schoonen WM, Smeeth L, Hall AJ. Validation and validity of diagnoses in  
45  
46 the General Practice Research Database: a systematic review. *Br J Clin Pharmacol* 2010; 69: 4-  
47  
48 14.  
49  
50  
51  
52  
53  
54  
55  
56  
57  
58  
59  
60

1  
2  
3 **FIGURE LEGENDS**  
4

5  
6 **Figure 1. Flowchart describing the sample used in each year**  
7

8  
9 **Figure 2. Evolution of the proportion of patients treated with each anticoagulant, with antiplatelet**  
10 **therapy alone or no antithrombotic therapy among patients with NVAF with CHA2DS2-VASc  $\geq 2$**   
11 **separately in newly diagnosed patients (A) and patients diagnosed since 12 months or more (B)**  
12  
13

14  
15  
16 A) Newly diagnosed patients with NVAF  
17

18  
19 B) Patients with NVAF diagnosis since 12 months or more  
20

21  
22 **Figure 3. Time series analysis describing the trends in the evolution of the proportion of patients**  
23 **with NVAF treated with anticoagulants, aspirin, or other antiplatelet therapy alone or without any**  
24 **antithrombotic treatment from April 2012 to April 2015 in the UK, by time since NVAF diagnosis**  
25  
26  
27

28  
29 A. Anticoagulation treatment  
30

31  
32

|                                              | Pre-ESC <sup>1</sup> |      |         | Post-ESC <sup>2</sup> |      |         | Post-NICE <sup>2</sup> |      |         |
|----------------------------------------------|----------------------|------|---------|-----------------------|------|---------|------------------------|------|---------|
|                                              | $\beta$              | SE   | p-value | $\beta$               | SE   | p-value | $\beta$                | SE   | p-value |
| <b>Diagnosed &lt; 12 months</b>              |                      |      |         |                       |      |         |                        |      |         |
| <b>Level</b>                                 | 43.09                | 0.26 | <.0001  | 0.28                  | 0.35 | 0.418   | 0.10                   | 0.49 | 0.846   |
| <b>Trend</b>                                 | 0.34                 | 0.02 | <.0001  | 0.26                  | 0.03 | <.0001  | 0.12                   | 0.09 | 0.171   |
| <b>Diagnosed <math>\geq 12</math> months</b> |                      |      |         |                       |      |         |                        |      |         |
| <b>Level</b>                                 | 49.01                | 0.07 | <.0001  | 0.00                  | 0.10 | 0.981   | -0.16                  | 0.14 | 0.251   |
| <b>Trend</b>                                 | 0.13                 | 0.01 | <.0001  | 0.18                  | 0.01 | <.0001  | 0.15                   | 0.02 | <.0001  |

33  
34  
35  
36  
37  
38  
39  
40  
41  
42  
43  
44  
45  
46  
47

48 <sup>1</sup>For Pre-ESC data are base level, base trend. <sup>2</sup>Post-ESC and Post-NICE data are change in level, change in trend  
49  
50  
51  
52  
53  
54  
55  
56  
57  
58  
59  
60

## B. Aspirin (ASA) or other AP only

|                                             | Pre-ESC <sup>1</sup> |      |         | Post-ESC <sup>2</sup> |      |         | Post-NICE <sup>2</sup> |      |         |
|---------------------------------------------|----------------------|------|---------|-----------------------|------|---------|------------------------|------|---------|
|                                             | $\beta$              | SE   | p-value | $\beta$               | SE   | p-value | $\beta$                | SE   | p-value |
| <b>Diagnosed &lt;12months</b>               |                      |      |         |                       |      |         |                        |      |         |
| <b>Level</b>                                | 41.94                | 0.24 | <.0001  | -0.20                 | 0.31 | 0.518   | -0.63                  | 0.44 | 0.159   |
| <b>Trend</b>                                | -0.36                | 0.02 | <.0001  | -0.26                 | 0.03 | <.0001  | -0.10                  | 0.08 | 0.226   |
| <b>Diagnosed <math>\geq</math>12 months</b> |                      |      |         |                       |      |         |                        |      |         |
| <b>Level</b>                                | 35.05                | 0.06 | <.0001  | 0.03                  | 0.08 | 0.737   | -0.33                  | 0.12 | 0.008   |
| <b>Trend</b>                                | -0.12                | 0.01 | <.0001  | -0.15                 | 0.01 | <.0001  | -0.21                  | 0.02 | <.0001  |

<sup>1</sup>For Pre-ESC data are base level, base trend. <sup>2</sup>Post-ESC and Post-NICE data are change in level, change in trend

## C. Without any antithrombotic treatment

|                                             | Pre-ESC <sup>1</sup> |      |         | Post-ESC <sup>2</sup> |      |         | Post-NICE <sup>2</sup> |      |         |
|---------------------------------------------|----------------------|------|---------|-----------------------|------|---------|------------------------|------|---------|
|                                             | $\beta$              | SE   | p-value | $\beta$               | SE   | p-value | $\beta$                | SE   | p-value |
| <b>Diagnosed &lt;12months</b>               |                      |      |         |                       |      |         |                        |      |         |
| <b>Level</b>                                | 14.97                | 0.15 | <.0001  | -0.08                 | 0.19 | 0.6835  | 0.54                   | 0.27 | 0.057   |
| <b>Trend</b>                                | 0.02                 | 0.01 | 0.211   | 0.00                  | 0.02 | 0.9262  | -0.03                  | 0.05 | 0.612   |
| <b>Diagnosed <math>\geq</math>12 months</b> |                      |      |         |                       |      |         |                        |      |         |
| <b>Level</b>                                | 15.94                | 0.07 | <.0001  | -0.03                 | 0.10 | 0.789   | 0.49                   | 0.14 | 0.001   |
| <b>Trend</b>                                | -0.01                | 0.01 | 0.174   | -0.03                 | 0.01 | 0.000   | 0.06                   | 0.02 | 0.015   |

<sup>1</sup>For Pre-ESC data are base level, base trend. <sup>2</sup>Post-ESC and Post-NICE data are change in level, change in trend

**Table 1. Demographic and clinical characteristics of patients with NVAf on each index date (data given as n, % unless stated otherwise)**

|                                           | April 2012       |      | April 2013       |      | April 2014       |      | April 2015       |      | Jan 2016         |      |
|-------------------------------------------|------------------|------|------------------|------|------------------|------|------------------|------|------------------|------|
|                                           | (n=67327)        |      | (n=66364)        |      | (n=62840)        |      | (n=53150)        |      | (n=45105)        |      |
|                                           | n                | %    | n                | %    | n                | %    | n                | %    | n                | %    |
| <b>Age (years) mean (SD)</b>              | 78 (10)          |      | 78 (10)          |      | 78 (10)          |      | 78 (9.9)         |      | 78 (9.9)         |      |
| <b>Gender: Male</b>                       | 35277            | 52.4 | 35096            | 52.9 | 33477            | 53.3 | 28756            | 54.1 | 24495            | 54.3 |
| <b>Country</b>                            |                  |      |                  |      |                  |      |                  |      |                  |      |
| England                                   | 51055            | 75.8 | 49721            | 74.9 | 45422            | 72.3 | 36910            | 69.4 | 28226            | 62.6 |
| Wales                                     | 7193             | 10.7 | 7168             | 10.8 | 7658             | 12.2 | 6791             | 12.8 | 7088             | 15.7 |
| Scotland                                  | 6826             | 10.1 | 7132             | 10.7 | 7331             | 11.7 | 6850             | 12.9 | 7060             | 15.7 |
| Northern Ireland                          | 2253             | 3.3  | 2343             | 3.5  | 2429             | 3.9  | 2599             | 4.9  | 2731             | 6.1  |
| <b>Smoking status</b>                     |                  |      |                  |      |                  |      |                  |      |                  |      |
| Current smoker                            | 4685             | 7.0  | 4500             | 6.8  | 4087             | 6.5  | 3305             | 6.2  | 2877             | 6.4  |
| Past smoker                               | 34297            | 50.9 | 34019            | 51.3 | 32258            | 51.3 | 27389            | 51.5 | 23119            | 51.3 |
| <b>Body mass index (kg/m<sup>2</sup>)</b> |                  |      |                  |      |                  |      |                  |      |                  |      |
| Missing data                              | 5283             | 7.8  | 4588             | 6.9  | 3990             | 6.3  | 3209             | 6.0  | 2667             | 5.9  |
| Median (Q1-Q3)                            | 27.2 (24.1-31.1) |      | 27.2 (24.1-31.2) |      | 27.3 (24.2-31.2) |      | 27.4 (24.3-31.4) |      | 27.6 (24.3-31.5) |      |
| <b>GP consultation in the last</b>        |                  |      |                  |      |                  |      |                  |      |                  |      |
| year Median (Q1-Q3)                       | 13 (8-22)        |      | 13 (8-22)        |      | 14 (8-23)        |      | 14 (8-23)        |      | 14 (8-22)        |      |
| <b>Newly diagnosed NVAf</b>               | 8197             | 12.2 | 8104             | 12.2 | 7421             | 11.8 | 6255             | 11.8 | 5564             | 12.3 |
| <b>Stroke risk factors</b>                |                  |      |                  |      |                  |      |                  |      |                  |      |
| Previous stroke/TIA                       | 13136            | 19.5 | 12966            | 19.5 | 12312            | 19.6 | 10393            | 19.6 | 8986             | 19.9 |
| Other arterial thromboembolism            | 281              | 0.4  | 267              | 0.4  | 243              | 0.4  | 207              | 0.4  | 182              | 0.4  |
| Congestive heart failure                  | 11970            | 17.8 | 11536            | 17.4 | 10780            | 17.2 | 9296             | 17.5 | 8272             | 18.3 |
| Coronary artery disease                   | 21158            | 31.4 | 20213            | 30.5 | 18691            | 29.7 | 15383            | 28.9 | 12892            | 28.6 |
| Peripheral arterial disease               | 4136             | 6.1  | 3978             | 6    | 3671             | 5.8  | 2958             | 5.6  | 2491             | 5.5  |
| Hypertension                              | 65349            | 97.1 | 64557            | 97.3 | 61255            | 97.5 | 51872            | 97.6 | 44039            | 97.6 |
| Diabetes mellitus                         | 13949            | 20.7 | 13974            | 21.1 | 13564            | 21.6 | 11779            | 22.2 | 10222            | 22.7 |

|                                         | April 2012 |        | April 2013 |        | April 2014 |        | April 2015 |        | Jan 2016  |        |
|-----------------------------------------|------------|--------|------------|--------|------------|--------|------------|--------|-----------|--------|
|                                         | (n=67327)  |        | (n=66364)  |        | (n=62840)  |        | (n=53150)  |        | (n=45105) |        |
|                                         | n          | %      | n          | %      | n          | %      | n          | %      | n         | %      |
| <b>CHA2DS2-VASc score</b>               |            |        |            |        |            |        |            |        |           |        |
| Median (Q1-Q3)                          | 4          | (3-5)  | 4          | (3-5)  | 4          | (3-5)  | 4          | (3-5)  | 4         | (3-5)  |
| <b>Modified HAS-BLED score*</b>         |            |        |            |        |            |        |            |        |           |        |
| Median (Q1-Q3)                          | 4          | (3-4)  | 4          | (3-4)  | 4          | (3-4)  | 4          | (3-4)  | 4         | (3-4)  |
| <b>Previous bleedings**</b>             | 22136      | 32.9   | 22260      | 33.5   | 21770      | 34.6   | 18669      | 35.1   | 15889     | 35.2   |
| Intracranial                            | 1166       | 1.7    | 1223       | 1.8    | 1238       | 2.0    | 1039       | 2.0    | 897       | 2.0    |
| Gastrointestinal                        | 7755       | 11.5   | 7700       | 11.6   | 7575       | 12.1   | 6536       | 12.3   | 5677      | 12.6   |
| <b>Renal disease***</b>                 | 23367      | 34.7   | 23003      | 34.7   | 21391      | 34     | 17796      | 33.5   | 15061     | 33.4   |
| <b>Liver disease</b>                    | 454        | 0.7    | 478        | 0.7    | 475        | 0.8    | 425        | 0.8    | 393       | 0.9    |
| <b>Number of concomitant treatments</b> |            |        |            |        |            |        |            |        |           |        |
| Median (Q1-Q3)                          | 8          | (5-11) | 8          | (5-11) | 8          | (5-11) | 8          | (5-11) | 7         | (5-11) |

Abbreviations: GP, general practitioner; NVAf, non-valvular atrial fibrillation; SD, standard deviation; TIA, transient ischaemic attack

\* Excluding INR component as not consistently reported in CPRD, score range: 0–8.

\*\* Including intracranial, gastrointestinal, intraocular, pericardial, urinary, intra-articular, lung, or other bleed. Gynecological bleeds excluded.

\*\*\* Including any renal disease, chronic kidney disease stage 1-5

**Table 2. Evolution of the proportion of patients treated with anticoagulants, with antiplatelet therapy alone or no antithrombotic therapy among patients with NVAf with CHA2DS2-VASc  $\geq$  2**

|                            | April 2012              | April 2013              | April 2014              | April 2015              | January 2016            |
|----------------------------|-------------------------|-------------------------|-------------------------|-------------------------|-------------------------|
|                            | % (95% CI)              |
| Anticoagulation            | <b>50.2</b> (49.8-50.5) | <b>53.2</b> (52.8-53.5) | <b>57.5</b> (57.1-57.9) | <b>62.9</b> (62.5-63.3) | <b>66.9</b> (66.5-67.3) |
| Antiplatelet therapy alone | <b>34.2</b> (33.9-34.5) | <b>31.2</b> (30.8-31.5) | <b>27.7</b> (27.3-28.0) | <b>21.8</b> (21.5-22.2) | <b>17.4</b> (17.1-17.8) |
| No antithrombotic therapy  | <b>15.6</b> (15.4-15.9) | <b>15.7</b> (15.4-15.9) | <b>14.8</b> (14.6-15.1) | <b>15.3</b> (15.0-15.6) | <b>15.7</b> (15.4-16.0) |

Abbreviations: CI, confidence interval

For peer review only - Highly Confidential

**Table 3. Factors associated with the prescription of aspirin or other antiplatelet for TE prevention in NVAF in April 2015 (vs. anticoagulation): results of the GEE model**

|                                          | Antiplatelet therapy |      | Treated with  |      | OR (95% CI)       | P-value |
|------------------------------------------|----------------------|------|---------------|------|-------------------|---------|
|                                          | alone                |      | anticoagulant |      |                   |         |
|                                          | N=11,609             |      | N= 33,413     |      |                   |         |
|                                          | n                    | %    | N             | %    |                   |         |
| <b>Patient age (years)</b>               |                      |      |               |      |                   | < .0001 |
| < 65                                     | 890                  | 7.7  | 2016          | 6.0  | 1.22 (1.10-1.35)  |         |
| 65 to 74                                 | 2769                 | 23.9 | 8780          | 26.3 | Reference         |         |
| 75 to 84                                 | 3842                 | 33.1 | 14363         | 43.0 | 0.94 (0.87-1.02)  |         |
| ≥ 85                                     | 4108                 | 35.4 | 8254          | 24.7 | 1.72 (1.58-1.87)  |         |
| <b>Country</b>                           |                      |      |               |      |                   | 0.001   |
| England                                  | 8065                 | 69.5 | 22909         | 68.6 | Reference.        |         |
| Wales                                    | 1383                 | 11.9 | 4524          | 13.5 | 0.80 (0.70-0.91)  |         |
| Scotland                                 | 1590                 | 13.7 | 4231          | 12.7 | 1.06 (0.96-1.19)  |         |
| N. Ireland                               | 571                  | 4.9  | 1749          | 5.2  | 0.83 (0.72-0.97)  |         |
| <b>Gender: male (reference = female)</b> | 5364                 | 46.2 | 14580         | 43.6 | 0.87 (0.81-0.93)  | <.0001  |
| <b>Time since NVAF diagnosis</b>         |                      |      |               |      |                   | <.0001  |
| < 6 months                               | 497                  | 4.3  | 2121          | 6.3  | Reference         |         |
| 6 to 12 months                           | 442                  | 3.8  | 2175          | 6.5  | 0.96 (0.83-1.11)  |         |
| 12 to 24 months                          | 979                  | 8.4  | 3886          | 11.6 | 1.24 (1.10-1.41)  |         |
| 2 to 5 years since                       | 3095                 | 26.7 | 8496          | 25.4 | 1.89 (1.68-2.12)  |         |
| ≥ 5 years                                | 6596                 | 56.8 | 16735         | 50.1 | 2.17 (1.93-2.44)  |         |
| <b>Previous oral AC treatment</b>        |                      |      |               |      |                   | <.0001  |
| No previous treatment                    | 8093                 | 69.7 | 21189         | 63.4 | Reference         |         |
| NOAC only                                | 87                   | 0.7  | 411           | 1.2  | 0.61 (0.46-0.81)  |         |
| VKA and NOAC                             | 76                   | 0.7  | 490           | 1.5  | 0.37 (0.29-0.47)  |         |
| VKA only                                 | 3353                 | 28.9 | 11323         | 33.9 | 0.65 (0.59-0.72)  |         |
| <b>Previous stroke/TIA/arterial TE</b>   | 2291                 | 19.7 | 7341          | 22.0 | 0.83 (0.75-0.92)  | 0.0008  |
| <b>Congestive heart failure</b>          | 1722                 | 14.8 | 6685          | 20.0 | 0.61 (0.56-0.66)  | <.0001  |
| <b>Previous coronary artery disease</b>  | 4535                 | 39.1 | 9636          | 28.8 | 1.60 (1.50--1.71) | <.0001  |

|                                    | Antiplatelet therapy |      | Treated with  |      | OR (95% CI)      | P-value |
|------------------------------------|----------------------|------|---------------|------|------------------|---------|
|                                    | alone                |      | anticoagulant |      |                  |         |
|                                    | N=11,609             |      | N= 33,413     |      |                  |         |
|                                    | n                    | %    | N             | %    |                  |         |
| <b>Peripheral arterial disease</b> | 833                  | 7.2  | 1887          | 5.6  | 1.20 (1.10-1.31) | 0.0001  |
| <b>Hypertension</b>                | 11308                | 97.4 | 32869         | 98.4 | 0.59 (0.51-0.69) | <.0001  |
| <b>CHA2DS2-VASc score</b>          |                      |      |               |      |                  | <.0001  |
| 2                                  | 1425                 | 12.3 | 3444          | 10.3 | Reference        |         |
| 3                                  | 2408                 | 20.7 | 7482          | 22.4 | 0.69 (0.63-0.76) |         |
| 4                                  | 3206                 | 27.6 | 9656          | 28.9 | 0.56 (0.50-0.64) |         |
| 5                                  | 2306                 | 19.9 | 6544          | 19.6 | 0.54 (0.46-0.64) |         |
| ≥6                                 | 2264                 | 19.5 | 6287          | 18.9 | 0.52 (0.42-0.65) |         |
| <b>Previous bleed</b>              |                      |      |               |      |                  | <.0001  |
| No bleed                           | 7522                 | 64.8 | 21577         | 64.6 | Reference        |         |
| Intracranial bleed                 | 346                  | 3.0  | 404           | 1.2  | 3.02 (2.56-3.56) |         |
| Gastrointestinal bleed             | 1430                 | 12.3 | 4001          | 11.8 | 0.96 (0.90-1.02) |         |
| Other bleed                        | 2311                 | 19.9 | 7473          | 22.4 | 0.82 (0.77-0.87) |         |
| <b>History of fall</b>             | 3474                 | 29.9 | 8211          | 24.6 | 1.14 (1.08-1.20) | <.0001  |
| <b>Renal disease</b>               | 4106                 | 35.4 | 11542         | 34.5 | 0.94 (0.90-0.99) | 0.0131  |
| <b>Liver disease</b>               | 102                  | 0.9  | 214           | 0.6  | 1.32 (1.03-1.70) | 0.0414  |
| <b>Number of comedications</b>     |                      |      |               |      |                  | <.0001  |
| < 5                                | 1448                 | 12.5 | 6879          | 20.6 | Reference        |         |
| 5 to 9                             | 5040                 | 43.4 | 14825         | 44.4 | 1.71 (1.60-1.82) |         |
| 10 to 14                           | 3169                 | 27.3 | 7782          | 23.3 | 2.08 (1.93-2.26) |         |
| 15 or more                         | 1952                 | 16.8 | 3927          | 11.8 | 2.66 (2.43-2.91) |         |

Abbreviations: CI, confidence interval; GEE, generalised estimating equations; VKA, vitamin K antagonist; OAC, oral anticoagulant; NVAF, non-valvular atrial fibrillation; TIA, transient ischaemic attack; TE, thromboembolism; OR, odds ratio; NOAC, novel oral anticoagulant.



Management of NVAF in Europe and the UK

**Table 4. Factor associated with the absence of TE prevention (no antithrombotic therapy vs. anticoagulation) in NVAF in April 2015: results of the GEE model**

| Parameter                                | No antithrombotic therapy |      | Treated with anticoagulant |      | OR (95% CI)      | P-value |
|------------------------------------------|---------------------------|------|----------------------------|------|------------------|---------|
|                                          | N=8,128                   |      | N= 33,413                  |      |                  |         |
|                                          | n                         | %    | n                          | %    |                  |         |
| <b>Patient age (years)</b>               |                           |      |                            |      |                  | <.0001  |
| < 65                                     | 1299                      | 16   | 2016                       | 6.0  | 1.64 (1.47-1.83) |         |
| 65 to 74                                 | 2214                      | 27.2 | 8780                       | 26.3 | Reference        |         |
| 75 to 84                                 | 2367                      | 29.1 | 14363                      | 43.0 | 1.09 (0.99-1.20) |         |
| ≥ 85                                     | 2248                      | 27.7 | 8254                       | 24.7 | 1.86 (1.68-2.07) |         |
| <b>Gender: male (reference = female)</b> | 4450                      | 54.7 | 14580                      | 43.6 | 0.51 (0.46-0.56) | <.0001  |
| <b>Country</b>                           |                           |      |                            |      |                  |         |
| England                                  | 5936                      | 73.0 | 22909                      | 68.6 | Reference        | <.0001  |
| Wales                                    | 884                       | 10.9 | 4524                       | 13.5 | 0.80 (0.69-0.93) |         |
| Scotland                                 | 1029                      | 12.7 | 4231                       | 12.7 | 1.09 (0.96-1.23) |         |
| Northern Ireland                         | 279                       | 3.4  | 1749                       | 5.2  | 0.69 (0.57-0.83) |         |
| <b>Time since NVAF diagnosis</b>         |                           |      |                            |      |                  | <.0001  |
| < 6 months                               | 592                       | 7.3  | 2121                       | 6.3  | Reference        |         |
| 6 to 12 months                           | 427                       | 5.3  | 2175                       | 6.5  | 0.71 (0.61-0.82) |         |
| 12 to 24 months                          | 864                       | 10.6 | 3886                       | 11.6 | 0.82 (0.71-0.94) |         |
| 2 to 5 years                             | 2086                      | 25.7 | 8496                       | 25.4 | 0.93 (0.82-1.06) |         |
| ≥ 5 years                                | 4159                      | 51.2 | 16735                      | 50.1 | 1.07 (0.94-1.23) |         |
| <b>Previous OAC treatment</b>            |                           |      |                            |      |                  | <.0001  |
| No previous OAC                          | 5137                      | 63.2 | 21189                      | 63.4 | Reference        |         |
| NOAC only                                | 189                       | 2.3  | 411                        | 1.2  | 1.82 (1.36-2.43) |         |
| VKA and NOAC                             | 159                       | 2.0  | 490                        | 1.5  | 1.50 (1.23-1.84) |         |
| VKA only                                 | 2643                      | 32.5 | 11323                      | 33.9 | 0.97 (0.88-1.07) |         |
| <b>Previous stroke/TIA/ arterial TE</b>  | 968                       | 11.9 | 7341                       | 22.0 | 0.55 (0.48-0.64) | <.0001  |
| <b>Congestive heart failure</b>          | 889                       | 10.9 | 6685                       | 20.0 | 0.76 (0.69-0.84) | <.0001  |

## Management of NVAF in Europe and the UK

| Parameter                               | No antithrombotic therapy |       | Treated with anticoagulant |      | OR (95% CI)       | P-value |
|-----------------------------------------|---------------------------|-------|----------------------------|------|-------------------|---------|
|                                         | N=8,128                   |       | N= 33,413                  |      |                   |         |
|                                         | n                         | %     | n                          | %    |                   |         |
| <b>Previous coronary artery disease</b> | 1212                      | 14.9  | 9636                       | 28.8 | 0.76 (0.70-0.84)  | <.0001  |
| <b>Hypertension</b>                     | 7695                      | 94.7  | 32869                      | 98.4 | 0.62 (0.53-0.72)  | <.0001  |
| <b>CHA2DS2-VASc score</b>               |                           |       |                            |      |                   | <.0001  |
| 2                                       | 2212                      | 27.2  | 3444                       | 10.3 | Reference         |         |
| 3                                       | 2034                      | 25    | 7482                       | 22.4 | 0.48 (0.43-0.54)  |         |
| 4                                       | 2057                      | 25.3  | 9656                       | 28.9 | 0.33 (0.28-0.39)  |         |
| 5                                       | 987                       | 12.1  | 6544                       | 19.6 | 0.28 (0.22-0.35)  |         |
| ≥6                                      | 838                       | 10.27 | 6287                       | 18.9 | 0.27 (0.20-0.36)  |         |
| <b>Previous bleed</b>                   |                           |       |                            |      |                   | <.0001  |
| No bleed                                | 5382                      | 66.2  | 21577                      | 64.6 | Reference         |         |
| IC bleed                                | 289                       | 3.6   | 404                        | 1.2  | 8.03 (6.43-10.02) |         |
| GI bleed                                | 1016                      | 12.5  | 4001                       | 11.8 | 1.24 (1.14-1.35)  |         |
| Other bleed                             | 1441                      | 17.7  | 7473                       | 22.4 | 0.91 (0.85-0.97)  |         |
| <b>History of peptic ulcer</b>          | 465                       | 5.7   | 1743                       | 5.2  | 1.36 (1.21-1.52)  | <.0001  |
| <b>History of anaemia</b>               | 227                       | 2.8   | 880                        | 2.6  | 1.44 (1.24-1.67)  | <.0001  |
| <b>History of fall</b>                  | 2097                      | 25.8  | 8211                       | 24.6 | 1.20 (1.13-1.28)  | <.0001  |
| <b>Renal disease</b>                    | 2148                      | 26.4  | 11542                      | 34.5 | 0.90 (0.84-0.96)  | 0.0016  |
| <b>Liver disease</b>                    | 109                       | 1.3   | 214                        | 0.6  | 2.39 (1.87-3.05)  | <.0001  |
| <b>Active cancer</b>                    | 455                       | 3.9   | 1367                       | 4.1  | 1.19 (1.06-1.35)  | 0.0053  |
| <b>Number of co-medications</b>         |                           |       |                            |      |                   | <.0001  |
| < 5                                     | 3384                      | 41.6  | 6879                       | 20.6 | Reference         |         |
| 5 to 9                                  | 2791                      | 34.3  | 14825                      | 44.4 | 0.49 (0.45-0.52)  |         |
| 10 to 14                                | 1271                      | 15.6  | 7782                       | 23.3 | 0.46 (0.43-0.50)  |         |
| ≥15                                     | 682                       | 8.4   | 3927                       | 11.8 | 0.53 (0.48-0.59)  |         |

Abbreviations: CI, confidence interval; GEE, generalised estimating equations; VKA, vitamin K antagonist; OAC, oral anticoagulant; NVAF, non-valvular atrial fibrillation; TIA, transient ischaemic attack; TE, thromboembolism; OR, odds ratio; NOAC, novel oral anticoagulant

1  
2  
3  
4  
5  
6  
7  
8  
9  
10  
11  
12  
13  
14  
15  
16  
17  
18  
19  
20  
21  
22  
23  
24  
25  
26  
27  
28  
29  
30  
31  
32  
33  
34  
35  
36  
37  
38  
39  
40  
41  
42  
43  
44  
45  
46  
47  
48  
49  
50  
51  
52  
53  
54  
55  
56  
57  
58  
59  
60



172x246mm (300 x 300 DPI)

1  
2  
3  
4  
5  
6  
7  
8  
9  
10  
11  
12  
13  
14  
15  
16  
17  
18  
19  
20  
21  
22  
23  
24  
25  
26  
27  
28  
29  
30  
31  
32  
33  
34  
35  
36  
37  
38  
39  
40  
41  
42  
43  
44  
45  
46  
47  
48  
49  
50  
51  
52  
53  
54  
55  
56  
57  
58  
59  
60

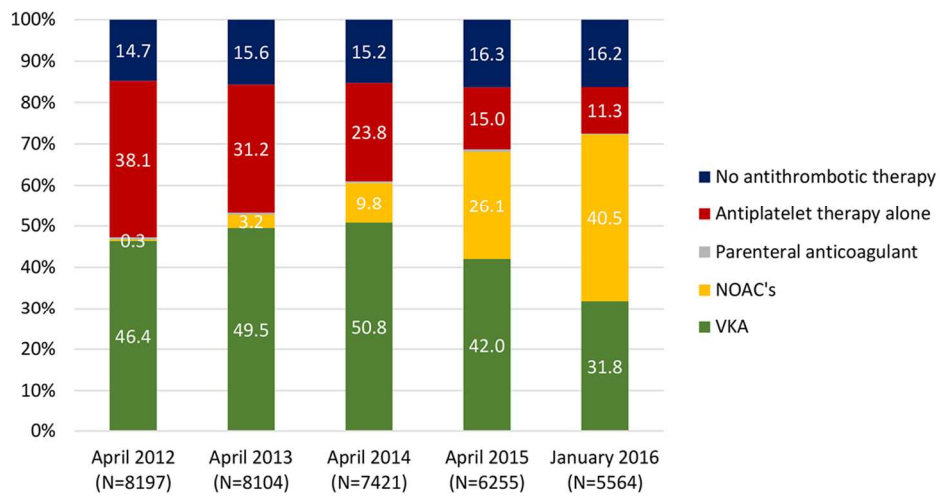

113x60mm (300 x 300 DPI)

review only



Figure 2

113x59mm (300 x 300 DPI)

review only

1  
2  
3  
4  
5  
6  
7  
8  
9  
10  
11  
12  
13  
14  
15  
16  
17  
18  
19  
20  
21  
22  
23  
24  
25  
26  
27  
28  
29  
30  
31  
32  
33  
34  
35  
36  
37  
38  
39  
40  
41  
42  
43  
44  
45  
46  
47  
48  
49  
50  
51  
52  
53  
54  
55  
56  
57  
58  
59  
60

1  
2  
3  
4  
5  
6  
7  
8  
9  
10  
11  
12  
13  
14  
15  
16  
17  
18  
19  
20  
21  
22  
23  
24  
25  
26  
27  
28  
29  
30  
31  
32  
33  
34  
35  
36  
37  
38  
39  
40  
41  
42  
43  
44  
45  
46  
47  
48  
49  
50  
51  
52  
53  
54  
55  
56  
57  
58  
59  
60

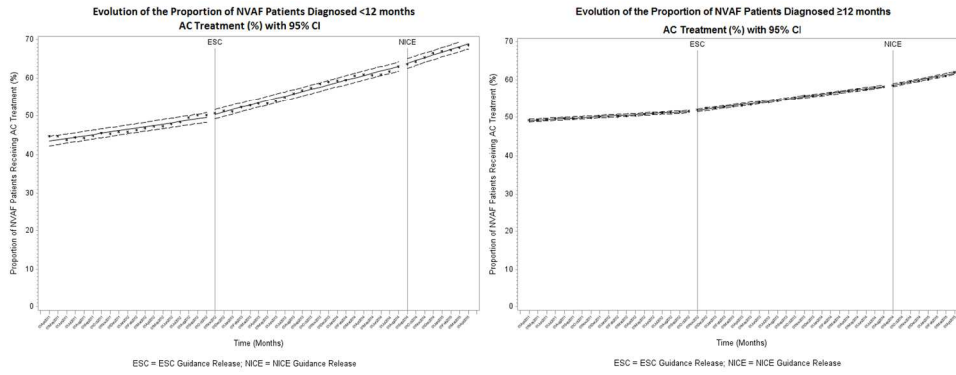

172x68mm (300 x 300 DPI)

Peer review only

1  
2  
3  
4  
5  
6  
7  
8  
9  
10  
11  
12  
13  
14  
15  
16  
17  
18  
19  
20  
21  
22  
23  
24  
25  
26  
27  
28  
29  
30  
31  
32  
33  
34  
35  
36  
37  
38  
39  
40  
41  
42  
43  
44  
45  
46  
47  
48  
49  
50  
51  
52  
53  
54  
55  
56  
57  
58  
59  
60

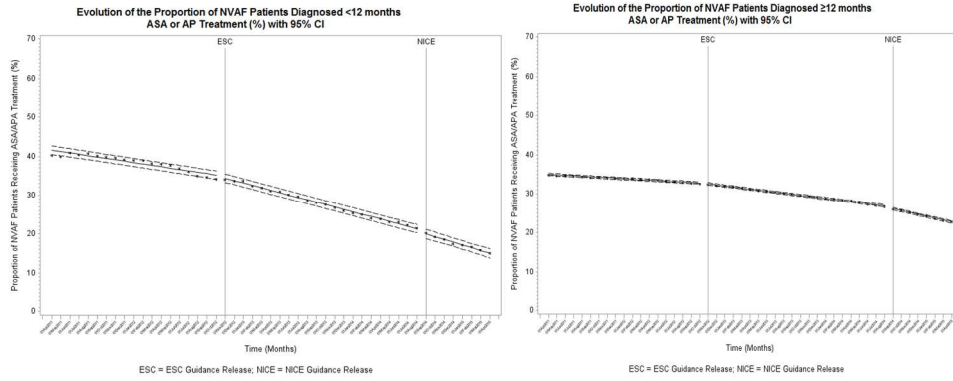

172x70mm (300 x 300 DPI)

Peer review only

1  
2  
3  
4  
5  
6  
7  
8  
9  
10  
11  
12  
13  
14  
15  
16  
17  
18  
19  
20  
21  
22  
23  
24  
25  
26  
27  
28  
29  
30  
31  
32  
33  
34  
35  
36  
37  
38  
39  
40  
41  
42  
43  
44  
45  
46  
47  
48  
49  
50  
51  
52  
53  
54  
55  
56  
57  
58  
59  
60

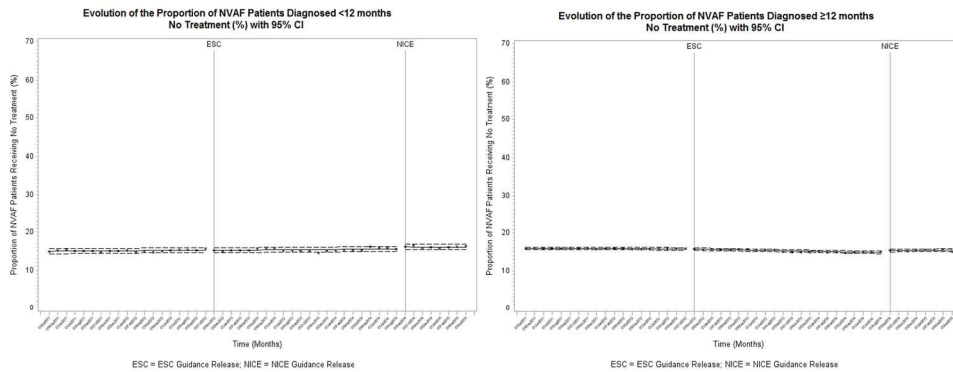

172x70mm (300 x 300 DPI)

Peer review only



1 Management of NVAf in Europe and the UK  
 2  
 3

4 DATA SUPPLEMENT  
 5

6 Table s1. READ code descriptions  
 7

| 8 G11..00  | Mitral valve diseases                                     |
|------------|-----------------------------------------------------------|
| 9 G540.15  | Mitral valve prolapse                                     |
| 10 G110.00 | Mitral stenosis                                           |
| 11 G540.00 | Mitral valve incompetence                                 |
| 12 G541.00 | Aortic valve disorders                                    |
| 13 G540000 | Mitral incompetence, non-rheumatic                        |
| 14 G130.00 | Mitral and aortic stenosis                                |
| 15 G13..00 | Diseases of mitral and aortic valves                      |
| 16 G541400 | Aortic valve stenosis with insufficiency                  |
| 17 G131.14 | Mitral stenosis and aortic regurgitation                  |
| 18 G544200 | Combined disorders of mitral, aortic and tricuspid valves |
| 19 G541z00 | Aortic valve disorders NOS                                |
| 20 G544100 | Disorders of both mitral and tricuspid valves             |
| 21 G540z00 | Mitral valve disorders NOS                                |
| 22 G113.00 | Nonrheumatic mitral valve stenosis                        |
| 23 G13z.00 | Mitral and aortic valve disease NOS                       |
| 24 G11z.00 | Mitral valve disease NOS                                  |
| 25 G133.00 | Mitral and aortic incompetence                            |
| 26 G132.12 | Mitral incompetence and aortic stenosis                   |
| 27 G540200 | Mitral valve prolapse                                     |
| 28 G132.00 | Mitral insufficiency and aortic stenosis                  |
| 29 G132.13 | Mitral regurgitation and aortic stenosis                  |
| 30 G540100 | Mitral incompetence, cause unspecified                    |
| 31 G540300 | Mitral valve leaf prolapse                                |
| 32 G544.00 | Multiple valve diseases                                   |
| 33 G540.12 | Mitral valve insufficiency                                |
| 34 G112.13 | Mitral stenosis with regurgitation                        |
| 35 G112.00 | Mitral stenosis with insufficiency                        |
| 36 Gyu5600 | [X]Other aortic valve disorders                           |
| 37 G131.00 | Mitral stenosis and aortic insufficiency                  |
| 38 G12z.00 | Rheumatic aortic valve disease NOS                        |
| 39 G112.12 | Mitral stenosis with incompetence                         |
| 40 Gyu1000 | [X]Other mitral valve diseases                            |
| 41 P65..00 | Congenital mitral stenosis                                |

1 Management of NVAf in Europe and the UK  
 2  
 3

|    |                                                    |                                                            |
|----|----------------------------------------------------|------------------------------------------------------------|
| 4  | G544X00                                            | Multiple valve disease, unspecified                        |
| 5  | G114.00                                            | Ruptured mitral valve cusp                                 |
| 6  | G131.13                                            | Mitral stenosis and aortic incompetence                    |
| 7  | P66..00                                            | Congenital mitral insufficiency                            |
| 8  | P652.00                                            | Parachute deformity of the mitral valve                    |
| 9  | G13y.00                                            | Multiple mitral and aortic valve involvement               |
| 10 | Gyu5A00                                            | [X]Aortic valve disorders in diseases classified elsewhere |
| 11 | P650.00                                            | Congenital mitral stenosis, unspecified                    |
| 12 | G133.11                                            | Mitral and aortic insufficiency                            |
| 13 | Gyu5500                                            | [X]Other nonrheumatic mitral valve disorders               |
| 14 | P65z.00                                            | Congenital mitral stenosis NOS                             |
| 15 | Gyu5D00                                            | [X]Multiple valve disorders/diseases CE                    |
| 16 | <b>READ Codes for prosthetic valve description</b> |                                                            |
| 17 | 7911.12                                            | Replacement of aortic valve                                |
| 18 | P641.00                                            | Bicuspid aortic valve                                      |
| 19 | 7910300                                            | Replacement of mitral valve NEC                            |
| 20 | 7910.12                                            | Replacement of mitral valve                                |
| 21 | 7910.12                                            | Replacement of mitral valve                                |
| 22 | 7914300                                            | Replacement of valve of heart NEC                          |
| 23 | 7914200                                            | Prosthetic replacement of valve of heart NEC               |
| 24 | 7910.00                                            | Plastic repair of mitral valve                             |
| 25 | 7911.00                                            | Plastic repair of aortic valve                             |
| 26 | 7911300                                            | Replacement of aortic valve NEC                            |
| 27 | 7915000                                            | Revision of plastic repair of mitral valve                 |
| 28 | 7916000                                            | Open mitral valvotomy                                      |
| 29 | 7917000                                            | Closed mitral valvotomy                                    |
| 30 | 7910200                                            | Prosthetic replacement of mitral valve                     |
| 31 | 7910200                                            | Prosthetic replacement of mitral valve                     |
| 32 | 7910400                                            | Mitral valvuloplasty NEC                                   |
| 33 | ZV43300                                            | [V]Has artificial heart valve                              |
| 34 | 7914.11                                            | Replacement of unspecified valve of heart                  |
| 35 | 7910211                                            | Bjork-Shiley prosthetic replacement of mitral valve        |
| 36 | 7911200                                            | Prosthetic replacement of aortic valve                     |
| 37 | 7910.11                                            | Mitral valvuloplasty                                       |
| 38 | 7914212                                            | Starr prosthetic replacement of valve of heart             |
| 39 | 7911100                                            | Xenograft replacement of aortic valve                      |

1 Management of NVAf in Europe and the UK  
 2  
 3

|    |         |                                                            |
|----|---------|------------------------------------------------------------|
| 4  | 7911y00 | Other specified plastic repair of aortic valve             |
| 5  | ZV45H00 | [V]Presence of prosthetic heart valve                      |
| 6  |         |                                                            |
| 7  | 7910z00 | Plastic repair of mitral valve NOS                         |
| 8  |         |                                                            |
| 9  | 7911000 | Allograft replacement of aortic valve                      |
| 10 |         |                                                            |
| 11 | 7915100 | Revision of plastic repair of aortic valve                 |
| 12 | 7914211 | Edwards prosthetic replacement of valve of heart           |
| 13 | TB01200 | Implant of heart valve prosthesis + complication, no blame |
| 14 |         |                                                            |
| 15 | 7910213 | Carpentier prosthetic replacement of mitral valve          |
| 16 | 7910100 | Xenograft replacement of mitral valve                      |
| 17 |         |                                                            |
| 18 | 7919000 | Percutaneous transluminal mitral valvotomy                 |
| 19 |         |                                                            |
| 20 | 7911z00 | Plastic repair of aortic valve NOS                         |
| 21 | 7910212 | Bjork-Shiley prosthetic replacement of mitral valve        |
| 22 | 7910y00 | Other specified plastic repair of mitral valve             |
| 23 |         |                                                            |
| 24 | SP00200 | Mechanical complication of heart valve prosthesis          |
| 25 | SyuK611 | [X] Embolism from prosthetic heart valve                   |
| 26 |         |                                                            |
| 27 | 790D700 | Replacement of valved cardiac conduit                      |
| 28 |         |                                                            |
| 29 | 7914100 | Xenograft replacement of valve of heart NEC                |
| 30 | 7914000 | Allograft replacement of valve of heart NEC                |
| 31 | ZVu6e00 | [X]Presence of other heart valve replacement               |
| 32 |         |                                                            |
| 33 | 7910214 | Edwards prosthetic replacement of mitral valve             |
| 34 | 7910411 | Mitral valve repair NEC                                    |
| 35 |         |                                                            |
| 36 | 7911411 | Aortic valve repair NEC                                    |
| 37 |         |                                                            |
| 38 | 7910000 | Allograft replacement of mitral valve                      |
| 39 | 7911600 | Transluminal aortic valve implantation                     |
| 40 | 7911500 | Transapical aortic valve implantation                      |
| 41 |         |                                                            |
| 42 | 7914600 | Replacement of truncal valve                               |
| 43 |         |                                                            |
| 44 | 7918000 | Annuloplasty of mitral valve                               |
| 45 |         |                                                            |
| 46 |         |                                                            |
| 47 |         |                                                            |
| 48 |         |                                                            |
| 49 |         |                                                            |
| 50 |         |                                                            |
| 51 |         |                                                            |
| 52 |         |                                                            |
| 53 |         |                                                            |
| 54 |         |                                                            |
| 55 |         |                                                            |
| 56 |         |                                                            |
| 57 |         |                                                            |
| 58 |         |                                                            |
| 59 |         |                                                            |
| 60 |         |                                                            |

Management of NVAF in Europe and the UK

Table s2. Proportion of patients with NVAF treated in April 2012, 2013, 2014, and 2015 in the UK, according to duration of diagnosis

|                                   | April 2012<br>% [95% CI] | April 2013<br>% [95% CI] | April 2014<br>% [95% CI] | April 2015<br>% [95% CI] | January 2016<br>% [95% CI] |
|-----------------------------------|--------------------------|--------------------------|--------------------------|--------------------------|----------------------------|
| <i>Diagnosed &lt; 12 months</i>   |                          |                          |                          |                          |                            |
| <b>Anticoagulation treatment</b>  | <b>47.2 [46.2-48.3]</b>  | <b>53.2 [52.1-54.2]</b>  | <b>61.0 [59.9-62.0]</b>  | <b>68.7 [67.6-69.8]</b>  | <b>72.5 [71.3-73.7]</b>    |
| VKA                               | 46.4 [45.4-47.4]         | 49.5 [48.5-50.6]         | 50.8 [49.7-51.9]         | 42.0 [40.8-43.1]         | 31.8 [30.6-33.0]           |
| Apixaban                          | -                        | -                        | 1.7 [1.5-2.0]            | 8.8 [8.1-9.5]            | 16.6 [15.6-17.5]           |
| Rivaroxaban                       | -                        | 1.2 [1.0-1.5]            | 5.5 [5.0-6.0]            | 14.5 [13.7-15.3]         | 21.5 [20.4-22.6]           |
| Dabigatran                        | 0.3 [0.2-0.4]            | 2.0 [1.7-2.3]            | 2.6 [2.3-2.9]            | 2.8 [2.5-3.2]            | 2.4 [2.0-2.8]              |
| Parenteral anticoagulant          | 0.5 [0.4-0.6]            | 0.5 [0.3-0.6]            | 0.4 [0.2-0.5]            | 0.6 [0.4-0.8]            | 0.2 [0.1-0.4]              |
| <b>Antiplatelet therapy alone</b> | <b>38.1 [37-39.1]</b>    | <b>31.2 [30.2-32.1]</b>  | <b>23.8 [22.9-24.8]</b>  | <b>15 [14.2-15.9]</b>    | <b>11.3 [10.5-12.1]</b>    |
| <b>No antithrombotic therapy</b>  | <b>14.7 [14-15.4]</b>    | <b>15.6 [14.9-16.4]</b>  | <b>15.2 [14.4-16]</b>    | <b>16.3 [15.4-17.2]</b>  | <b>16.2 [15.2-17.1]</b>    |
| <i>Diagnosed ≥ 12 months</i>      |                          |                          |                          |                          |                            |
| <b>Anticoagulation treatment</b>  | <b>50.6 [50.2-51.0]</b>  | <b>53.2 [52.8-53.5]</b>  | <b>57.0 [56.6-57.4]</b>  | <b>62.1 [61.7-62.5]</b>  | <b>66.1 [65.6-66.6]</b>    |
| VKA                               | 50.2 [49.8-50.6]         | 51.7 [51.3-52.1]         | 53.1 [52.7-53.5]         | 53.0 [52.5-53.4]         | 50.9 [50.4-51.4]           |
| Apixaban                          | -                        | -                        | 0.4 [0.3-0.4]            | 2.0 [1.9-2.1]            | 4.5 [4.3-4.7]              |
| Rivaroxaban                       | -                        | 0.5 [0.4-0.5]            | 1.9 [1.8-2.0]            | 4.9 [4.7-5.1]            | 8.3 [8.0-8.6]              |
| Dabigatran                        | 0.1 [0.1-0.1]            | 0.7 [0.7-0.8]            | 1.4 [1.3-1.5]            | 2.0 [1.9-2.1]            | 2.2 [2.1-2.4]              |
| Parenteral anticoagulant          | 0.2 [0.2-0.3]            | 0.3 [0.2-0.3]            | 0.3 [0.2-0.3]            | 0.2 [0.2-0.3]            | 0.2 [0.2-0.3]              |
| <b>Antiplatelet therapy alone</b> | <b>33.7 [33.3-34.0]</b>  | <b>31.2 [30.8-31.5]</b>  | <b>28.2 [27.8-28.5]</b>  | <b>22.8 [22.4-23.1]</b>  | <b>18.3 [17.9-18.7]</b>    |
| <b>No antithrombotic therapy</b>  | <b>15.8 [15.5-16.0]</b>  | <b>15.7 [15.4-16.0]</b>  | <b>14.8 [14.5-15.1]</b>  | <b>15.2 [14.8-15.5]</b>  | <b>15.6 [15.3-16.0]</b>    |

Abbreviations: CI, confidence interval; VKA, vitamin K antagonists

Management of NVAF in Europe and the UK

Table s3. Proportion of patients with NVAF treated in April 2012, 2013, 2014, and 2015 in the UK, according to country of residence

|                                   | April 2012<br>% [95% CI] | April 2013<br>% [95% CI] | April 2014<br>% [95% CI] | April 2015<br>% [95% CI] | January 2016<br>% [95% CI] |
|-----------------------------------|--------------------------|--------------------------|--------------------------|--------------------------|----------------------------|
| <i>England</i>                    |                          |                          |                          |                          |                            |
| <b>Anticoagulation treatment</b>  | <b>49.6 [49.2-50]</b>    | <b>52.4 [52-52.9]</b>    | <b>56.9 [56.5-57.4]</b>  | <b>62.1 [61.6-62.5]</b>  | <b>66.5 [66.0-67.1]</b>    |
| VKA                               | 49.2 [48.8-49.6]         | 50.8 [50.4-51.2]         | 52.4 [51.9-52.8]         | 51.3 [50.8-51.8]         | 47.9 [47.4-48.5]           |
| Apixaban                          | -                        | -                        | 0.4 [0.4-0.5]            | 2.3 [2.2-2.5]            | 5.0 [4.8-5.3]              |
| Rivaroxaban                       | -                        | 0.5 [0.4-0.5]            | 2.1 [2.0-2.2]            | 5.7 [5.5-5.9]            | 10.7 [10.3-11.0]           |
| Dabigatran                        | 0.1 [0.1-0.1]            | 0.9 [0.8-1.0]            | 1.7 [1.6-1.8]            | 2.4 [2.3-2.6]            | 2.6 [2.4-2.8]              |
| Parenteral anticoagulant          | 0.3 [0.2-0.3]            | 0.3 [0.2-0.3]            | 0.3 [0.3-0.4]            | 0.3 [0.3-0.4]            | 0.2 [0.2-0.3]              |
| <b>Antiplatelet therapy alone</b> | <b>33.9 [33.5-34.3]</b>  | <b>30.9 [30.6-31.3]</b>  | <b>27.5 [27.1-27.9]</b>  | <b>21.9 [21.4-22.3]</b>  | <b>17.0 [16.5-17.4]</b>    |
| <b>No antithrombotic therapy</b>  | <b>16.5 [16.2-16.8]</b>  | <b>16.6 [16.3-16.9]</b>  | <b>15.6 [15.3-15.9]</b>  | <b>16.1 [15.7-16.4]</b>  | <b>16.5 [16.1-17.0]</b>    |
| <i>Scotland</i>                   |                          |                          |                          |                          |                            |
| <b>Anticoagulation treatment</b>  | <b>48.8 [47.7-49.9]</b>  | <b>51.9 [50.8-53]</b>    | <b>55.5 [54.4-56.6]</b>  | <b>61.8 [60.7-62.9]</b>  | <b>64.3 [63.2-65.4]</b>    |
| VKA                               | 48.2 [47.1-49.3]         | 49.2 [48.1-50.3]         | 49.1 [48.0-50.2]         | 48.4 [47.2-49.5]         | 45.2 [44-46.3]             |
| Apixaban                          | -                        | -                        | 0.5 [0.3-0.6]            | 2.7 [2.3-3.0]            | 6.6 [6.0-7.2]              |
| Rivaroxaban                       | -                        | 1.8 [1.5-2.0]            | 5.0 [4.5-5.4]            | 9.8 [9.1-10.5]           | 11.6 [10.8-12.3]           |
| Dabigatran                        | 0.4 [0.2-0.5]            | 0.5 [0.4-0.7]            | 0.7 [0.5-0.8]            | 0.7 [0.5-0.8]            | 0.8 [0.6-1.0]              |
| Parenteral anticoagulant          | 0.2 [0.1-0.3]            | 0.4 [0.2-0.5]            | 0.3 [0.2-0.4]            | 0.2 [0.1-0.3]            | 0.1 [0.1-0.2]              |
| <b>Antiplatelet therapy alone</b> | <b>37 [35.9-38.1]</b>    | <b>33.6 [32.6-34.7]</b>  | <b>29.6 [28.6-30.6]</b>  | <b>23.2 [22.3-24.2]</b>  | <b>19.9 [19.0-20.8]</b>    |
| <b>No antithrombotic therapy</b>  | <b>14.2 [13.4-15.0]</b>  | <b>14.5 [13.7-15.3]</b>  | <b>14.9 [14.2-15.7]</b>  | <b>15 [14.2-15.8]</b>    | <b>15.8 [14.9-16.6]</b>    |
| <i>Wales</i>                      |                          |                          |                          |                          |                            |
| <b>Anticoagulation treatment</b>  | <b>55.1 [54.0-56.2]</b>  | <b>58.7 [57.7-59.8]</b>  | <b>61.7 [60.6-62.7]</b>  | <b>66.6 [65.5-67.7]</b>  | <b>69.1 [68.0-70.2]</b>    |
| VKA                               | 54.8 [53.7-55.9]         | 57.6 [56.5-58.7]         | 59.1 [58.0-60.1]         | 59.3 [58.1-60.4]         | 57.6 [56.5-58.8]           |
| Apixaban                          | -                        | 0.0 [0.0-0.1]            | 0.3 [0.2-0.4]            | 2.2 [1.9-2.5]            | 3.9 [3.4-4.3]              |
| Rivaroxaban                       | -                        | 0.1 [0.0-0.2]            | 0.9 [0.7-1.1]            | 3.2 [2.8-3.6]            | 5.1 [4.6-5.6]              |
| Dabigatran                        | 0.0 [0.0-0.1]            | 0.9 [0.6-1.1]            | 1.3 [1.1-1.5]            | 1.9 [1.6-2.2]            | 2.3 [2.0-2.7]              |
| Parenteral anticoagulant          | 0.2 [0.1-0.3]            | 0.2 [0.1-0.3]            | 0.1 [0.1-0.2]            | 0.1 [0.0-0.1]            | 0.2 [0.1-0.2]              |
| <b>Antiplatelet therapy alone</b> | <b>32.5 [31.5-33.6]</b>  | <b>29.4 [28.4-30.4]</b>  | <b>26.7 [25.8-27.7]</b>  | <b>20.4 [19.4-21.3]</b>  | <b>16.8 [15.9-17.7]</b>    |
| <b>No antithrombotic therapy</b>  | <b>12.4 [11.6-13.1]</b>  | <b>11.9 [11.2-12.6]</b>  | <b>11.6 [10.9-12.3]</b>  | <b>13.0 [12.2-13.8]</b>  | <b>14.1 [13.3-14.9]</b>    |
| <i>Northern Ireland</i>           |                          |                          |                          |                          |                            |
| <b>Anticoagulation treatment</b>  | <b>51.5 [49.6-53.5]</b>  | <b>55 [53.0-56.9]</b>    | <b>60.8 [59.0-62.7]</b>  | <b>67.3 [65.6-69.0]</b>  | <b>71.9 [70.2-73.6]</b>    |
| VKA                               | 50.7 [48.7-52.7]         | 52.4 [50.4-54.3]         | 51.5 [49.6-53.4]         | 46 [44.2-47.9]           | 39.7 [37.9-41.6]           |
| Apixaban                          | -                        | 0.1 [0.0-0.2]            | 3.1 [2.4-3.7]            | 11.1 [10.0-12.3]         | 19.1 [17.6-20.6]           |
| Rivaroxaban                       | -                        | 0.4 [0.1-0.6]            | 3.5 [2.8-4.2]            | 7.5 [6.5-8.4]            | 10.7 [9.5-11.8]            |
| Dabigatran                        | 0.5 [0.2-0.8]            | 1.6 [1.1-2.1]            | 2.5 [1.9-3.1]            | 2.3 [1.8-2.9]            | 2.1 [1.6-2.7]              |

Management of NVAF in Europe and the UK

|                            | April 2012       | April 2013       | April 2014       | April 2015      | January 2016     |
|----------------------------|------------------|------------------|------------------|-----------------|------------------|
|                            | % [95% CI]       | % [95% CI]       | % [95% CI]       | % [95% CI]      | % [95% CI]       |
| Parenteral anticoagulant   | 0.3 [0.1-0.5]    | 0.6 [0.3-0.8]    | 0.2 [0.1-0.4]    | 0.3 [0.1-0.6]   | 0.3 [0.1-0.5]    |
| Antiplatelet therapy alone | 37.9 [35.9-39.8] | 34.1 [32.2-35.9] | 28.2 [26.4-29.9] | 22 [20.4-23.5]  | 17.2 [15.8-18.6] |
| No antithrombotic therapy  | 10.6 [9.4-11.8]  | 11 [9.8-12.2]    | 11.0 [9.8-12.2]  | 10.7 [9.6-11.9] | 10.9 [9.8-12.1]  |

Abbreviations: CI, confidence interval; VKA, vitamin K antagonists

Highly Confidential  
For peer review only

**STROBE 2007 (v4) checklist of items to be included in reports of observational studies in epidemiology\***  
**Checklist for cohort, case-control, and cross-sectional studies (combined)**

| Section/Topic             | Item # | Recommendation                                                                                                                                                                                                                                                                                                                                                                                                                                                         | Reported on page # |
|---------------------------|--------|------------------------------------------------------------------------------------------------------------------------------------------------------------------------------------------------------------------------------------------------------------------------------------------------------------------------------------------------------------------------------------------------------------------------------------------------------------------------|--------------------|
| Title and abstract        | 1      | (a) Indicate the study's design with a commonly used term in the title or the abstract                                                                                                                                                                                                                                                                                                                                                                                 | 2                  |
|                           |        | (b) Provide in the abstract an informative and balanced summary of what was done and what was found                                                                                                                                                                                                                                                                                                                                                                    | 2                  |
| <b>Introduction</b>       |        |                                                                                                                                                                                                                                                                                                                                                                                                                                                                        |                    |
| Background/rationale      | 2      | Explain the scientific background and rationale for the investigation being reported                                                                                                                                                                                                                                                                                                                                                                                   | 4                  |
| Objectives                | 3      | State specific objectives, including any pre-specified hypotheses                                                                                                                                                                                                                                                                                                                                                                                                      | 4                  |
| <b>Methods</b>            |        |                                                                                                                                                                                                                                                                                                                                                                                                                                                                        |                    |
| Study design              | 4      | Present key elements of study design early in the paper                                                                                                                                                                                                                                                                                                                                                                                                                | 4-5                |
| Setting                   | 5      | Describe the setting, locations, and relevant dates, including periods of recruitment, exposure, follow-up, and data collection                                                                                                                                                                                                                                                                                                                                        | 4-5                |
| Participants              | 6      | (a) <i>Cohort study</i> —Give the eligibility criteria, and the sources and methods of selection of participants. Describe methods of follow-up<br><i>Case-control study</i> —Give the eligibility criteria, and the sources and methods of case ascertainment and control selection. Give the rationale for the choice of cases and controls<br><i>Cross-sectional study</i> —Give the eligibility criteria, and the sources and methods of selection of participants | 5                  |
|                           |        | (b) <i>Cohort study</i> —For matched studies, give matching criteria and number of exposed and unexposed<br><i>Case-control study</i> —For matched studies, give matching criteria and the number of controls per case                                                                                                                                                                                                                                                 | n/a                |
| Variables                 | 7      | Clearly define all outcomes, exposures, predictors, potential confounders, and effect modifiers. Give diagnostic criteria, if applicable                                                                                                                                                                                                                                                                                                                               | 5                  |
| Data sources/ measurement | 8*     | For each variable of interest, give sources of data and details of methods of assessment (measurement). Describe comparability of assessment methods if there is more than one group                                                                                                                                                                                                                                                                                   | 4-5                |
| Bias                      | 9      | Describe any efforts to address potential sources of bias                                                                                                                                                                                                                                                                                                                                                                                                              | 6                  |
| Study size                | 10     | Explain how the study size was arrived at                                                                                                                                                                                                                                                                                                                                                                                                                              | 5                  |
| Quantitative variables    | 11     | Explain how quantitative variables were handled in the analyses. If applicable, describe which groupings were chosen and why                                                                                                                                                                                                                                                                                                                                           | 5-6                |
| Statistical methods       | 12     | (a) Describe all statistical methods, including those used to control for confounding                                                                                                                                                                                                                                                                                                                                                                                  | 6                  |
|                           |        | (b) Describe any methods used to examine subgroups and interactions                                                                                                                                                                                                                                                                                                                                                                                                    | n/a                |
|                           |        | (c) Explain how missing data were addressed                                                                                                                                                                                                                                                                                                                                                                                                                            | n/a                |
|                           |        | (d) <i>Cohort study</i> —If applicable, explain how loss to follow-up was addressed<br><i>Case-control study</i> —If applicable, explain how matching of cases and controls was addressed                                                                                                                                                                                                                                                                              |                    |

|                          |     |                                                                                                                                                                                                              |              |
|--------------------------|-----|--------------------------------------------------------------------------------------------------------------------------------------------------------------------------------------------------------------|--------------|
|                          |     | <i>Cross-sectional study</i> —If applicable, describe analytical methods taking account of sampling strategy                                                                                                 |              |
|                          |     | (e) Describe any sensitivity analyses                                                                                                                                                                        | 10           |
| <b>Results</b>           |     |                                                                                                                                                                                                              |              |
| Participants             | 13* | (a) Report numbers of individuals at each stage of study—eg numbers potentially eligible, examined for eligibility, confirmed eligible, included in the study, completing follow-up, and analysed            | 20           |
|                          |     | (b) Give reasons for non-participation at each stage                                                                                                                                                         | 20           |
|                          |     | (c) Consider use of a flow diagram                                                                                                                                                                           | 20           |
| Descriptive data         | 14* | (a) Give characteristics of study participants (eg demographic, clinical, social) and information on exposures and potential confounders                                                                     | 16           |
|                          |     | (b) Indicate number of participants with missing data for each variable of interest                                                                                                                          | 16           |
|                          |     | (c) <i>Cohort study</i> —Summarise follow-up time (eg, average and total amount)                                                                                                                             | n/a          |
| Outcome data             | 15* | <i>Cohort study</i> —Report numbers of outcome events or summary measures over time                                                                                                                          | n/a          |
|                          |     | <i>Case-control study</i> —Report numbers in each exposure category, or summary measures of exposure                                                                                                         | n/a          |
|                          |     | <i>Cross-sectional study</i> —Report numbers of outcome events or summary measures                                                                                                                           | 6, 16, 17-19 |
| Main results             | 16  | (a) Give unadjusted estimates and, if applicable, confounder-adjusted estimates and their precision (eg, 95% confidence interval). Make clear which confounders were adjusted for and why they were included | 17           |
|                          |     | (b) Report category boundaries when continuous variables were categorized                                                                                                                                    | 18-19        |
|                          |     | (c) If relevant, consider translating estimates of relative risk into absolute risk for a meaningful time period                                                                                             | n/a          |
| Other analyses           | 17  | Report other analyses done—eg analyses of subgroups and interactions, and sensitivity analyses                                                                                                               | 10           |
| <b>Discussion</b>        |     |                                                                                                                                                                                                              |              |
| Key results              | 18  | Summarise key results with reference to study objectives                                                                                                                                                     | 8            |
| Limitations              | 19  | Discuss limitations of the study, taking into account sources of potential bias or imprecision. Discuss both direction and magnitude of any potential bias                                                   | 10           |
| Interpretation           | 20  | Give a cautious overall interpretation of results considering objectives, limitations, multiplicity of analyses, results from similar studies, and other relevant evidence                                   | 9-10         |
| Generalisability         | 21  | Discuss the generalisability (external validity) of the study results                                                                                                                                        | 10           |
| <b>Other information</b> |     |                                                                                                                                                                                                              |              |
| Funding                  | 22  | Give the source of funding and the role of the funders for the present study and, if applicable, for the original study on which the present article is based                                                | 1            |

\*Give information separately for cases and controls in case-control studies and, if applicable, for exposed and unexposed groups in cohort and cross-sectional studies.

**Note:** An Explanation and Elaboration article discusses each checklist item and gives methodological background and published examples of transparent reporting. The STROBE checklist is best used in conjunction with this article (freely available on the Web sites of PLoS Medicine at <http://www.plosmedicine.org/>, Annals of Internal Medicine at <http://www.annals.org/>, and Epidemiology at <http://www.epidem.com/>). Information on the STROBE Initiative is available at [www.strobe-statement.org](http://www.strobe-statement.org).



# BMJ Open

## The evolving landscape of stroke prevention in atrial fibrillation within the United Kingdom between 2012 and 2016 - a cross sectional analysis study using CPRD

|                                 |                                                                                                                                                                                                                                                                                                                                                                                                                                                                                                                                                                           |
|---------------------------------|---------------------------------------------------------------------------------------------------------------------------------------------------------------------------------------------------------------------------------------------------------------------------------------------------------------------------------------------------------------------------------------------------------------------------------------------------------------------------------------------------------------------------------------------------------------------------|
| Journal:                        | <i>BMJ Open</i>                                                                                                                                                                                                                                                                                                                                                                                                                                                                                                                                                           |
| Manuscript ID                   | bmjopen-2016-015363.R2                                                                                                                                                                                                                                                                                                                                                                                                                                                                                                                                                    |
| Article Type:                   | Research                                                                                                                                                                                                                                                                                                                                                                                                                                                                                                                                                                  |
| Date Submitted by the Author:   | 24-May-2017                                                                                                                                                                                                                                                                                                                                                                                                                                                                                                                                                               |
| Complete List of Authors:       | Lacoin, Laure; Bristol-Myers Squibb<br>Lumley, Matthew; Pfizer<br>Ridha, Essra; Bristol-Myers Squibb<br>Pereira, Marta; Evidera<br>McDonald, Laura; Evidera,<br>Ramagopalan, Sreeram; Evidera<br>Lefèvre, Cinira; Bristol-Myers Squibb France, Worldwide Health Economics & Outcomes Research<br>Evans, David; Bristol-Myers Squibb France, Worldwide Health Economics & Outcomes Research<br>Halcox, Julian; Swansea University College of Medicine, Institute of Life Sciences; Cardiff University School of Medicine, Institute of Molecular and Experimental Medicine |
| <b>Primary Subject Heading</b>: | Cardiovascular medicine                                                                                                                                                                                                                                                                                                                                                                                                                                                                                                                                                   |
| Secondary Subject Heading:      | Epidemiology                                                                                                                                                                                                                                                                                                                                                                                                                                                                                                                                                              |
| Keywords:                       | Atrial fibrillation, Drug therapy, Electronic health records, Great Britain, Stroke < NEUROLOGY                                                                                                                                                                                                                                                                                                                                                                                                                                                                           |
|                                 |                                                                                                                                                                                                                                                                                                                                                                                                                                                                                                                                                                           |

SCHOLARONE™  
Manuscripts

1  
2  
3 **The evolving landscape of stroke prevention in atrial fibrillation within the United Kingdom**  
4 **between 2012 and 2016 – a cross sectional analysis study using CPRD**

5 L. Lacoïn,\*<sup>1</sup> M. Lumley,† E. Ridha,\* M. Pereira,‡<sup>1</sup> L. McDonald,‡ S. Ramagopalan,‡ C. Lefevre,§ D.  
6 Evans,<sup>1</sup> J. Halcox\*\*

7  
8 \* UK Medical Department, Bristol-Myers Squibb, Uxbridge, UK; † Medical Department, Pfizer,  
9 Tadworth, UK; ‡ Real-World Evidence, Evidera, London, UK; § Center of Observational Research and  
10 Data Sciences, Business Insights and Analytics, Bristol-Myers Squibb, Rueil Malmaison, France;  
11 WWHEOR Market, Bristol-Myers Squibb, Rueil Malmaison, France; \*\* Department of Cardiology,  
12 Swansea University, Cardiff UK

13  
14  
15 <sup>1</sup> Employee at time of the study

16  
17 **Correspondence to:** Professor Julian Halcox, Swansea University, Singleton Park Campus, Sketty,  
18 Swansea SA2 8PP, UK; tel 44 (0)1792 602938; [j.p.j.halcox@swansea.ac.uk](mailto:j.p.j.halcox@swansea.ac.uk)

19  
20 **Short title:** Evolving stroke prevention for NVAf in the UK

21  
22 **Word count:** 4000

23  
24 *"The Corresponding Author has the right to grant on behalf of all authors and does grant on behalf of*  
25 *all authors, [a worldwide licence](#) to the Publishers and its licensees in perpetuity, in all forms, formats*  
26 *and media (whether known now or created in the future), to i) publish, reproduce, distribute, display*  
27 *and store the Contribution, ii) translate the Contribution into other languages, create adaptations,*  
28 *reprints, include within collections and create summaries, extracts and/or, abstracts of the*  
29 *Contribution, iii) create any other derivative work(s) based on the Contribution, iv) to exploit all*  
30 *subsidiary rights in the Contribution, v) the inclusion of electronic links from the Contribution to third*  
31 *party material where-ever it may be located; and, vi) licence any third party to do any or all of the*  
32 *above."*

33  
34 **DISCLOSURE STATEMENTS**

35 All authors have completed the ICMJE uniform disclosure form. This study was funded by Bristol-  
36 Myers Squibb and Pfizer. Marta Pereira and Sreeram Ramagopalan were employees of Evidera who  
37 were paid consultants to Bristol-Myers Squibb and Pfizer in connection with conducting this study  
38 and with the development of this manuscript. DE, ER, and LL were BMS employees at the time of the  
39 research.  
40  
41  
42  
43  
44  
45  
46  
47  
48  
49  
50  
51  
52  
53  
54  
55  
56  
57  
58  
59  
60

## ABSTRACT

**Objective:** To describe the changes in prescribing of oral anticoagulant (AC) and antiplatelet (AP) agents in patients with non-valvular atrial fibrillation (NVAf) in the UK and to identify the characteristics associated with deviation from guideline-based recommendations.

**Design:** Five cross-sectional analyses in a large retrospective population-based cohort study.

**Setting:** General practices contributing data to the UK Clinical Practice Research Datalink.

**Participants:** The study included patients with a diagnosis of non-valvular atrial fibrillation (NVAf) and eligible for anticoagulation (CHA2DS2-VASc score  $\geq 2$ ) on 1st April of 2012, 2013, 2014, 2015 and 1st January 2016.

**Results:** The proportion of patients being treated with AC increased at each index date, showing an absolute rise of 16.7% over the study period. At the same time, the proportion of patients treated with an AP alone was reduced by half, showing an absolute decrease of 16.8%. The proportion of patients not receiving any antithrombotic (AT) treatment remained the same across the study period. A number of predictors were identified for AP alone or no treatment compared with AC treatment.

**Conclusion:** Major improvements in the AT management of patients with NVAf for stroke prevention in the UK were observed between April 2012 and January 2016. Despite this, nearly 20% of at-risk patients still received AP alone and over 15% were on no AT agents in January 2016.

## STRENGTHS AND LIMITATIONS

- A large representative population of patients with all forms of AF (paroxysmal, chronic) studied in the 'real-world' using data obtained from GP records in Clinical Research Practice Datalink (CPRD)
- Real-world data are more likely to reflect wider contemporary treatment practices than information obtained from registries
- Although CPRD is regularly and extensively audited to ensure data quality, the study is limited by the accuracy of GP records
- The completeness of the GP record is difficult to ascertain, and we may have not detected some individuals receiving AC prescriptions is secondary care

**Key words:** Atrial Fibrillation, Drug Therapy, Electronic Health Records, Great Britain, Stroke

## INTRODUCTION

Atrial fibrillation (AF) is the most common cardiac arrhythmia,[1] estimated to affect up to 35 million people worldwide,[2] with 1.4 million people affected in England alone.[3] AF is an independent risk factor for stroke, increasing the risk five-fold.[4]

Approximately 20% of stroke cases in the United Kingdom (UK) are thought to have AF as a contributing factor and AF-related strokes are more likely to be fatal or cause severe disability than non-AF-related strokes.[5, 6] However, AF-related strokes can be prevented and their impact minimised by effective management strategies including increased detection of AF, adherence to stroke prevention guidelines and anticoagulant (AC) use in at-risk patients.

Although anticoagulation is effective in preventing strokes due to AF, evidence suggests anticoagulation therapy remains underused.[7-13] In 2010, Holt et al. showed that only 50.7% of patients with non-valvular AF (NVAf) at high risk of stroke in the UK were treated with oral AC.[9] Opportunities to impact significantly on an important cause of cardiovascular morbidity and mortality are thereby frequently missed.

In 2012, a focused update of the 2010 European Society of Cardiology (ESC) guidelines for the management of AF was issued.[14] This update included three major changes based on new or strengthened evidence. Firstly, the CHA2DS2-VASc score replaced the CHADS2 score for the assessment of stroke risk. This is based on the accumulated evidence that CHA2DS2-VASc score, which is inclusive of the most common risk factors for stroke[15] and has been validated in multiple cohorts,[16] is better at identifying patients at “truly low risk” of AF-related stroke.[17-20] Secondly, the use of aspirin therapy for stroke prevention in AF was restricted to those patients who refuse oral anticoagulation. Thirdly, the use of non-vitamin K antagonist oral anticoagulants [(NOACs), such as dabigatran, apixaban, and rivaroxaban]) was recommended in preference to vitamin K antagonists (VKAs) in most patients with a CHA2DS2-VASc score  $\geq 1$ . [14]

1  
2  
3 Despite these guidelines and the weight of evidence, national audit data from the UK showed that  
4  
5 among patients with known AF admitted to hospital for stroke between January and March 2013,  
6  
7 38% were taking antiplatelet (AP) drugs alone.[21]  
8  
9

10 In 2014, when the National Institute for Health and Care Excellence (NICE) updated its AF clinical  
11  
12 guidelines (CG180),[22] it recommended that NOACs should be considered as equal first-line options  
13  
14 alongside warfarin for NVAF; furthermore in a significant change to established practice stated that  
15  
16 aspirin should not be used as monotherapy to prevent AF-related stroke. The Royal Colleges  
17  
18 published a Consensus Statement reiterating this advice and emphasising the importance of  
19  
20 ensuring patients are supported to make an informed choice of AC.[23]  
21  
22

23  
24 It is not yet known whether the update of the ESC and NICE guidelines effectively impacted  
25  
26 treatment practices in the UK. Therefore, this study aims to describe the changes in primary care  
27  
28 prescribing of oral AC and AP agents in patients with NVAF eligible for anticoagulation during the  
29  
30 years 2012–2016, and to identify clinical characteristics associated with deviation from guideline-  
31  
32 based recommendations.  
33  
34

## 35 **METHODS**

### 36 **Data Source**

37  
38 Data were obtained from the UK Clinical Practice Research Datalink (CPRD).[24] The CPRD is an  
39  
40 anonymised primary care database established in 1987 to collect longitudinal medical records data  
41  
42 from general practitioner (GP) practices. As of April 2013, the CPRD covered 674 GP practices with  
43  
44 4.4 million active patients (i.e., patients that are alive and registered), reflecting approximately 6.8%  
45  
46 of the UK population. This active sample is representative of the UK population in terms of age, sex,  
47  
48 and ethnicity. The CPRD contains patient registration information as well as events that the GP  
49  
50 records during routine clinical practice, including medical diagnoses, prescriptions issued,  
51  
52  
53  
54  
55  
56  
57  
58  
59  
60

1  
2  
3 anthropometric measurements, diagnostic tests, lifestyle information (e.g., smoking status, alcohol  
4 intake) and referrals to secondary care.  
5  
6

7  
8 The CPRD has broad National Research Ethics Service Committee (NRES) ethics approval for purely  
9 observational research. This study protocol was approved by the MHRA Independent Scientific  
10 Advisory Committee (protocol 14\_245R).  
11  
12  
13

### 14 **Study Population**

15  
16 All patients with a diagnosis of NVAf and eligible for anticoagulation according to ESC 2012[14] and  
17 NICE 2014[22] guidance at index date (CHA2DS2-VASc score  $\geq 2$ ) were included in five cross-sectional  
18 analyses: on 1<sup>st</sup> April of 2012, 2013, 2014, and 2015 and 1<sup>st</sup> January of 2016 (index date for each  
19 year). Patients were further required to be at least 18 years old at the index date, have had at least  
20 one consultation with their GP in the last 12 months, have ongoing CPRD registration, and have at  
21 least 12 months of computerised medical data prior to the index date. Patients were excluded from  
22 the study if they had a valvular condition (e.g., rheumatic mitral or aortic valve disease, or prosthetic  
23 valve; codes used to identify patients are in the data supplement), or if their gender was unknown.  
24  
25 Figure 1 summarises the patient selection process.  
26  
27  
28  
29  
30  
31  
32  
33  
34  
35  
36  
37

### 38 **Study Variables**

39  
40 Exposure to AC was defined by the last anticoagulation prescription identified in the 90-day period  
41 preceding the index date. Three type of regimens were defined: AC, AP alone, or no antithrombotic  
42 (AT) treatment. AC included vitamin K antagonists, apixaban, rivaroxaban, dabigatran, and  
43 parenteral AC. International normalised ratio (INR) measurements were treated as an indicator of  
44 VKA exposure and was therefore used to extend VKA exposure time. Exposure to AP alone was  
45 defined by an absence of AC prescription and the presence of at least one AP prescription in the 90-  
46 day period preceding the index date. No AT was defined by the absence of AC or AP prescription in  
47  
48  
49  
50  
51  
52  
53  
54  
55  
56  
57  
58  
59  
60

1  
2  
3 the 90-day period preceding the index data. A 90-day period has been used in previous studies to identify  
4 recent treatment exposure.[25]  
5  
6

7  
8 Demographic characteristics included age, gender, and country of residence. Clinical characteristics  
9  
10 were body mass index (BMI), smoking status, time since NVAf diagnosis, stroke risk factors (previous  
11 stroke, transient ischaemic attack [TIA] or other arterial thromboembolism, congestive heart failure  
12 (CHF), coronary artery disease, peripheral artery disease, hypertension, or diabetes mellitus), other  
13 bleeding risk factors (previous bleeds, peptic ulcer, renal disease, liver disease, concomitant  
14 treatment with antiplatelet or nonsteroidal anti-inflammatory drugs, or high alcohol intake), falls,  
15 active cancer (at least one diagnosis related to cancer in the last 12 months) and number of  
16 concomitant treatments (prescribed in the last 90 days). CHA<sub>2</sub>DS<sub>2</sub>-VASc score and a modified HAS-  
17 BLED score (excluding INR component as not consistently reported in CPRD, score range: 0-8) were  
18 calculated for all patients. All clinical diagnoses were identified using READ codes (codes lists  
19 provided in the data supplement). Diabetes and hypertension were also identified using the  
20 prescription of antidiabetic or antihypertensive treatments.  
21  
22  
23  
24  
25  
26  
27  
28  
29  
30  
31  
32

### 33 34 **Statistical Analyses**

35  
36  
37 The proportion of patients treated with each regimen (AC, AP alone, or no AT) and their 95%  
38 confidence interval were calculated at each index date. As the CPRD does not provide sample survey  
39 weights, it is only possible to estimate proportions as if the CPRD data is a simple random sample of  
40 approximately 8% of UK GPs/patients, so a finite population correction factor of 0.96 was applied to  
41 the standard errors of proportion estimates (FPFC =  $\sqrt{1-0.08}$  ~0.96).  
42  
43  
44  
45  
46  
47

48  
49 An interrupted time series analysis [26] was conducted to estimate the impact of the updated ESC  
50 guidance (published in August 2012) and NICE 2014 guidance (published in June 2014) on the  
51 evolution of the proportion of patients treated with each regimen, controlling for baseline level and  
52 trend. For this analysis, data from April 2011 to April 2015 were used and month-by-month  
53 estimates were extracted to obtain 50 time-points (using the same inclusion criteria than for the five  
54  
55  
56  
57  
58  
59  
60

1  
2  
3 main cross-sectional analyses). The time series model was divided into three time periods: (1) pre-  
4 ESC guidelines, (2) post-ESC guidelines, and (3) post-NICE guidelines. The statistical significance of  
5 the change in level (i.e., the rapid drop in rates immediately after the intervention) and trend (i.e.,  
6 the gradual decline in rates over the remainder of the follow-up period) were tested for each time  
7 period. The slope in each time period was calculated by summing the change in trend observed in  
8 the time period and the previous slope (in first period (pre-ESC), the baseline trend was equal to the  
9 slope).

10  
11  
12  
13  
14  
15  
16  
17  
18  
19 These analyses of the evolution of the anticoagulation management over time were also run  
20 separately in newly diagnosed patients with NVAf (<12 months) and in patients with NVAf with a  
21 diagnosis for  $\geq 12$  months, as well as in each country of residence separately (England, Scotland,  
22 Wales, and Northern Ireland; results by country provided in the data supplement).

23  
24  
25  
26  
27  
28 Generalised estimating equations (GEE) were used to identify demographic and clinical  
29 characteristics associated with antiplatelet treatment, and with the absence of AT treatment (versus  
30 receiving anticoagulation therapy) in April 2015 (date of the last planned cross-sectional analysis).  
31  
32  
33  
34  
35  
36  
37  
38  
39  
40  
41  
42  
43  
44  
45  
46  
47  
48  
49  
50  
51  
52  
53  
54  
55  
56  
57  
58  
59  
60  
The final models were obtained using a backward elimination until all variables were significantly  
associated with the outcome ( $P < 0.05$ ). Models were adjusted for clustering within individuals and  
within GP practices, and results are given as odds ratios and 95% confidence intervals.

### **Sensitivity Analyses**

To evaluate the proportion of patients that could have been misclassified as untreated, a sensitivity  
analysis was conducted, extending the exposure window used to classify patients to 180 days prior  
to index date. To assess the possible impact of GP sample modification, a second sensitivity analysis  
limiting the study sample to only those patients who were registered to a GP practice included in the  
CPRD throughout the study period.

]All analyses were conducted using SAS software version 9.4.



## RESULTS

### Patient Characteristics

The demographic and clinical characteristics of patients with NVAf eligible for anticoagulation according to ESC and NICE guidance (CHA<sub>2</sub>DS<sub>2</sub>-VASc  $\geq 2$ ) from April 2012 to January 2016 are provided in Table 1. The characteristics of the population were consistent across the study period: patients' mean age was 78 years, 52.4%–54.3% were male, and more than 50% were either overweight or obese. Almost 20% had a history of stroke or TIA, around 30% had a history of coronary artery disease and most had hypertension (>97%). Approximately 12% had been diagnosed with NVAf within the preceding 12 months (newly diagnosed).

### Treatment Patterns Over Time

The proportion of patients being treated with AC increased each year, showing an absolute rise of 16.7% over the study period (from 50.2% in April 2012 to 66.9% in January 2016) (Table 2). At the same time, the proportion of patients treated with an AP alone was reduced by half, showing an absolute decrease of 16.8% (from 34.2% in April 2012 to 17.4% January 2016). The proportion of patients not receiving any AT treatment remained the same across the study period, at around 15% of all patients with NVAf.

Stratifying the population by time since diagnosis identified the reduction in the proportion of patients treated with AP alone was greater in newly diagnosed patients, relative to those who had been diagnosed for  $\geq 12$  months (26.8% vs. 15.4%). In January 2016, only 11.3% of the newly diagnosed patients were treated with AP alone (vs 18.3% of those diagnosed  $\geq 12$  months). Similarly, the increase in the proportion of patients being prescribed AC was greater in those patients who were newly diagnosed compared to those diagnosed with NVAf for  $\geq 12$  months (25.3% vs. 15.5%). In January 2016, 72.5% of the newly diagnosed patients were treated with AC (vs. 66.1% of those diagnosed for  $\geq 12$  months).

1  
2  
3 In newly diagnosed patients, major changes in the type of oral AC prescribed were observed  
4  
5 between April 2014 and January 2016. The proportion of patients initiated with VKA fell from 50.8%  
6  
7 to 31.8% of all patients with NVAf, while the NOAC prescriptions rose from 9.8% to 40.6% (including  
8  
9 16.6% apixaban, 2.4% dabigatran, 21.5% rivaroxaban). No major change was observed in the NVAf  
10  
11 population with a diagnosis for  $\geq 12$  months; VKA prescribed in 50.9% of the population in January  
12  
13 2016 and NOACs in 15% (including 4.5% apixaban, 2.2% dabigatran, 8.3% rivaroxaban).

14  
15  
16  
17 A sensitivity analysis using a time period of 180 days prior to index date was used to evaluate the  
18  
19 proportion of patients that could have been misclassified as untreated. This analysis provided the  
20  
21 same results, with only 2% difference in the proportion of untreated patients observed. Results  
22  
23 were also unchanged when restricting only to those patients who were registered to a GP included  
24  
25 in the CPRD throughout the study period.  
26  
27

#### 28 **Impact of ESC and NICE Guidelines Publications on UK Practice**

29  
30  
31 The time series analysis stratified by time since NVAf diagnosis ( $< 12$  months or  $\geq 12$  months)  
32  
33 showed that there was a significant trend for increasing anticoagulation treatment in both patient  
34  
35 groups since April 2011 (Figure 3). However, a significant acceleration of this trend (increase of the  
36  
37 slope) was observed after the updated ESC guidance publication (change in trend:  $\beta=+0.26$  in newly  
38  
39 diagnosed,  $\beta=+0.18$  in patients diagnosed  $\geq 12$  months) and also after NICE guidance publication  
40  
41 (change in trend:  $\beta=+0.12$  in newly diagnosed,  $\beta=+0.15$  in patients diagnosed  $\geq 12$  months).  
42  
43

44  
45 Equally, a significant trend for decreasing antiplatelet use was observed since April 2011. A  
46  
47 significant acceleration of this trend was observed after both ESC and NICE guidance publications.  
48  
49 This change in trend was more marked after ESC for the newly diagnosed patients (post ESC:  $\beta=-$   
50  
51 0.26, post-NICE:  $\beta=-0.10$ ) and after NICE for patients diagnosed  $\geq 12$  months (post-ESC:  $\beta=-0.15$ ,  
52  
53 post-NICE:  $\beta=-0.21$ ).  
54  
55

#### 56 **Characteristics Associated with the Absence of Anticoagulation Therapy in April 2015**

1  
2  
3 Tables 3 and 4 present the results of the GEE models comparing demographic and clinical  
4 characteristics in patients receiving either an AP alone or no AT, versus those receiving AC treatment  
5 in April 2015. Even after adjusting on CHA2DS2-VASc score, females, patients aged <65 and ≥85 (vs.  
6 patients 65-74 years) were more likely to be prescribed an AP alone or no AT treatment, whereas  
7 patients with a history of stroke/TIA, CHF or hypertension were less likely to remain untreated. The  
8 likelihood of being treated with AP alone increased with time since diagnosis. Patients with coronary  
9 and peripheral artery disease were also more likely to be treated with an AP alone than AC.  
10 Importantly, CHA2DS2-VASc was associated with the absence of AT treatment, patients with a score  
11 ≥3 were less likely to remain untreated than patients with a CHA2DS2-VASc score=2. To less extent,  
12 the same association was observed in patients treated with AP alone (vs. AC). Patients who had a  
13 previous intracranial bleed were more likely to be treated with AP and even more likely to remain  
14 untreated. The absence of any AT was more frequent in patients with less than five  
15 comedications. Geographic variations were observed, with a higher proportion receiving AP alone or  
16 no AT in England and Scotland compared to Wales and Northern Ireland.  
17  
18  
19  
20  
21  
22  
23  
24  
25  
26  
27  
28  
29  
30  
31  
32

### 33 **DISCUSSION**

34  
35  
36  
37 A pronounced shift in anticoagulation management of patients with NVAF was observed in the UK  
38 between April 2012 and January 2016, coinciding with the update of ESC[14] and NICE[22] guidelines  
39 and with the availability of the NOACs as an alternative to VKAs. A substantial increase in the  
40 proportion of patients with NVAF at risk of stroke treated with AC was observed during this time  
41 (from 50.2% to 66.9%), as well as an important decrease of AP use (34.2% to 17.4%).  
42  
43  
44  
45  
46  
47

48 Whereas important increases in the proportion of patients with NVAF treated with AC were  
49 previously described in the UK between 1994-2003,[7, 8] no significant changes were observed in  
50 the years 2007–2010 in patients with CHA2DS2-VASc ≥2, with AC use remaining low (around 50%)  
51 and AP alone widely used (36%). The high use of AP until March 2012 may have also partly reflected  
52 the recommendations of the Quality and Outcomes Framework (QOF) of the NHS (National Health  
53  
54  
55  
56  
57  
58  
59  
60

1  
2  
3 Service), which provided equal emphasis on AC and AP in stroke prevention in primary care at that  
4  
5 time.[13]  
6  
7

8 The observed shift in treatment patterns in this study suggests a positive impact of both the ESC [14]  
9  
10 and NICE[22] guidelines in driving changes in thrombopropylaxis strategy for NVAF patients in the  
11  
12 UK, most notably the move away from AP use. The release of the ESC guidance appeared to impact  
13  
14 more significantly the management of recently diagnosed patients. This may reflect an earlier  
15  
16 change in the practice of cardiologists who, in the UK, are typically more involved in the diagnosis  
17  
18 and initial management of NVAF. Indeed, the publication of the NICE guidance had a greater impact  
19  
20 on the decline in AP use among patients with a pre-existing diagnosis, which might reflect the higher  
21  
22 impact of local guidance on GP's who are more involved in the long-term management of patients.  
23  
24

25  
26 Overall, the most marked improvement in stroke prevention in AF occurred in newly diagnosed  
27  
28 patients, in whom AC prescriptions rose from 47.2% to 72.5% and the use of AP alone dropped to  
29  
30 11.3% in January 2016. At the time of diagnosis, patients are likely to be particularly engaged with  
31  
32 their condition, more likely to be booked for further clinical assessment and physicians are obligated  
33  
34 to make a decision regarding AC. Conversely, patients with a longstanding diagnosis may be more  
35  
36 resistant to changes in their treatment regimen, and thromboembolism prophylaxis may not be the  
37  
38 focus of clinical appointments. As newly diagnosed patients represent only 20% of the NVAF  
39  
40 population, this emphasises the potential impact on stroke prevention in the UK that could be  
41  
42 achieved by effectively addressing thromboembolism prophylaxis strategy in patients with an  
43  
44 established NVAF diagnosis. Ongoing educational activity and the use of specialist nurses and  
45  
46 pharmacist led anticoagulation clinics will play an important role in reaching this group of patients.  
47  
48  
49

50 Importantly, the trend for increasing use of AC between 2012 and 2016 was associated with the  
51  
52 growing use of NOAC's (apixaban, rivaroxaban, dabigatran). This growth of NOAC use was mainly  
53  
54 observed in newly diagnosed patients between 2014 and 2016, associated with a decrease of VKA  
55  
56 initiation, and coincided with the release of NICE guidance[22] and the Consensus Statement  
57  
58  
59  
60

1  
2  
3 reiterating that NICE-approved treatments have to be made available for prescribing. This highlights  
4  
5 the vital role of the NOACs as alternatives to VKA through addressing some of the limitations of VKA  
6  
7 therapy and responding to individual patient needs. However, in patients who had been diagnosed  
8  
9 for  $\geq 12$  months, no major changes in the proportion treated with VKA were observed, indicating  
10  
11 significant VKA inertia in this group.  
12

13  
14 This growing trend in the use of NOAC's in newly diagnosed AF patients can be linked to a growing  
15  
16 awareness raised through NICE guidance about the benefits of NOAC treatment but also to an  
17  
18 increased attentiveness to AF detection. Currently, only opportunistic screening for AF is  
19  
20 implemented: - NICE recommends an ECG to diagnose AF in patients who present with irregular  
21  
22 pulse[22], An expansion in AF screening, would potentially result in the earlier detection of AF in  
23  
24 asymptomatic patients, and thus the early provision of prophylactic OAC treatment.  
25  
26

27  
28 Although these data show that anticoagulation treatment patterns in NVAf have improved  
29  
30 substantially over the last five years, rates of anticoagulation appear to lag behind those observed in  
31  
32 contemporary European cohorts. For example, at the two-year follow up of the EORP-AF registry in  
33  
34 2015, 79.2% of AF patients were identified as receiving at least one oral AC (compared to 62.9% in  
35  
36 2015 in this study, Table 2).[27] Rates of NOAC use however appear more comparable, with 13.7% of  
37  
38 patients in EORP-AF receiving at least one NOAC (compared to 10.9% in this study in 2015). Baseline  
39  
40 data from the European population of the GLORIA-AF registry, which includes only newly diagnosed  
41  
42 AF patients, showed the majority (52.4%) were treated with NOACs, while 5.7 % received AP  
43  
44 therapy, and only 4.1% remained untreated.[28] These data are comparable to the 9.8% receiving  
45  
46 NOACs, 23.8% AP therapy, and 15.2% untreated among patients diagnosed between 2013 and 2014  
47  
48 in our study (Figure 2). Similarly, in the global GARFIELD-AF registry of patients with very recently  
49  
50 diagnosed NVAf (<6 weeks), over the period from 2010/11 to 2014/15 the proportion of patients  
51  
52 treated with AC increased from 57.4% to 71.1% including a significant increase in the proportion  
53  
54 receiving NOACs (4.2%–37.0%), whilst AP monotherapy declined from 30.2% to 16.6%.[29] It is  
55  
56  
57  
58  
59  
60

1  
2  
3 encouraging that our data up to January 2016 continue to show anticoagulation use is increasing in  
4  
5 the UK. Differences with European-based cohorts may, therefore, reflect a time lag associated with  
6  
7 the later release of NICE guidance in 2014[22] relative to the ESC guidance in 2012.[14] Other factors  
8  
9 may also be involved. The time lag between guideline recommendation and routine clinical practice  
10  
11 should be considered with the release of newer ESC guidance in 2016.[30]  
12

13  
14 Whereas the striking decrease of AP use observed in this study is encouraging, the absence of any  
15  
16 changes in the proportion of patients remaining untreated raises some concerns. These current data  
17  
18 identify patient characteristics associated with remaining untreated. Younger patients (<65 years),  
19  
20 patients taking fewer prescription medications (<5), and those with a CHA2DS2-VASc score of 2 were  
21  
22 all more likely to remain untreated. We hypothesise that this could be secondary to a misperception  
23  
24 of stroke risk by clinicians but it may also be secondary to patient attitude. Furthermore for those  
25  
26 patients <65 years of age, the monitoring requirements of VKAs may be regarded as incompatible  
27  
28 with a working life; a barrier that could be overcome with the NOACs.  
29

30  
31  
32 At the other end of the spectrum, elderly patients (>85 years) were found to be less likely to be  
33  
34 prescribed AC therapy and more likely to be treated with AP alone. This observation is well  
35  
36 documented[8, 12, 13, 31-35] and may be secondary to an overestimation of bleeding risk despite  
37  
38 unequivocal evidence of the benefits of AC in the elderly.[36-39]  
39

40  
41  
42 Our findings clearly illustrate the risk-treatment paradox previously reported in AF management [12]  
43  
44 that patients at higher risk of stroke who more likely to benefit from AC therapy [38] are not  
45  
46 receiving appropriate treatment, perhaps because of a perceived increased risk of bleeding. In fact,  
47  
48 several bleeding risk factors such as falls, peptic ulcer disease, anaemia, and previous risk of  
49  
50 intracranial or gastrointestinal bleeds were found to also be associated with an increasing likelihood  
51  
52 of remaining untreated. A survey of UK general practices from 2000 to 2009 showed that this  
53  
54 underuse of AC therapy in the elderly is not adequately explained by either an increase in  
55  
56 comorbidities or bleeding risk.[40]  
57  
58  
59  
60

1  
2  
3 In addition to age, female patients were found less likely to be treated with AC. This sex difference in  
4 prescribing has been previously observed in a UK study in AF.[8] Given that women with AF appear  
5 to lose their protection against sudden death including stroke,[41] and may even have a higher  
6 mortality than men,[42] these lower AC rates are a cause for concern. AP alone was found to be  
7 prescribed more frequently in patients with coronary artery disease. This may highlight the lack of a  
8 definitive evidence base and clear guidance on the AT management of these patients, particularly in  
9 the initial period following an acute coronary syndrome.  
10  
11  
12  
13  
14  
15  
16  
17

18 Collectively, the results indicate a strong mandate to change current clinical practice to improve  
19 prescribing patterns among treating clinicians. This is further emphasised by the 2016 ESC  
20 guidelines, which state that aspirin monotherapy should not be used for stroke prevention in AF  
21 patients regardless of stroke risk, and may in fact cause harm [30] Although the present study was  
22 conducted in the UK, the finding that a considerable number of AF patients continue to be  
23 undertreated has wider implications for stroke prevention in AF, which remains a global issue.  
24  
25  
26  
27  
28  
29  
30  
31

### 32 **STRENGTHS AND LIMITATIONS**

33  
34  
35 This is a large study of a representative population of NVAf patients managed in the UK. It includes  
36 patients with all forms of AF, including paroxysmal and chronic. The study may have not detected  
37 some individuals receiving AC prescriptions in secondary care. The National Patient Safety Agency  
38 has emphasised the importance of good communication between different bodies sharing  
39 responsibility for prescribing potentially interacting medication, and this has increased the use of  
40 codes in primary care to maintain awareness of AC therapy prescribed elsewhere.[9, 43].  
41  
42  
43  
44  
45  
46  
47  
48

49 This study is based on a general practice database, and is limited by the accuracy of GP records.  
50 Validation of the CPRD has shown high positive predictive value of some diagnoses and, where  
51 evaluated, comparisons of incidence with other UK data sources are also broadly similar.[44]  
52  
53 However, the completeness of the record is more difficult to ascertain. We acknowledge that the  
54 results reported in this study may under-represent comorbidities and, hence, overall stroke risk.  
55  
56  
57  
58  
59  
60

1  
2  
3 It is important to note that due to the falling number of GP practices involved in the CRPD, the  
4 number of eligible patients with NVAF also fell during the study period. However, a sensitivity  
5 analysis was conducted on the NVAF population who were registered to a GP practice included in  
6 the CPRD throughout the study period, and the results were unchanged. Therefore, the observed  
7 change in AT management cannot be attributed to the reduction in available GP data.  
8  
9  
10  
11  
12

13  
14 It is important to reflect on the differences in the nature of data collection and analysis between  
15 registry and real world healthcare records, whereby participation in a registry may influence  
16 treatment selection but allow more complete and accurate data collection, whereas real world  
17 datasets allow analysis of much larger cohorts that are more likely to reflect wider contemporary  
18 practice, albeit with less complete and well-validated data.  
19  
20  
21  
22  
23  
24

## 25 26 **CONCLUSION**

27  
28 Major improvements in the AC management of patients with NVAF for stroke prevention in the UK  
29 were observed between April 2012 and January 2016. Despite this, 20% of the at-risk population  
30 were still treated with AP alone and more than 15% of patients were on no AT agents in January  
31 2016. However, if the trend of rapid reduction of AP use observed during the study period continues,  
32 then the use of AP alone for stroke prevention could essentially disappear in the next few years in  
33 the UK. The consistency observed over time in the proportion of patients not treated with any AT  
34 therapy represents the area of greatest concern. The clinical inertia seen in this group may be due to  
35 an underestimate of the risk of stroke in these patients, who were found to be younger with less  
36 comorbidities and the overestimation of bleeding risk in the elderly (>85 years). There remains a  
37 huge potential for reducing the stroke risk of the AF population by improving the thromboembolic  
38 risk assessment in NVAF in primary care and the identification of patients requiring anticoagulation.  
39  
40  
41  
42  
43  
44  
45  
46  
47  
48  
49  
50  
51  
52  
53  
54  
55  
56  
57  
58  
59  
60



**AUTHORSHIP DETAILS**

L. Lacoïn, C. Lefevre, D. Evans and J. Halcox conceived and designed the study. L. McDonald, M. Pereira and S. Ramagopalan undertook the analysis. All authors (LL, ML, ER, MP, LM, SR, CL, DE and JH) contributed to the analysis and interpretation of the data. L. McDonald and L Lacoïn wrote the first draft and all authors contributed to subsequent drafts and the final paper.

**ACKNOWLEDGMENTS**

The authors would like to gratefully acknowledge the contribution of Sharon McLachlan, Robert Donaldson and Jack Ishak who all provided expert opinion during the data analysis.

**COMPETING INTERESTS**

All authors have completed the ICMJE uniform disclosure form. MP, LM and SR were employees of Evidera who were paid consultants to Bristol-Myers Squibb (BMS) in connection with conducting this study and with the development of this manuscript. JH received consultancy fees from BMS for the conduct of this study. DE, ER, CL and LL were BMS employees at the time of the research. ML is a fulltime employee of Pfizer.

**FUNDING**

This manuscript was fully funded by Bristol-Myers Squibb.

**DATA SHARING STATEMENT**

No additional data is available for sharing.

## REFERENCES

1. Go AS, Hylek EM, Phillips KA, Chang Y, Henault LE, Selby JV, Singer DE. Prevalence of diagnosed atrial fibrillation in adults: national implications for rhythm management and stroke prevention: the AnTicoagulation and Risk Factors in Atrial Fibrillation (ATRIA) Study. *JAMA* 2001; 285: 2370-2375.
2. Chugh SS, Havmoeller R, Narayanan K, Singh D, Rienstra M, Benjamin EJ, Gillum RF, Kim YH, McAnulty JH, Jr., Zheng ZJ, Forouzanfar MH, Naghavi M, Mensah GA, Ezzati M, Murray CJ. Worldwide epidemiology of atrial fibrillation: a Global Burden of Disease 2010 Study. *Circulation* 2014; 129: 837-847.
3. Public Health England. Atrial fibrillation prevalence estimates in England: application of recent population estimates of AF in Sweden 2015 [December 2015]. Available from: <http://www.yhpho.org.uk//resource/view.aspx?RID=207902>
4. Kirchhof P, Auricchio A, Bax J, Crijns H, Camm J, Diener HC, Goette A, Hindricks G, Hohnloser S, Kappenberger L, Kuck KH, Lip GY, Olsson B, Meinertz T, Priori S, Ravens U, Steinbeck G, Svernhage E, Tijssen J, Vincent A, et al. Outcome parameters for trials in atrial fibrillation: executive summary. *Eur Heart J* 2007; 28: 2803-2817.
5. Royal College of Physicians. Sentinel Stroke National Audit Programme (SSNAP). Clinical audit April - June 2015 report prepared by Royal College of Physicians, Clinical Effectiveness and Evaluation Unit on behalf of the Intercollegiate Stroke Working Party. 2015.
6. Lin HJ, Wolf PA, Kelly-Hayes M, Beiser AS, Kase CS, Benjamin EJ, D'Agostino RB. Stroke severity in atrial fibrillation. The Framingham Study. *Stroke* 1996; 27: 1760-1764.
7. Majeed A, Moser K, Carroll K. Trends in the prevalence and management of atrial fibrillation in general practice in England and Wales, 1994-1998: analysis of data from the general practice research database. *Heart* 2001; 86: 284-288.

- 1  
2  
3 8. DeWilde S, Carey IM, Emmas C, Richards N, Cook DG. Trends in the prevalence of diagnosed  
4 atrial fibrillation, its treatment with anticoagulation and predictors of such treatment in UK  
5 primary care. *Heart* 2006; 92: 1064-1070.  
6  
7
- 8  
9  
10 9. Holt TA, Hunter TD, Gunnarsson C, Khan N, Cload P, Lip GY. Risk of stroke and oral  
11 anticoagulant use in atrial fibrillation: a cross-sectional survey. *Br J Gen Pract* 2012; 62: e710-  
12 717.  
13
- 14  
15  
16 10. Ogilvie IM, Newton N, Welner SA, Cowell W, Lip GY. Underuse of oral anticoagulants in atrial  
17 fibrillation: a systematic review. *Am J Med* 2010; 123: 638-645 e634.  
18
- 19  
20  
21 11. Nieuwlaat R, Capucci A, Lip GY, Olsson SB, Prins MH, Nieman FH, Lopez-Sendon J, Vardas PE,  
22 Aliot E, Santini M, Crijns HJ, Euro Heart Survey I. Antithrombotic treatment in real-life atrial  
23 fibrillation patients: a report from the Euro Heart Survey on Atrial Fibrillation. *Eur Heart J*  
24 2006; 27: 3018-3026.  
25  
26
- 27  
28  
29 12. Sandhu RK, Bakal JA, Ezekowitz JA, McAlister FA. Risk stratification schemes, anticoagulation  
30 use and outcomes: the risk--treatment paradox in patients with newly diagnosed non-valvular  
31 atrial fibrillation. *Heart* 2011; 97: 2046-2050.  
32  
33
- 34  
35  
36 13. Cowan C, Healicon R, Robson I, Long WR, Barrett J, Fay M, Tyndall K, Gale CP. The use of  
37 anticoagulants in the management of atrial fibrillation among general practices in England.  
38 *Heart* 2013; 99: 1166-1172.  
39  
40
- 41  
42  
43 14. Camm AJ, Lip GY, De Caterina R, Savelieva I, Atar D, Hohnloser SH, Hindricks G, Kirchhof P, ESC  
44 Committee for Practice Guidelines-CPG. 2012 focused update of the ESC Guidelines for the  
45 management of atrial fibrillation: an update of the 2010 ESC Guidelines for the management  
46 of atrial fibrillation--developed with the special contribution of the European Heart Rhythm  
47 Association. *Europace* 2012; 14: 1385-1413.  
48  
49  
50  
51  
52  
53  
54  
55  
56  
57  
58  
59  
60

- 1  
2  
3 15. Lip GY, Nieuwlaat R, Pisters R, Lane DA, Crijns HJ. Refining clinical risk stratification for  
4 predicting stroke and thromboembolism in atrial fibrillation using a novel risk factor-based  
5 approach: the euro heart survey on atrial fibrillation. *Chest* 2010; 137: 263-272.  
6  
7  
8
- 9  
10 16. Lip GY. Stroke in atrial fibrillation: epidemiology and thromboprophylaxis. *J Thromb Haemost*  
11 2011; 9 Suppl 1: 344-351.  
12  
13
- 14 17. Potpara TS, Polovina MM, Licina MM, Marinkovic JM, Prostran MS, Lip GY. Reliable  
15 identification of "truly low" thromboembolic risk in patients initially diagnosed with "lone"  
16 atrial fibrillation: the Belgrade atrial fibrillation study. *Circ Arrhythm Electrophysiol* 2012; 5:  
17 319-326.  
18  
19  
20  
21  
22
- 23 18. Olesen JB, Torp-Pedersen C, Hansen ML, Lip GY. The value of the CHA2DS2-VASc score for  
24 refining stroke risk stratification in patients with atrial fibrillation with a CHADS2 score 0-1: a  
25 nationwide cohort study. *Thromb Haemost* 2012; 107: 1172-1179.  
26  
27  
28  
29
- 30 19. Van Staa TP, Setakis E, Di Tanna GL, Lane DA, Lip GY. A comparison of risk stratification  
31 schemes for stroke in 79,884 atrial fibrillation patients in general practice. *J Thromb Haemost*  
32 2011; 9: 39-48.  
33  
34  
35
- 36 20. Abu-Assi E, Otero-Ravina F, Allut Vidal G, Coutado Mendez A, Vaamonde Mosquera L, Sanchez  
37 Loureiro M, Caneda Villar MC, Fernandez Villaverde JM, Maestro Saavedra FJ, Gonzalez-  
38 Juanatey JR, Grupo Barbanza researchers. Comparison of the reliability and validity of four  
39 contemporary risk stratification schemes to predict thromboembolism in non-anticoagulated  
40 patients with atrial fibrillation. *Int J Cardiol* 2013; 166: 205-209.  
41  
42  
43  
44  
45  
46
- 47 21. Royal College of Physicians. Sentinel Stroke National Audit Programme (SSNAP). Clinical audit  
48 first pilot public report; August 2013.  
49  
50  
51
- 52 22. National Clinical Guideline Centre. Atrial fibrillation: the management of atrial fibrillation.  
53 Clinical guideline: methods, evidence and recommendations [NICE CG180]. 2014.  
54  
55  
56  
57  
58  
59  
60

- 1  
2  
3 23. NICE Implementation Collaborative. Consensus supporting local implementation of NICE  
4 guidance on use of the novel (non-Vitamin K antagonist) oral anticoagulants in non-valvular  
5 atrial fibrillation. 2014.  
6  
7  
8  
9  
10 24. Herrett E, Gallagher AM, Bhaskaran K, Forbes H, Mathur R, van Staa T, Smeeth L. Data  
11 Resource Profile: Clinical Practice Research Datalink (CPRD). *Int J Epidemiol* 2015; 44: 827-836.  
12  
13  
14 25. Gallagher AM, van Staa TP, Murray-Thomas T, Schoof N, Clemens A, Ackermann D, Bartels DB.  
15 Population-based cohort study of warfarin-treated patients with atrial fibrillation: incidence of  
16 cardiovascular and bleeding outcomes. *BMJ Open* 2014; 4: e003839.  
17  
18  
19  
20  
21 26. Penfold RB, Zhang F. Use of interrupted time series analysis in evaluating health care quality  
22 improvements. *Acad Pediatr* 2013; 13: S38-44.  
23  
24  
25  
26 27. Bassand JP, Accetta G, Camm AJ, Cools F, Fitzmaurice DA, Fox KA, Goldhaber SZ, Goto S, Haas  
27 S, Hacke W, Kayani G, Mantovani LG, Misselwitz F, Ten Cate H, Turpie AG, Verheugt FW,  
28 Kakkar AK, Garfield-Af Investigators. Two-year outcomes of patients with newly diagnosed  
29 atrial fibrillation: results from GARFIELD-AF. *Eur Heart J* 2016.  
30  
31  
32  
33  
34 28. Huisman MV, Rothman KJ, Paquette M, Teutsch C, Diener HC, Dubner SJ, Halperin JL, Ma C,  
35 Zint K, Elsaesser A, Bartels DB, Lip GY, Gloria-Af Investigators. Antithrombotic Treatment  
36 Patterns in Patients with Newly Diagnosed Nonvalvular Atrial Fibrillation: The GLORIA-AF  
37 Registry, Phase II. *Am J Med* 2015; 128: 1306-1313 e1301.  
38  
39  
40  
41  
42  
43 29. Camm AJ, Accetta G, Ambrosio G, Atar D, Bassand JP, Berge E, Cools F, Fitzmaurice DA,  
44 Goldhaber SZ, Goto S, Haas S, Kayani G, Koretsune Y, Mantovani LG, Misselwitz F, Oh S, Turpie  
45 AG, Verheugt FW, Kakkar AK, Garfield-Af Investigators. Evolving antithrombotic treatment  
46 patterns for patients with newly diagnosed atrial fibrillation. *Heart* 2016.  
47  
48  
49  
50  
51  
52 30. Kirchhof P, Benussi S, Kotecha D, Ahlsson A, Atar D, Casadei B, Castella M, Diener HC,  
53 Heidbuchel H, Hendriks J, Hindricks G, Manolis AS, Oldgren J, Popescu BA, Schotten U, Van  
54 Putte B, Vardas P, Agewall S, Camm J, Baron Esquivias G, et al. 2016 ESC Guidelines for the  
55  
56  
57  
58  
59  
60

- 1  
2  
3 management of atrial fibrillation developed in collaboration with EACTS. *Eur Heart J* 2016; 37:  
4  
5 2893-2962.  
6  
7  
8 31. Friberg L, Hammar N, Ringh M, Pettersson H, Rosenqvist M. Stroke prophylaxis in atrial  
9  
10 fibrillation: who gets it and who does not? Report from the Stockholm Cohort-study on Atrial  
11  
12 Fibrillation (SCAF-study). *Eur Heart J* 2006; 27: 1954-1964.  
13  
14 32. Waldo AL, Becker RC, Tapson VF, Colgan KJ, Committee NS. Hospitalized patients with atrial  
15  
16 fibrillation and a high risk of stroke are not being provided with adequate anticoagulation. *J*  
17  
18 *Am Coll Cardiol* 2005; 46: 1729-1736.  
19  
20  
21 33. Gallagher AM, Rietbrock S, Plumb J, van Staa TP. Initiation and persistence of warfarin or  
22  
23 aspirin in patients with chronic atrial fibrillation in general practice: do the appropriate  
24  
25 patients receive stroke prophylaxis? *J Thromb Haemost* 2008; 6: 1500-1506.  
26  
27  
28 34. Falstaff Study Group, Leizorovicz A, Cohen A, Guenoun M, Mismetti P, Weisslinger N. Influence  
29  
30 of age on the prescription of vitamin K antagonists in outpatients with permanent atrial  
31  
32 fibrillation in France. *Pharmacoepidemiol Drug Saf* 2007; 16: 32-38.  
33  
34  
35 35. Simpson CR, Wilson C, Hannaford PC, Williams D. Evidence for age and sex differences in the  
36  
37 secondary prevention of stroke in Scottish primary care. *Stroke* 2005; 36: 1771-1775.  
38  
39  
40 36. Mant J, Hobbs FD, Fletcher K, Roalfe A, Fitzmaurice D, Lip GY, Murray E, Bafta investigators,  
41  
42 Midland Research Practices Network. Warfarin versus aspirin for stroke prevention in an  
43  
44 elderly community population with atrial fibrillation (the Birmingham Atrial Fibrillation  
45  
46 Treatment of the Aged Study, BAFTA): a randomised controlled trial. *Lancet* 2007; 370: 493-  
47  
48 503.  
49  
50 37. Rash A, Downes T, Portner R, Yeo WW, Morgan N, Channer KS. A randomised controlled trial  
51  
52 of warfarin versus aspirin for stroke prevention in octogenarians with atrial fibrillation  
53  
54 (WASPO). *Age Ageing* 2007; 36: 151-156.  
55  
56  
57  
58  
59  
60

- 1  
2  
3 38. van Walraven C, Hart RG, Connolly S, Austin PC, Mant J, Hobbs FD, Koudstaal PJ, Petersen P,  
4 Perez-Gomez F, Knottnerus JA, Boode B, Ezekowitz MD, Singer DE. Effect of age on stroke  
5 prevention therapy in patients with atrial fibrillation: the atrial fibrillation investigators. *Stroke*  
6 2009; 40: 1410-1416.  
7  
8  
9  
10  
11 39. Garwood CL, Corbett TL. Use of anticoagulation in elderly patients with atrial fibrillation who  
12 are at risk for falls. *Ann Pharmacother* 2008; 42: 523-532.  
13  
14  
15 40. Scowcroft AC, Lee S, Mant J. Thromboprophylaxis of elderly patients with AF in the UK: an  
16 analysis using the General Practice Research Database (GPRD) 2000-2009. *Heart* 2013; 99:  
17 127-132.  
18  
19  
20  
21  
22 41. Benjamin EJ, Wolf PA, D'Agostino RB, Silbershatz H, Kannel WB, Levy D. Impact of atrial  
23 fibrillation on the risk of death: the Framingham Heart Study. *Circulation* 1998; 98: 946-952.  
24  
25  
26  
27 42. Stewart S, Hart CL, Hole DJ, McMurray JJ. A population-based study of the long-term risks  
28 associated with atrial fibrillation: 20-year follow-up of the Renfrew/Paisley study. *Am J Med*  
29 2002; 113: 359-364.  
30  
31  
32  
33 43. Baglin TP, Cousins D, Keeling DM, Perry DJ, Watson HG. Safety indicators for inpatient and  
34 outpatient oral anticoagulant care: [corrected] Recommendations from the British Committee  
35 for Standards in Haematology and National Patient Safety Agency. *Br J Haematol* 2007; 136:  
36 26-29.  
37  
38  
39  
40  
41  
42  
43 44. Herrett E, Thomas SL, Schoonen WM, Smeeth L, Hall AJ. Validation and validity of diagnoses in  
44 the General Practice Research Database: a systematic review. *Br J Clin Pharmacol* 2010; 69: 4-  
45 14.  
46  
47  
48  
49  
50  
51  
52  
53  
54  
55  
56  
57  
58  
59  
60

1  
2  
3 **FIGURE LEGENDS**  
4

5  
6 **Figure 1. Flowchart describing the sample used in each year**  
7

8  
9 **Figure 2. Evolution of the proportion of patients treated with each anticoagulant, with antiplatelet**  
10 **therapy alone or no antithrombotic therapy among patients with NVAF with CHA2DS2-VASc  $\geq 2$**   
11 **separately in newly diagnosed patients (A) and patients diagnosed since 12 months or more (B)**  
12  
13

14  
15  
16 A) Newly diagnosed patients with NVAF  
17

18  
19 B) Patients with NVAF diagnosis since 12 months or more  
20

21  
22 **Figure 3. Time series analysis describing the trends in the evolution of the proportion of patients**  
23 **with NVAF treated with anticoagulants, aspirin, or other antiplatelet therapy alone or without any**  
24 **antithrombotic treatment from April 2012 to April 2015 in the UK, by time since NVAF diagnosis**  
25  
26  
27

28  
29 A. Anticoagulation treatment  
30

31  
32

|                                              | Pre-ESC <sup>1</sup> |      |         | Post-ESC <sup>2</sup> |      |         | Post-NICE <sup>2</sup> |      |         |
|----------------------------------------------|----------------------|------|---------|-----------------------|------|---------|------------------------|------|---------|
|                                              | $\beta$              | SE   | p-value | $\beta$               | SE   | p-value | $\beta$                | SE   | p-value |
| <b>Diagnosed &lt; 12 months</b>              |                      |      |         |                       |      |         |                        |      |         |
| <b>Level</b>                                 | 43.09                | 0.26 | <.0001  | 0.28                  | 0.35 | 0.418   | 0.10                   | 0.49 | 0.846   |
| <b>Trend</b>                                 | 0.34                 | 0.02 | <.0001  | 0.26                  | 0.03 | <.0001  | 0.12                   | 0.09 | 0.171   |
| <b>Diagnosed <math>\geq 12</math> months</b> |                      |      |         |                       |      |         |                        |      |         |
| <b>Level</b>                                 | 49.01                | 0.07 | <.0001  | 0.00                  | 0.10 | 0.981   | -0.16                  | 0.14 | 0.251   |
| <b>Trend</b>                                 | 0.13                 | 0.01 | <.0001  | 0.18                  | 0.01 | <.0001  | 0.15                   | 0.02 | <.0001  |

33  
34  
35  
36  
37  
38  
39  
40  
41  
42  
43  
44  
45  
46  
47

48 <sup>1</sup>For Pre-ESC data are base level, base trend. <sup>2</sup>Post-ESC and Post-NICE data are change in level, change in trend  
49  
50  
51  
52  
53  
54  
55  
56  
57  
58  
59  
60



## B. Aspirin (ASA) or other AP only

|                                             | Pre-ESC <sup>1</sup> |      |         | Post-ESC <sup>2</sup> |      |         | Post-NICE <sup>2</sup> |      |         |
|---------------------------------------------|----------------------|------|---------|-----------------------|------|---------|------------------------|------|---------|
|                                             | $\beta$              | SE   | p-value | $\beta$               | SE   | p-value | $\beta$                | SE   | p-value |
| <b>Diagnosed &lt;12months</b>               |                      |      |         |                       |      |         |                        |      |         |
| <b>Level</b>                                | 41.94                | 0.24 | <.0001  | -0.20                 | 0.31 | 0.518   | -0.63                  | 0.44 | 0.159   |
| <b>Trend</b>                                | -0.36                | 0.02 | <.0001  | -0.26                 | 0.03 | <.0001  | -0.10                  | 0.08 | 0.226   |
| <b>Diagnosed <math>\geq</math>12 months</b> |                      |      |         |                       |      |         |                        |      |         |
| <b>Level</b>                                | 35.05                | 0.06 | <.0001  | 0.03                  | 0.08 | 0.737   | -0.33                  | 0.12 | 0.008   |
| <b>Trend</b>                                | -0.12                | 0.01 | <.0001  | -0.15                 | 0.01 | <.0001  | -0.21                  | 0.02 | <.0001  |

<sup>1</sup>For Pre-ESC data are base level, base trend. <sup>2</sup>Post-ESC and Post-NICE data are change in level, change in trend

## C. Without any antithrombotic treatment

|                                             | Pre-ESC <sup>1</sup> |      |         | Post-ESC <sup>2</sup> |      |         | Post-NICE <sup>2</sup> |      |         |
|---------------------------------------------|----------------------|------|---------|-----------------------|------|---------|------------------------|------|---------|
|                                             | $\beta$              | SE   | p-value | $\beta$               | SE   | p-value | $\beta$                | SE   | p-value |
| <b>Diagnosed &lt;12months</b>               |                      |      |         |                       |      |         |                        |      |         |
| <b>Level</b>                                | 14.97                | 0.15 | <.0001  | -0.08                 | 0.19 | 0.6835  | 0.54                   | 0.27 | 0.057   |
| <b>Trend</b>                                | 0.02                 | 0.01 | 0.211   | 0.00                  | 0.02 | 0.9262  | -0.03                  | 0.05 | 0.612   |
| <b>Diagnosed <math>\geq</math>12 months</b> |                      |      |         |                       |      |         |                        |      |         |
| <b>Level</b>                                | 15.94                | 0.07 | <.0001  | -0.03                 | 0.10 | 0.789   | 0.49                   | 0.14 | 0.001   |
| <b>Trend</b>                                | -0.01                | 0.01 | 0.174   | -0.03                 | 0.01 | 0.000   | 0.06                   | 0.02 | 0.015   |

<sup>1</sup>For Pre-ESC data are base level, base trend. <sup>2</sup>Post-ESC and Post-NICE data are change in level, change in trend

**Table 1. Demographic and clinical characteristics of patients with NVAf on each index date (data given as n, % unless stated otherwise)**

|                                           | April 2012       |      | April 2013       |      | April 2014       |      | April 2015       |      | Jan 2016         |      |
|-------------------------------------------|------------------|------|------------------|------|------------------|------|------------------|------|------------------|------|
|                                           | (n=67327)        |      | (n=66364)        |      | (n=62840)        |      | (n=53150)        |      | (n=45105)        |      |
|                                           | n                | %    | n                | %    | n                | %    | n                | %    | n                | %    |
| <b>Age (years) mean (SD)</b>              | 78 (10)          |      | 78 (10)          |      | 78 (10)          |      | 78 (9.9)         |      | 78 (9.9)         |      |
| <b>Gender: Male</b>                       | 35277            | 52.4 | 35096            | 52.9 | 33477            | 53.3 | 28756            | 54.1 | 24495            | 54.3 |
| <b>Country</b>                            |                  |      |                  |      |                  |      |                  |      |                  |      |
| England                                   | 51055            | 75.8 | 49721            | 74.9 | 45422            | 72.3 | 36910            | 69.4 | 28226            | 62.6 |
| Wales                                     | 7193             | 10.7 | 7168             | 10.8 | 7658             | 12.2 | 6791             | 12.8 | 7088             | 15.7 |
| Scotland                                  | 6826             | 10.1 | 7132             | 10.7 | 7331             | 11.7 | 6850             | 12.9 | 7060             | 15.7 |
| Northern Ireland                          | 2253             | 3.3  | 2343             | 3.5  | 2429             | 3.9  | 2599             | 4.9  | 2731             | 6.1  |
| <b>Smoking status</b>                     |                  |      |                  |      |                  |      |                  |      |                  |      |
| Current smoker                            | 4685             | 7.0  | 4500             | 6.8  | 4087             | 6.5  | 3305             | 6.2  | 2877             | 6.4  |
| Past smoker                               | 34297            | 50.9 | 34019            | 51.3 | 32258            | 51.3 | 27389            | 51.5 | 23119            | 51.3 |
| <b>Body mass index (kg/m<sup>2</sup>)</b> |                  |      |                  |      |                  |      |                  |      |                  |      |
| Missing data                              | 5283             | 7.8  | 4588             | 6.9  | 3990             | 6.3  | 3209             | 6.0  | 2667             | 5.9  |
| Median (Q1-Q3)                            | 27.2 (24.1-31.1) |      | 27.2 (24.1-31.2) |      | 27.3 (24.2-31.2) |      | 27.4 (24.3-31.4) |      | 27.6 (24.3-31.5) |      |
| <b>GP consultation in the last</b>        |                  |      |                  |      |                  |      |                  |      |                  |      |
| year Median (Q1-Q3)                       | 13 (8-22)        |      | 13 (8-22)        |      | 14 (8-23)        |      | 14 (8-23)        |      | 14 (8-22)        |      |
| <b>Newly diagnosed NVAf</b>               | 8197             | 12.2 | 8104             | 12.2 | 7421             | 11.8 | 6255             | 11.8 | 5564             | 12.3 |
| <b>Stroke risk factors</b>                |                  |      |                  |      |                  |      |                  |      |                  |      |
| Previous stroke/TIA                       | 13136            | 19.5 | 12966            | 19.5 | 12312            | 19.6 | 10393            | 19.6 | 8986             | 19.9 |
| Other arterial thromboembolism            | 281              | 0.4  | 267              | 0.4  | 243              | 0.4  | 207              | 0.4  | 182              | 0.4  |
| Congestive heart failure                  | 11970            | 17.8 | 11536            | 17.4 | 10780            | 17.2 | 9296             | 17.5 | 8272             | 18.3 |
| Coronary artery disease                   | 21158            | 31.4 | 20213            | 30.5 | 18691            | 29.7 | 15383            | 28.9 | 12892            | 28.6 |
| Peripheral arterial disease               | 4136             | 6.1  | 3978             | 6    | 3671             | 5.8  | 2958             | 5.6  | 2491             | 5.5  |
| Hypertension                              | 65349            | 97.1 | 64557            | 97.3 | 61255            | 97.5 | 51872            | 97.6 | 44039            | 97.6 |
| Diabetes mellitus                         | 13949            | 20.7 | 13974            | 21.1 | 13564            | 21.6 | 11779            | 22.2 | 10222            | 22.7 |

|                                         | April 2012 |      | April 2013 |      | April 2014 |      | April 2015 |      | Jan 2016  |      |
|-----------------------------------------|------------|------|------------|------|------------|------|------------|------|-----------|------|
|                                         | (n=67327)  |      | (n=66364)  |      | (n=62840)  |      | (n=53150)  |      | (n=45105) |      |
|                                         | n          | %    | n          | %    | n          | %    | n          | %    | n         | %    |
| <b>CHA2DS2-VASc score</b>               |            |      |            |      |            |      |            |      |           |      |
| Median (Q1-Q3)                          | 4 (3-5)    |      | 4 (3-5)    |      | 4 (3-5)    |      | 4 (3-5)    |      | 4 (3-5)   |      |
| <b>Modified HAS-BLED score*</b>         |            |      |            |      |            |      |            |      |           |      |
| Median (Q1-Q3)                          | 4 (3-4)    |      | 4 (3-4)    |      | 4 (3-4)    |      | 4 (3-4)    |      | 4 (3-4)   |      |
| <b>Previous bleedings**</b>             | 22136      | 32.9 | 22260      | 33.5 | 21770      | 34.6 | 18669      | 35.1 | 15889     | 35.2 |
| Intracranial                            | 1166       | 1.7  | 1223       | 1.8  | 1238       | 2.0  | 1039       | 2.0  | 897       | 2.0  |
| Gastrointestinal                        | 7755       | 11.5 | 7700       | 11.6 | 7575       | 12.1 | 6536       | 12.3 | 5677      | 12.6 |
| <b>Renal disease***</b>                 | 23367      | 34.7 | 23003      | 34.7 | 21391      | 34   | 17796      | 33.5 | 15061     | 33.4 |
| <b>Liver disease</b>                    | 454        | 0.7  | 478        | 0.7  | 475        | 0.8  | 425        | 0.8  | 393       | 0.9  |
| <b>Number of concomitant treatments</b> |            |      |            |      |            |      |            |      |           |      |
| Median (Q1-Q3)                          | 8 (5-11)   |      | 8 (5-11)   |      | 8 (5-11)   |      | 8 (5-11)   |      | 7 (5-11)  |      |

Abbreviations: GP, general practitioner; NVAf, non-valvular atrial fibrillation; SD, standard deviation; TIA, transient ischaemic attack

\* Excluding INR component as not consistently reported in CPRD, score range: 0–8.

\*\* Including intracranial, gastrointestinal, intraocular, pericardial, urinary, intra-articular, lung, or other bleed. Gynecological bleeds excluded.

\*\*\* Including any renal disease, chronic kidney disease stage 1-5

**Table 2. Evolution of the proportion of patients treated with anticoagulants, with antiplatelet therapy alone or no antithrombotic therapy among patients with NVAf with CHA2DS2-VASc  $\geq$  2**

|                            | April 2012              | April 2013              | April 2014              | April 2015              | January 2016            |
|----------------------------|-------------------------|-------------------------|-------------------------|-------------------------|-------------------------|
|                            | % (95% CI)              |
| Anticoagulation            | <b>50.2</b> (49.8-50.5) | <b>53.2</b> (52.8-53.5) | <b>57.5</b> (57.1-57.9) | <b>62.9</b> (62.5-63.3) | <b>66.9</b> (66.5-67.3) |
| Antiplatelet therapy alone | <b>34.2</b> (33.9-34.5) | <b>31.2</b> (30.8-31.5) | <b>27.7</b> (27.3-28.0) | <b>21.8</b> (21.5-22.2) | <b>17.4</b> (17.1-17.8) |
| No antithrombotic therapy  | <b>15.6</b> (15.4-15.9) | <b>15.7</b> (15.4-15.9) | <b>14.8</b> (14.6-15.1) | <b>15.3</b> (15.0-15.6) | <b>15.7</b> (15.4-16.0) |

Abbreviations: CI, confidence interval

For peer review only  
Highly Confidential

**Table 3. Factors associated with the prescription of aspirin or other antiplatelet for TE prevention in NVAf in April 2015 (vs. anticoagulation): results of the GEE model**

|                                          | Antiplatelet therapy |      | Treated with  |      | OR (95% CI)       | P-value |
|------------------------------------------|----------------------|------|---------------|------|-------------------|---------|
|                                          | alone                |      | anticoagulant |      |                   |         |
|                                          | N=11,609             |      | N= 33,413     |      |                   |         |
|                                          | n                    | %    | N             | %    |                   |         |
| <b>Patient age (years)</b>               |                      |      |               |      |                   | < .0001 |
| < 65                                     | 890                  | 7.7  | 2016          | 6.0  | 1.22 (1.10-1.35)  |         |
| 65 to 74                                 | 2769                 | 23.9 | 8780          | 26.3 | Reference         |         |
| 75 to 84                                 | 3842                 | 33.1 | 14363         | 43.0 | 0.94 (0.87-1.02)  |         |
| ≥ 85                                     | 4108                 | 35.4 | 8254          | 24.7 | 1.72 (1.58-1.87)  |         |
| <b>Country</b>                           |                      |      |               |      |                   | 0.001   |
| England                                  | 8065                 | 69.5 | 22909         | 68.6 | Reference.        |         |
| Wales                                    | 1383                 | 11.9 | 4524          | 13.5 | 0.80 (0.70-0.91)  |         |
| Scotland                                 | 1590                 | 13.7 | 4231          | 12.7 | 1.06 (0.96-1.19)  |         |
| N. Ireland                               | 571                  | 4.9  | 1749          | 5.2  | 0.83 (0.72-0.97)  |         |
| <b>Gender: male (reference = female)</b> | 5364                 | 46.2 | 14580         | 43.6 | 0.87 (0.81-0.93)  | <.0001  |
| <b>Time since NVAf diagnosis</b>         |                      |      |               |      |                   | <.0001  |
| < 6 months                               | 497                  | 4.3  | 2121          | 6.3  | Reference         |         |
| 6 to 12 months                           | 442                  | 3.8  | 2175          | 6.5  | 0.96 (0.83-1.11)  |         |
| 12 to 24 months                          | 979                  | 8.4  | 3886          | 11.6 | 1.24 (1.10-1.41)  |         |
| 2 to 5 years since                       | 3095                 | 26.7 | 8496          | 25.4 | 1.89 (1.68-2.12)  |         |
| ≥ 5 years                                | 6596                 | 56.8 | 16735         | 50.1 | 2.17 (1.93-2.44)  |         |
| <b>Previous oral AC treatment</b>        |                      |      |               |      |                   | <.0001  |
| No previous treatment                    | 8093                 | 69.7 | 21189         | 63.4 | Reference         |         |
| NOAC only                                | 87                   | 0.7  | 411           | 1.2  | 0.61 (0.46-0.81)  |         |
| VKA and NOAC                             | 76                   | 0.7  | 490           | 1.5  | 0.37 (0.29-0.47)  |         |
| VKA only                                 | 3353                 | 28.9 | 11323         | 33.9 | 0.65 (0.59-0.72)  |         |
| <b>Previous stroke/TIA/arterial TE</b>   | 2291                 | 19.7 | 7341          | 22.0 | 0.83 (0.75-0.92)  | 0.0008  |
| <b>Congestive heart failure</b>          | 1722                 | 14.8 | 6685          | 20.0 | 0.61 (0.56-0.66)  | <.0001  |
| <b>Previous coronary artery disease</b>  | 4535                 | 39.1 | 9636          | 28.8 | 1.60 (1.50--1.71) | <.0001  |

|                                    | Antiplatelet therapy |      | Treated with  |      | OR (95% CI)      | P-value |
|------------------------------------|----------------------|------|---------------|------|------------------|---------|
|                                    | alone                |      | anticoagulant |      |                  |         |
|                                    | N=11,609             |      | N= 33,413     |      |                  |         |
|                                    | n                    | %    | N             | %    |                  |         |
| <b>Peripheral arterial disease</b> | 833                  | 7.2  | 1887          | 5.6  | 1.20 (1.10-1.31) | 0.0001  |
| <b>Hypertension</b>                | 11308                | 97.4 | 32869         | 98.4 | 0.59 (0.51-0.69) | <.0001  |
| <b>CHA2DS2-VASc score</b>          |                      |      |               |      |                  | <.0001  |
| 2                                  | 1425                 | 12.3 | 3444          | 10.3 | Reference        |         |
| 3                                  | 2408                 | 20.7 | 7482          | 22.4 | 0.69 (0.63-0.76) |         |
| 4                                  | 3206                 | 27.6 | 9656          | 28.9 | 0.56 (0.50-0.64) |         |
| 5                                  | 2306                 | 19.9 | 6544          | 19.6 | 0.54 (0.46-0.64) |         |
| ≥6                                 | 2264                 | 19.5 | 6287          | 18.9 | 0.52 (0.42-0.65) |         |
| <b>Previous bleed</b>              |                      |      |               |      |                  | <.0001  |
| No bleed                           | 7522                 | 64.8 | 21577         | 64.6 | Reference        |         |
| Intracranial bleed                 | 346                  | 3.0  | 404           | 1.2  | 3.02 (2.56-3.56) |         |
| Gastrointestinal bleed             | 1430                 | 12.3 | 4001          | 11.8 | 0.96 (0.90-1.02) |         |
| Other bleed                        | 2311                 | 19.9 | 7473          | 22.4 | 0.82 (0.77-0.87) |         |
| <b>History of fall</b>             | 3474                 | 29.9 | 8211          | 24.6 | 1.14 (1.08-1.20) | <.0001  |
| <b>Renal disease</b>               | 4106                 | 35.4 | 11542         | 34.5 | 0.94 (0.90-0.99) | 0.0131  |
| <b>Liver disease</b>               | 102                  | 0.9  | 214           | 0.6  | 1.32 (1.03-1.70) | 0.0414  |
| <b>Number of comedications</b>     |                      |      |               |      |                  | <.0001  |
| < 5                                | 1448                 | 12.5 | 6879          | 20.6 | Reference        |         |
| 5 to 9                             | 5040                 | 43.4 | 14825         | 44.4 | 1.71 (1.60-1.82) |         |
| 10 to 14                           | 3169                 | 27.3 | 7782          | 23.3 | 2.08 (1.93-2.26) |         |
| 15 or more                         | 1952                 | 16.8 | 3927          | 11.8 | 2.66 (2.43-2.91) |         |

Abbreviations: CI, confidence interval; GEE, generalised estimating equations; VKA, vitamin K antagonist; OAC, oral anticoagulant; NVAF, non-valvular atrial fibrillation; TIA, transient ischaemic attack; TE, thromboembolism; OR, odds ratio; NOAC, novel oral anticoagulant.

Management of NVAF in Europe and the UK

**Table 4. Factor associated with the absence of TE prevention (no antithrombotic therapy vs. anticoagulation) in NVAF in April 2015: results of the GEE model**

| Parameter                                | No antithrombotic therapy |      | Treated with anticoagulant |      | OR (95% CI)      | P-value |
|------------------------------------------|---------------------------|------|----------------------------|------|------------------|---------|
|                                          | N=8,128                   |      | N= 33,413                  |      |                  |         |
|                                          | n                         | %    | n                          | %    |                  |         |
| <b>Patient age (years)</b>               |                           |      |                            |      |                  | <.0001  |
| < 65                                     | 1299                      | 16   | 2016                       | 6.0  | 1.64 (1.47-1.83) |         |
| 65 to 74                                 | 2214                      | 27.2 | 8780                       | 26.3 | Reference        |         |
| 75 to 84                                 | 2367                      | 29.1 | 14363                      | 43.0 | 1.09 (0.99-1.20) |         |
| ≥ 85                                     | 2248                      | 27.7 | 8254                       | 24.7 | 1.86 (1.68-2.07) |         |
| <b>Gender: male (reference = female)</b> | 4450                      | 54.7 | 14580                      | 43.6 | 0.51 (0.46-0.56) | <.0001  |
| <b>Country</b>                           |                           |      |                            |      |                  |         |
| England                                  | 5936                      | 73.0 | 22909                      | 68.6 | Reference        | <.0001  |
| Wales                                    | 884                       | 10.9 | 4524                       | 13.5 | 0.80 (0.69-0.93) |         |
| Scotland                                 | 1029                      | 12.7 | 4231                       | 12.7 | 1.09 (0.96-1.23) |         |
| Northern Ireland                         | 279                       | 3.4  | 1749                       | 5.2  | 0.69 (0.57-0.83) |         |
| <b>Time since NVAF diagnosis</b>         |                           |      |                            |      |                  | <.0001  |
| < 6 months                               | 592                       | 7.3  | 2121                       | 6.3  | Reference        |         |
| 6 to 12 months                           | 427                       | 5.3  | 2175                       | 6.5  | 0.71 (0.61-0.82) |         |
| 12 to 24 months                          | 864                       | 10.6 | 3886                       | 11.6 | 0.82 (0.71-0.94) |         |
| 2 to 5 years                             | 2086                      | 25.7 | 8496                       | 25.4 | 0.93 (0.82-1.06) |         |
| ≥ 5 years                                | 4159                      | 51.2 | 16735                      | 50.1 | 1.07 (0.94-1.23) |         |
| <b>Previous OAC treatment</b>            |                           |      |                            |      |                  | <.0001  |
| No previous OAC                          | 5137                      | 63.2 | 21189                      | 63.4 | Reference        |         |
| NOAC only                                | 189                       | 2.3  | 411                        | 1.2  | 1.82 (1.36-2.43) |         |
| VKA and NOAC                             | 159                       | 2.0  | 490                        | 1.5  | 1.50 (1.23-1.84) |         |
| VKA only                                 | 2643                      | 32.5 | 11323                      | 33.9 | 0.97 (0.88-1.07) |         |
| <b>Previous stroke/TIA/ arterial TE</b>  | 968                       | 11.9 | 7341                       | 22.0 | 0.55 (0.48-0.64) | <.0001  |
| <b>Congestive heart failure</b>          | 889                       | 10.9 | 6685                       | 20.0 | 0.76 (0.69-0.84) | <.0001  |

## Management of NVAF in Europe and the UK

| Parameter                               | No antithrombotic therapy |       | Treated with anticoagulant |      | OR (95% CI)       | P-value |
|-----------------------------------------|---------------------------|-------|----------------------------|------|-------------------|---------|
|                                         | N=8,128                   |       | N= 33,413                  |      |                   |         |
|                                         | n                         | %     | n                          | %    |                   |         |
| <b>Previous coronary artery disease</b> | 1212                      | 14.9  | 9636                       | 28.8 | 0.76 (0.70-0.84)  | <.0001  |
| <b>Hypertension</b>                     | 7695                      | 94.7  | 32869                      | 98.4 | 0.62 (0.53-0.72)  | <.0001  |
| <b>CHA2DS2-VASc score</b>               |                           |       |                            |      |                   | <.0001  |
| 2                                       | 2212                      | 27.2  | 3444                       | 10.3 | Reference         |         |
| 3                                       | 2034                      | 25    | 7482                       | 22.4 | 0.48 (0.43-0.54)  |         |
| 4                                       | 2057                      | 25.3  | 9656                       | 28.9 | 0.33 (0.28-0.39)  |         |
| 5                                       | 987                       | 12.1  | 6544                       | 19.6 | 0.28 (0.22-0.35)  |         |
| ≥6                                      | 838                       | 10.27 | 6287                       | 18.9 | 0.27 (0.20-0.36)  |         |
| <b>Previous bleed</b>                   |                           |       |                            |      |                   | <.0001  |
| No bleed                                | 5382                      | 66.2  | 21577                      | 64.6 | Reference         |         |
| IC bleed                                | 289                       | 3.6   | 404                        | 1.2  | 8.03 (6.43-10.02) |         |
| GI bleed                                | 1016                      | 12.5  | 4001                       | 11.8 | 1.24 (1.14-1.35)  |         |
| Other bleed                             | 1441                      | 17.7  | 7473                       | 22.4 | 0.91 (0.85-0.97)  |         |
| <b>History of peptic ulcer</b>          | 465                       | 5.7   | 1743                       | 5.2  | 1.36 (1.21-1.52)  | <.0001  |
| <b>History of anaemia</b>               | 227                       | 2.8   | 880                        | 2.6  | 1.44 (1.24-1.67)  | <.0001  |
| <b>History of fall</b>                  | 2097                      | 25.8  | 8211                       | 24.6 | 1.20 (1.13-1.28)  | <.0001  |
| <b>Renal disease</b>                    | 2148                      | 26.4  | 11542                      | 34.5 | 0.90 (0.84-0.96)  | 0.0016  |
| <b>Liver disease</b>                    | 109                       | 1.3   | 214                        | 0.6  | 2.39 (1.87-3.05)  | <.0001  |
| <b>Active cancer</b>                    | 455                       | 3.9   | 1367                       | 4.1  | 1.19 (1.06-1.35)  | 0.0053  |
| <b>Number of co-medications</b>         |                           |       |                            |      |                   | <.0001  |
| < 5                                     | 3384                      | 41.6  | 6879                       | 20.6 | Reference         |         |
| 5 to 9                                  | 2791                      | 34.3  | 14825                      | 44.4 | 0.49 (0.45-0.52)  |         |
| 10 to 14                                | 1271                      | 15.6  | 7782                       | 23.3 | 0.46 (0.43-0.50)  |         |
| ≥15                                     | 682                       | 8.4   | 3927                       | 11.8 | 0.53 (0.48-0.59)  |         |

Abbreviations: CI, confidence interval; GEE, generalised estimating equations; VKA, vitamin K antagonist; OAC, oral anticoagulant; NVAF, non-valvular atrial fibrillation; TIA, transient ischaemic attack; TE, thromboembolism; OR, odds ratio; NOAC, novel oral anticoagulant



1  
2  
3  
4  
5  
6  
7  
8  
9  
10  
11  
12  
13  
14  
15  
16  
17  
18  
19  
20  
21  
22  
23  
24  
25  
26  
27  
28  
29  
30  
31  
32  
33  
34  
35  
36  
37  
38  
39  
40  
41  
42  
43  
44  
45  
46  
47  
48  
49  
50  
51  
52  
53  
54  
55  
56  
57  
58  
59  
60

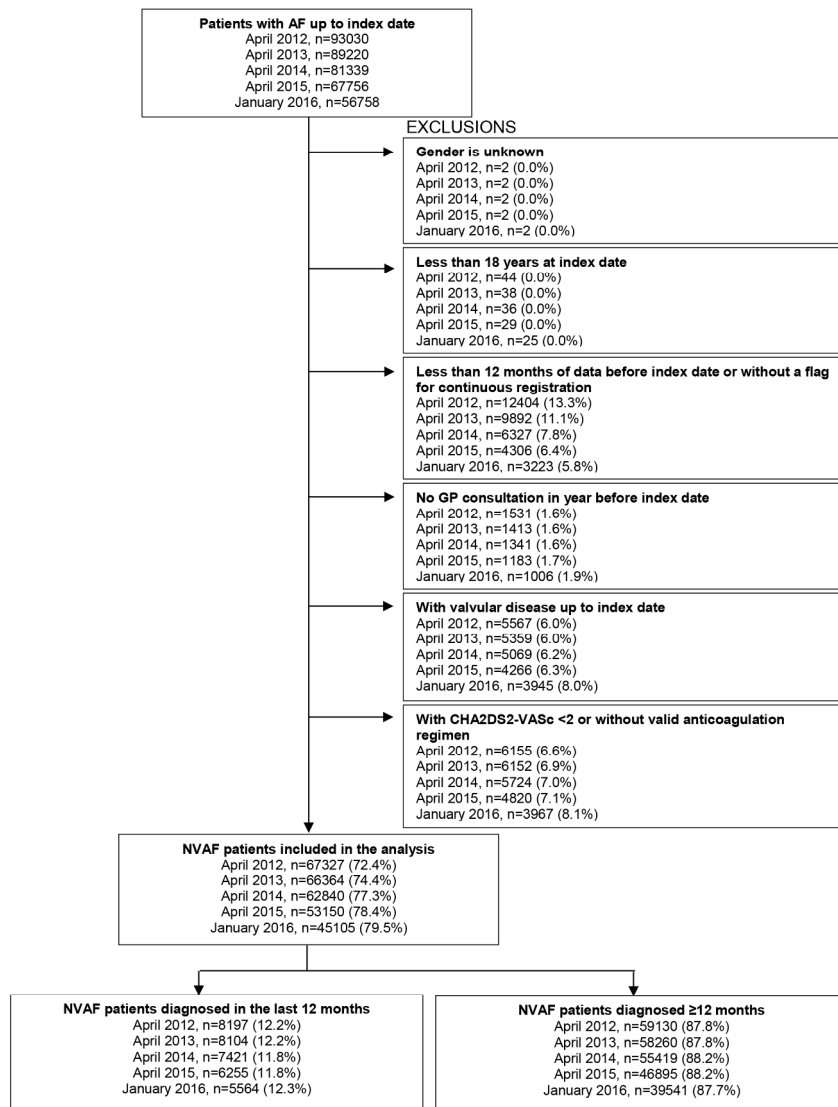

172x246mm (300 x 300 DPI)

1  
2  
3  
4  
5  
6  
7  
8  
9  
10  
11  
12  
13  
14  
15  
16  
17  
18  
19  
20  
21  
22  
23  
24  
25  
26  
27  
28  
29  
30  
31  
32  
33  
34  
35  
36  
37  
38  
39  
40  
41  
42  
43  
44  
45  
46  
47  
48  
49  
50  
51  
52  
53  
54  
55  
56  
57  
58  
59  
60



113x60mm (300 x 300 DPI)

review only



113x59mm (300 x 300 DPI)

review only

1  
2  
3  
4  
5  
6  
7  
8  
9  
10  
11  
12  
13  
14  
15  
16  
17  
18  
19  
20  
21  
22  
23  
24  
25  
26  
27  
28  
29  
30  
31  
32  
33  
34  
35  
36  
37  
38  
39  
40  
41  
42  
43  
44  
45  
46  
47  
48  
49  
50  
51  
52  
53  
54  
55  
56  
57  
58  
59  
60

1  
2  
3  
4  
5  
6  
7  
8  
9  
10  
11  
12  
13  
14  
15  
16  
17  
18  
19  
20  
21  
22  
23  
24  
25  
26  
27  
28  
29  
30  
31  
32  
33  
34  
35  
36  
37  
38  
39  
40  
41  
42  
43  
44  
45  
46  
47  
48  
49  
50  
51  
52  
53  
54  
55  
56  
57  
58  
59  
60

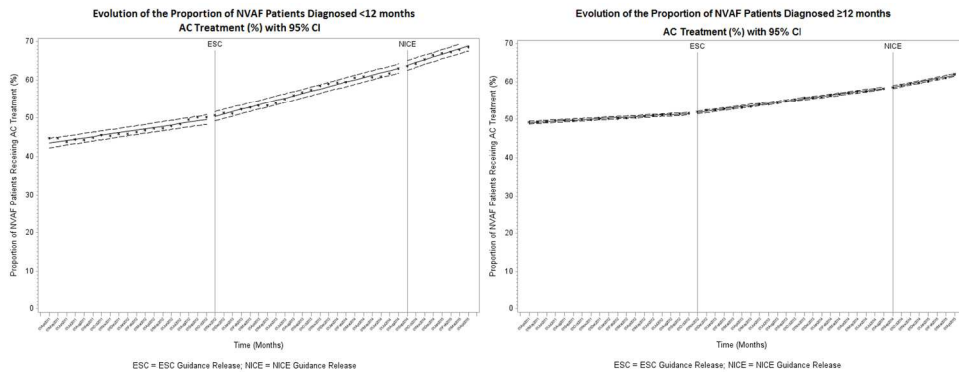

172x68mm (300 x 300 DPI)

Peer review only



172x70mm (300 x 300 DPI)

Peer review only

1  
2  
3  
4  
5  
6  
7  
8  
9  
10  
11  
12  
13  
14  
15  
16  
17  
18  
19  
20  
21  
22  
23  
24  
25  
26  
27  
28  
29  
30  
31  
32  
33  
34  
35  
36  
37  
38  
39  
40  
41  
42  
43  
44  
45  
46  
47  
48  
49  
50  
51  
52  
53  
54  
55  
56  
57  
58  
59  
60

1  
2  
3  
4  
5  
6  
7  
8  
9  
10  
11  
12  
13  
14  
15  
16  
17  
18  
19  
20  
21  
22  
23  
24  
25  
26  
27  
28  
29  
30  
31  
32  
33  
34  
35  
36  
37  
38  
39  
40  
41  
42  
43  
44  
45  
46  
47  
48  
49  
50  
51  
52  
53  
54  
55  
56  
57  
58  
59  
60

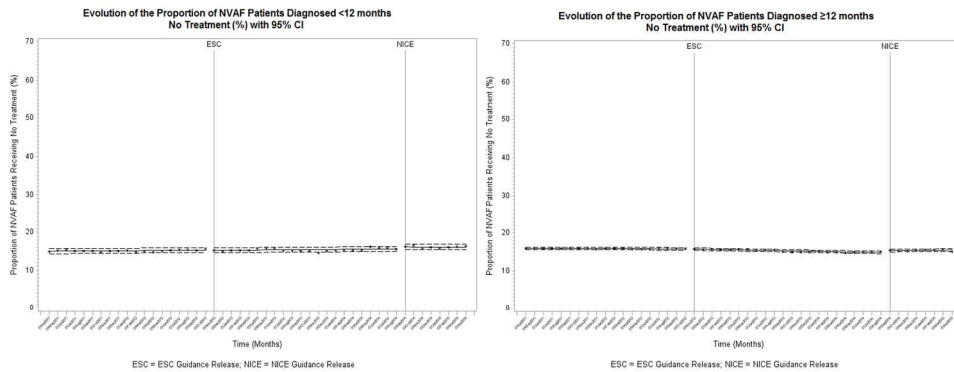

172x70mm (300 x 300 DPI)

Peer review only

1 Management of NVAf in Europe and the UK  
 2  
 3

4 **DATA SUPPLEMENT**  
 5

6 **Table s1. READ code descriptions**  
 7

|                  |                                                           |
|------------------|-----------------------------------------------------------|
| 8 <b>G11..00</b> | <b>Mitral valve diseases</b>                              |
| 9 G540.15        | Mitral valve prolapse                                     |
| 10 G110.00       | Mitral stenosis                                           |
| 11 G540.00       | Mitral valve incompetence                                 |
| 12 G541.00       | Aortic valve disorders                                    |
| 13 G540000       | Mitral incompetence, non-rheumatic                        |
| 14 G130.00       | Mitral and aortic stenosis                                |
| 15 G13..00       | Diseases of mitral and aortic valves                      |
| 16 G541400       | Aortic valve stenosis with insufficiency                  |
| 17 G131.14       | Mitral stenosis and aortic regurgitation                  |
| 18 G544200       | Combined disorders of mitral, aortic and tricuspid valves |
| 19 G541z00       | Aortic valve disorders NOS                                |
| 20 G544100       | Disorders of both mitral and tricuspid valves             |
| 21 G540z00       | Mitral valve disorders NOS                                |
| 22 G113.00       | Nonrheumatic mitral valve stenosis                        |
| 23 G13z.00       | Mitral and aortic valve disease NOS                       |
| 24 G11z.00       | Mitral valve disease NOS                                  |
| 25 G133.00       | Mitral and aortic incompetence                            |
| 26 G132.12       | Mitral incompetence and aortic stenosis                   |
| 27 G540200       | Mitral valve prolapse                                     |
| 28 G132.00       | Mitral insufficiency and aortic stenosis                  |
| 29 G132.13       | Mitral regurgitation and aortic stenosis                  |
| 30 G540100       | Mitral incompetence, cause unspecified                    |
| 31 G540300       | Mitral valve leaf prolapse                                |
| 32 G544.00       | Multiple valve diseases                                   |
| 33 G540.12       | Mitral valve insufficiency                                |
| 34 G112.13       | Mitral stenosis with regurgitation                        |
| 35 G112.00       | Mitral stenosis with insufficiency                        |
| 36 Gyu5600       | [X]Other aortic valve disorders                           |
| 37 G131.00       | Mitral stenosis and aortic insufficiency                  |
| 38 G12z.00       | Rheumatic aortic valve disease NOS                        |
| 39 G112.12       | Mitral stenosis with incompetence                         |
| 40 Gyu1000       | [X]Other mitral valve diseases                            |
| 41 P65..00       | Congenital mitral stenosis                                |

## Management of NVAf in Europe and the UK

|                                                    |                                                            |
|----------------------------------------------------|------------------------------------------------------------|
| G544X00                                            | Multiple valve disease, unspecified                        |
| G114.00                                            | Ruptured mitral valve cusp                                 |
| G131.13                                            | Mitral stenosis and aortic incompetence                    |
| P66..00                                            | Congenital mitral insufficiency                            |
| P652.00                                            | Parachute deformity of the mitral valve                    |
| G13y.00                                            | Multiple mitral and aortic valve involvement               |
| Gyu5A00                                            | [X]Aortic valve disorders in diseases classified elsewhere |
| P650.00                                            | Congenital mitral stenosis, unspecified                    |
| G133.11                                            | Mitral and aortic insufficiency                            |
| Gyu5500                                            | [X]Other nonrheumatic mitral valve disorders               |
| P65z.00                                            | Congenital mitral stenosis NOS                             |
| Gyu5D00                                            | [X]Multiple valve disorders/diseases CE                    |
| <b>READ Codes for prosthetic valve description</b> |                                                            |
| 7911.12                                            | Replacement of aortic valve                                |
| P641.00                                            | Bicuspid aortic valve                                      |
| 7910300                                            | Replacement of mitral valve NEC                            |
| 7910.12                                            | Replacement of mitral valve                                |
| 7910.12                                            | Replacement of mitral valve                                |
| 7914300                                            | Replacement of valve of heart NEC                          |
| 7914200                                            | Prosthetic replacement of valve of heart NEC               |
| 7910.00                                            | Plastic repair of mitral valve                             |
| 7911.00                                            | Plastic repair of aortic valve                             |
| 7911300                                            | Replacement of aortic valve NEC                            |
| 7915000                                            | Revision of plastic repair of mitral valve                 |
| 7916000                                            | Open mitral valvotomy                                      |
| 7917000                                            | Closed mitral valvotomy                                    |
| 7910200                                            | Prosthetic replacement of mitral valve                     |
| 7910200                                            | Prosthetic replacement of mitral valve                     |
| 7910400                                            | Mitral valvuloplasty NEC                                   |
| ZV43300                                            | [V]Has artificial heart valve                              |
| 7914.11                                            | Replacement of unspecified valve of heart                  |
| 7910211                                            | Bjork-Shiley prosthetic replacement of mitral valve        |
| 7911200                                            | Prosthetic replacement of aortic valve                     |
| 7910.11                                            | Mitral valvuloplasty                                       |
| 7914212                                            | Starr prosthetic replacement of valve of heart             |
| 7911100                                            | Xenograft replacement of aortic valve                      |



## Management of NVAF in Europe and the UK

|         |                                                            |
|---------|------------------------------------------------------------|
| 7911y00 | Other specified plastic repair of aortic valve             |
| ZV45H00 | [V]Presence of prosthetic heart valve                      |
| 7910z00 | Plastic repair of mitral valve NOS                         |
| 7911000 | Allograft replacement of aortic valve                      |
| 7915100 | Revision of plastic repair of aortic valve                 |
| 7914211 | Edwards prosthetic replacement of valve of heart           |
| TB01200 | Implant of heart valve prosthesis + complication, no blame |
| 7910213 | Carpentier prosthetic replacement of mitral valve          |
| 7910100 | Xenograft replacement of mitral valve                      |
| 7919000 | Percutaneous transluminal mitral valvotomy                 |
| 7911z00 | Plastic repair of aortic valve NOS                         |
| 7910212 | Bjork-Shiley prosthetic replacement of mitral valve        |
| 7910y00 | Other specified plastic repair of mitral valve             |
| SP00200 | Mechanical complication of heart valve prosthesis          |
| SyuK611 | [X] Embolism from prosthetic heart valve                   |
| 790D700 | Replacement of valved cardiac conduit                      |
| 7914100 | Xenograft replacement of valve of heart NEC                |
| 7914000 | Allograft replacement of valve of heart NEC                |
| ZVu6e00 | [X]Presence of other heart valve replacement               |
| 7910214 | Edwards prosthetic replacement of mitral valve             |
| 7910411 | Mitral valve repair NEC                                    |
| 7911411 | Aortic valve repair NEC                                    |
| 7910000 | Allograft replacement of mitral valve                      |
| 7911600 | Transluminal aortic valve implantation                     |
| 7911500 | Transapical aortic valve implantation                      |
| 7914600 | Replacement of truncal valve                               |
| 7918000 | Annuloplasty of mitral valve                               |

Management of NVAf in Europe and the UK

**Table s2. Proportion of patients with NVAf treated in April 2012, 2013, 2014, and 2015 in the UK, according to duration of diagnosis**

|                                   | April 2012<br>% [95% CI] | April 2013<br>% [95% CI] | April 2014<br>% [95% CI] | April 2015<br>% [95% CI] | January 2016<br>% [95% CI] |
|-----------------------------------|--------------------------|--------------------------|--------------------------|--------------------------|----------------------------|
| <i>Diagnosed &lt; 12 months</i>   |                          |                          |                          |                          |                            |
| <b>Anticoagulation treatment</b>  | <b>47.2 [46.2-48.3]</b>  | <b>53.2 [52.1-54.2]</b>  | <b>61.0 [59.9-62.0]</b>  | <b>68.7 [67.6-69.8]</b>  | <b>72.5 [71.3-73.7]</b>    |
| VKA                               | 46.4 [45.4-47.4]         | 49.5 [48.5-50.6]         | 50.8 [49.7-51.9]         | 42.0 [40.8-43.1]         | 31.8 [30.6-33.0]           |
| Apixaban                          | -                        | -                        | 1.7 [1.5-2.0]            | 8.8 [8.1-9.5]            | 16.6 [15.6-17.5]           |
| Rivaroxaban                       | -                        | 1.2 [1.0-1.5]            | 5.5 [5.0-6.0]            | 14.5 [13.7-15.3]         | 21.5 [20.4-22.6]           |
| Dabigatran                        | 0.3 [0.2-0.4]            | 2.0 [1.7-2.3]            | 2.6 [2.3-2.9]            | 2.8 [2.5-3.2]            | 2.4 [2.0-2.8]              |
| Parenteral anticoagulant          | 0.5 [0.4-0.6]            | 0.5 [0.3-0.6]            | 0.4 [0.2-0.5]            | 0.6 [0.4-0.8]            | 0.2 [0.1-0.4]              |
| <b>Antiplatelet therapy alone</b> | <b>38.1 [37-39.1]</b>    | <b>31.2 [30.2-32.1]</b>  | <b>23.8 [22.9-24.8]</b>  | <b>15 [14.2-15.9]</b>    | <b>11.3 [10.5-12.1]</b>    |
| <b>No antithrombotic therapy</b>  | <b>14.7 [14-15.4]</b>    | <b>15.6 [14.9-16.4]</b>  | <b>15.2 [14.4-16]</b>    | <b>16.3 [15.4-17.2]</b>  | <b>16.2 [15.2-17.1]</b>    |
| <i>Diagnosed ≥ 12 months</i>      |                          |                          |                          |                          |                            |
| <b>Anticoagulation treatment</b>  | <b>50.6 [50.2-51.0]</b>  | <b>53.2 [52.8-53.5]</b>  | <b>57.0 [56.6-57.4]</b>  | <b>62.1 [61.7-62.5]</b>  | <b>66.1 [65.6-66.6]</b>    |
| VKA                               | 50.2 [49.8-50.6]         | 51.7 [51.3-52.1]         | 53.1 [52.7-53.5]         | 53.0 [52.5-53.4]         | 50.9 [50.4-51.4]           |
| Apixaban                          | -                        | -                        | 0.4 [0.3-0.4]            | 2.0 [1.9-2.1]            | 4.5 [4.3-4.7]              |
| Rivaroxaban                       | -                        | 0.5 [0.4-0.5]            | 1.9 [1.8-2.0]            | 4.9 [4.7-5.1]            | 8.3 [8.0-8.6]              |
| Dabigatran                        | 0.1 [0.1-0.1]            | 0.7 [0.7-0.8]            | 1.4 [1.3-1.5]            | 2.0 [1.9-2.1]            | 2.2 [2.1-2.4]              |
| Parenteral anticoagulant          | 0.2 [0.2-0.3]            | 0.3 [0.2-0.3]            | 0.3 [0.2-0.3]            | 0.2 [0.2-0.3]            | 0.2 [0.2-0.3]              |
| <b>Antiplatelet therapy alone</b> | <b>33.7 [33.3-34.0]</b>  | <b>31.2 [30.8-31.5]</b>  | <b>28.2 [27.8-28.5]</b>  | <b>22.8 [22.4-23.1]</b>  | <b>18.3 [17.9-18.7]</b>    |
| <b>No antithrombotic therapy</b>  | <b>15.8 [15.5-16.0]</b>  | <b>15.7 [15.4-16.0]</b>  | <b>14.8 [14.5-15.1]</b>  | <b>15.2 [14.8-15.5]</b>  | <b>15.6 [15.3-16.0]</b>    |

Abbreviations: CI, confidence interval; VKA, vitamin K antagonists

Management of NVAf in Europe and the UK

**Table s3. Proportion of patients with NVAf treated in April 2012, 2013, 2014, and 2015 in the UK, according to country of residence**

|                                   | April 2012<br>% [95% CI] | April 2013<br>% [95% CI] | April 2014<br>% [95% CI] | April 2015<br>% [95% CI] | January 2016<br>% [95% CI] |
|-----------------------------------|--------------------------|--------------------------|--------------------------|--------------------------|----------------------------|
| <b>England</b>                    |                          |                          |                          |                          |                            |
| <b>Anticoagulation treatment</b>  | <b>49.6 [49.2-50]</b>    | <b>52.4 [52-52.9]</b>    | <b>56.9 [56.5-57.4]</b>  | <b>62.1 [61.6-62.5]</b>  | <b>66.5 [66.0-67.1]</b>    |
| VKA                               | 49.2 [48.8-49.6]         | 50.8 [50.4-51.2]         | 52.4 [51.9-52.8]         | 51.3 [50.8-51.8]         | 47.9 [47.4-48.5]           |
| Apixaban                          | -                        | -                        | 0.4 [0.4-0.5]            | 2.3 [2.2-2.5]            | 5.0 [4.8-5.3]              |
| Rivaroxaban                       | -                        | 0.5 [0.4-0.5]            | 2.1 [2.0-2.2]            | 5.7 [5.5-5.9]            | 10.7 [10.3-11.0]           |
| Dabigatran                        | 0.1 [0.1-0.1]            | 0.9 [0.8-1.0]            | 1.7 [1.6-1.8]            | 2.4 [2.3-2.6]            | 2.6 [2.4-2.8]              |
| Parenteral anticoagulant          | 0.3 [0.2-0.3]            | 0.3 [0.2-0.3]            | 0.3 [0.3-0.4]            | 0.3 [0.3-0.4]            | 0.2 [0.2-0.3]              |
| <b>Antiplatelet therapy alone</b> | <b>33.9 [33.5-34.3]</b>  | <b>30.9 [30.6-31.3]</b>  | <b>27.5 [27.1-27.9]</b>  | <b>21.9 [21.4-22.3]</b>  | <b>17.0 [16.5-17.4]</b>    |
| <b>No antithrombotic therapy</b>  | <b>16.5 [16.2-16.8]</b>  | <b>16.6 [16.3-16.9]</b>  | <b>15.6 [15.3-15.9]</b>  | <b>16.1 [15.7-16.4]</b>  | <b>16.5 [16.1-17.0]</b>    |
| <b>Scotland</b>                   |                          |                          |                          |                          |                            |
| <b>Anticoagulation treatment</b>  | <b>48.8 [47.7-49.9]</b>  | <b>51.9 [50.8-53]</b>    | <b>55.5 [54.4-56.6]</b>  | <b>61.8 [60.7-62.9]</b>  | <b>64.3 [63.2-65.4]</b>    |
| VKA                               | 48.2 [47.1-49.3]         | 49.2 [48.1-50.3]         | 49.1 [48.0-50.2]         | 48.4 [47.2-49.5]         | 45.2 [44-46.3]             |
| Apixaban                          | -                        | -                        | 0.5 [0.3-0.6]            | 2.7 [2.3-3.0]            | 6.6 [6.0-7.2]              |
| Rivaroxaban                       | -                        | 1.8 [1.5-2.0]            | 5.0 [4.5-5.4]            | 9.8 [9.1-10.5]           | 11.6 [10.8-12.3]           |
| Dabigatran                        | 0.4 [0.2-0.5]            | 0.5 [0.4-0.7]            | 0.7 [0.5-0.8]            | 0.7 [0.5-0.8]            | 0.8 [0.6-1.0]              |
| Parenteral anticoagulant          | 0.2 [0.1-0.3]            | 0.4 [0.2-0.5]            | 0.3 [0.2-0.4]            | 0.2 [0.1-0.3]            | 0.1 [0.1-0.2]              |
| <b>Antiplatelet therapy alone</b> | <b>37 [35.9-38.1]</b>    | <b>33.6 [32.6-34.7]</b>  | <b>29.6 [28.6-30.6]</b>  | <b>23.2 [22.3-24.2]</b>  | <b>19.9 [19.0-20.8]</b>    |
| <b>No antithrombotic therapy</b>  | <b>14.2 [13.4-15.0]</b>  | <b>14.5 [13.7-15.3]</b>  | <b>14.9 [14.2-15.7]</b>  | <b>15 [14.2-15.8]</b>    | <b>15.8 [14.9-16.6]</b>    |
| <b>Wales</b>                      |                          |                          |                          |                          |                            |
| <b>Anticoagulation treatment</b>  | <b>55.1 [54.0-56.2]</b>  | <b>58.7 [57.7-59.8]</b>  | <b>61.7 [60.6-62.7]</b>  | <b>66.6 [65.5-67.7]</b>  | <b>69.1 [68.0-70.2]</b>    |
| VKA                               | 54.8 [53.7-55.9]         | 57.6 [56.5-58.7]         | 59.1 [58.0-60.1]         | 59.3 [58.1-60.4]         | 57.6 [56.5-58.8]           |
| Apixaban                          | -                        | 0.0 [0.0-0.1]            | 0.3 [0.2-0.4]            | 2.2 [1.9-2.5]            | 3.9 [3.4-4.3]              |
| Rivaroxaban                       | -                        | 0.1 [0.0-0.2]            | 0.9 [0.7-1.1]            | 3.2 [2.8-3.6]            | 5.1 [4.6-5.6]              |
| Dabigatran                        | 0.0 [0.0-0.1]            | 0.9 [0.6-1.1]            | 1.3 [1.1-1.5]            | 1.9 [1.6-2.2]            | 2.3 [2.0-2.7]              |
| Parenteral anticoagulant          | 0.2 [0.1-0.3]            | 0.2 [0.1-0.3]            | 0.1 [0.1-0.2]            | 0.1 [0.0-0.1]            | 0.2 [0.1-0.2]              |
| <b>Antiplatelet therapy alone</b> | <b>32.5 [31.5-33.6]</b>  | <b>29.4 [28.4-30.4]</b>  | <b>26.7 [25.8-27.7]</b>  | <b>20.4 [19.4-21.3]</b>  | <b>16.8 [15.9-17.7]</b>    |
| <b>No antithrombotic therapy</b>  | <b>12.4 [11.6-13.1]</b>  | <b>11.9 [11.2-12.6]</b>  | <b>11.6 [10.9-12.3]</b>  | <b>13.0 [12.2-13.8]</b>  | <b>14.1 [13.3-14.9]</b>    |
| <b>Northern Ireland</b>           |                          |                          |                          |                          |                            |
| <b>Anticoagulation treatment</b>  | <b>51.5 [49.6-53.5]</b>  | <b>55 [53.0-56.9]</b>    | <b>60.8 [59.0-62.7]</b>  | <b>67.3 [65.6-69.0]</b>  | <b>71.9 [70.2-73.6]</b>    |
| VKA                               | 50.7 [48.7-52.7]         | 52.4 [50.4-54.3]         | 51.5 [49.6-53.4]         | 46 [44.2-47.9]           | 39.7 [37.9-41.6]           |
| Apixaban                          | -                        | 0.1 [0.0-0.2]            | 3.1 [2.4-3.7]            | 11.1 [10.0-12.3]         | 19.1 [17.6-20.6]           |
| Rivaroxaban                       | -                        | 0.4 [0.1-0.6]            | 3.5 [2.8-4.2]            | 7.5 [6.5-8.4]            | 10.7 [9.5-11.8]            |
| Dabigatran                        | 0.5 [0.2-0.8]            | 1.6 [1.1-2.1]            | 2.5 [1.9-3.1]            | 2.3 [1.8-2.9]            | 2.1 [1.6-2.7]              |

## Management of NVAf in Europe and the UK

|                                   | April 2012              | April 2013              | April 2014              | April 2015             | January 2016            |
|-----------------------------------|-------------------------|-------------------------|-------------------------|------------------------|-------------------------|
|                                   | % [95% CI]              | % [95% CI]              | % [95% CI]              | % [95% CI]             | % [95% CI]              |
| Parenteral anticoagulant          | 0.3 [0.1-0.5]           | 0.6 [0.3-0.8]           | 0.2 [0.1-0.4]           | 0.3 [0.1-0.6]          | 0.3 [0.1-0.5]           |
| <b>Antiplatelet therapy alone</b> | <b>37.9 [35.9-39.8]</b> | <b>34.1 [32.2-35.9]</b> | <b>28.2 [26.4-29.9]</b> | <b>22 [20.4-23.5]</b>  | <b>17.2 [15.8-18.6]</b> |
| <b>No antithrombotic therapy</b>  | <b>10.6 [9.4-11.8]</b>  | <b>11 [9.8-12.2]</b>    | <b>11.0 [9.8-12.2]</b>  | <b>10.7 [9.6-11.9]</b> | <b>10.9 [9.8-12.1]</b>  |

Abbreviations: CI, confidence interval; VKA, vitamin K antagonists

For peer review only - Highly Confidential

**STROBE 2007 (v4) checklist of items to be included in reports of observational studies in epidemiology\***  
**Checklist for cohort, case-control, and cross-sectional studies (combined)**

| Section/Topic             | Item # | Recommendation                                                                                                                                                                                                                                                                                                                                                                                                                                                         | Reported on page # |
|---------------------------|--------|------------------------------------------------------------------------------------------------------------------------------------------------------------------------------------------------------------------------------------------------------------------------------------------------------------------------------------------------------------------------------------------------------------------------------------------------------------------------|--------------------|
| Title and abstract        | 1      | (a) Indicate the study's design with a commonly used term in the title or the abstract                                                                                                                                                                                                                                                                                                                                                                                 | 2                  |
|                           |        | (b) Provide in the abstract an informative and balanced summary of what was done and what was found                                                                                                                                                                                                                                                                                                                                                                    | 2                  |
| <b>Introduction</b>       |        |                                                                                                                                                                                                                                                                                                                                                                                                                                                                        |                    |
| Background/rationale      | 2      | Explain the scientific background and rationale for the investigation being reported                                                                                                                                                                                                                                                                                                                                                                                   | 4                  |
| Objectives                | 3      | State specific objectives, including any pre-specified hypotheses                                                                                                                                                                                                                                                                                                                                                                                                      | 4                  |
| <b>Methods</b>            |        |                                                                                                                                                                                                                                                                                                                                                                                                                                                                        |                    |
| Study design              | 4      | Present key elements of study design early in the paper                                                                                                                                                                                                                                                                                                                                                                                                                | 4-5                |
| Setting                   | 5      | Describe the setting, locations, and relevant dates, including periods of recruitment, exposure, follow-up, and data collection                                                                                                                                                                                                                                                                                                                                        | 4-5                |
| Participants              | 6      | (a) <i>Cohort study</i> —Give the eligibility criteria, and the sources and methods of selection of participants. Describe methods of follow-up<br><i>Case-control study</i> —Give the eligibility criteria, and the sources and methods of case ascertainment and control selection. Give the rationale for the choice of cases and controls<br><i>Cross-sectional study</i> —Give the eligibility criteria, and the sources and methods of selection of participants | 5                  |
|                           |        | (b) <i>Cohort study</i> —For matched studies, give matching criteria and number of exposed and unexposed<br><i>Case-control study</i> —For matched studies, give matching criteria and the number of controls per case                                                                                                                                                                                                                                                 | n/a                |
| Variables                 | 7      | Clearly define all outcomes, exposures, predictors, potential confounders, and effect modifiers. Give diagnostic criteria, if applicable                                                                                                                                                                                                                                                                                                                               | 5                  |
| Data sources/ measurement | 8*     | For each variable of interest, give sources of data and details of methods of assessment (measurement). Describe comparability of assessment methods if there is more than one group                                                                                                                                                                                                                                                                                   | 4-5                |
| Bias                      | 9      | Describe any efforts to address potential sources of bias                                                                                                                                                                                                                                                                                                                                                                                                              | 6                  |
| Study size                | 10     | Explain how the study size was arrived at                                                                                                                                                                                                                                                                                                                                                                                                                              | 5                  |
| Quantitative variables    | 11     | Explain how quantitative variables were handled in the analyses. If applicable, describe which groupings were chosen and why                                                                                                                                                                                                                                                                                                                                           | 5-6                |
| Statistical methods       | 12     | (a) Describe all statistical methods, including those used to control for confounding                                                                                                                                                                                                                                                                                                                                                                                  | 6                  |
|                           |        | (b) Describe any methods used to examine subgroups and interactions                                                                                                                                                                                                                                                                                                                                                                                                    | n/a                |
|                           |        | (c) Explain how missing data were addressed                                                                                                                                                                                                                                                                                                                                                                                                                            | n/a                |
|                           |        | (d) <i>Cohort study</i> —If applicable, explain how loss to follow-up was addressed<br><i>Case-control study</i> —If applicable, explain how matching of cases and controls was addressed                                                                                                                                                                                                                                                                              |                    |

|                          |     |                                                                                                                                                                                                              |              |
|--------------------------|-----|--------------------------------------------------------------------------------------------------------------------------------------------------------------------------------------------------------------|--------------|
|                          |     | <i>Cross-sectional study</i> —If applicable, describe analytical methods taking account of sampling strategy                                                                                                 |              |
|                          |     | (e) Describe any sensitivity analyses                                                                                                                                                                        | 10           |
| <b>Results</b>           |     |                                                                                                                                                                                                              |              |
| Participants             | 13* | (a) Report numbers of individuals at each stage of study—eg numbers potentially eligible, examined for eligibility, confirmed eligible, included in the study, completing follow-up, and analysed            | 20           |
|                          |     | (b) Give reasons for non-participation at each stage                                                                                                                                                         | 20           |
|                          |     | (c) Consider use of a flow diagram                                                                                                                                                                           | 20           |
| Descriptive data         | 14* | (a) Give characteristics of study participants (eg demographic, clinical, social) and information on exposures and potential confounders                                                                     | 16           |
|                          |     | (b) Indicate number of participants with missing data for each variable of interest                                                                                                                          | 16           |
|                          |     | (c) <i>Cohort study</i> —Summarise follow-up time (eg, average and total amount)                                                                                                                             | n/a          |
| Outcome data             | 15* | <i>Cohort study</i> —Report numbers of outcome events or summary measures over time                                                                                                                          | n/a          |
|                          |     | <i>Case-control study</i> —Report numbers in each exposure category, or summary measures of exposure                                                                                                         | n/a          |
|                          |     | <i>Cross-sectional study</i> —Report numbers of outcome events or summary measures                                                                                                                           | 6, 16, 17-19 |
| Main results             | 16  | (a) Give unadjusted estimates and, if applicable, confounder-adjusted estimates and their precision (eg, 95% confidence interval). Make clear which confounders were adjusted for and why they were included | 17           |
|                          |     | (b) Report category boundaries when continuous variables were categorized                                                                                                                                    | 18-19        |
|                          |     | (c) If relevant, consider translating estimates of relative risk into absolute risk for a meaningful time period                                                                                             | n/a          |
| Other analyses           | 17  | Report other analyses done—eg analyses of subgroups and interactions, and sensitivity analyses                                                                                                               | 10           |
| <b>Discussion</b>        |     |                                                                                                                                                                                                              |              |
| Key results              | 18  | Summarise key results with reference to study objectives                                                                                                                                                     | 8            |
| Limitations              | 19  | Discuss limitations of the study, taking into account sources of potential bias or imprecision. Discuss both direction and magnitude of any potential bias                                                   | 10           |
| Interpretation           | 20  | Give a cautious overall interpretation of results considering objectives, limitations, multiplicity of analyses, results from similar studies, and other relevant evidence                                   | 9-10         |
| Generalisability         | 21  | Discuss the generalisability (external validity) of the study results                                                                                                                                        | 10           |
| <b>Other information</b> |     |                                                                                                                                                                                                              |              |
| Funding                  | 22  | Give the source of funding and the role of the funders for the present study and, if applicable, for the original study on which the present article is based                                                | 1            |

\*Give information separately for cases and controls in case-control studies and, if applicable, for exposed and unexposed groups in cohort and cross-sectional studies.  
**Note:** An Explanation and Elaboration article discusses each checklist item and gives methodological background and published examples of transparent reporting. The STROBE checklist is best used in conjunction with this article (freely available on the Web sites of PLoS Medicine at <http://www.plosmedicine.org/>, Annals of Internal Medicine at <http://www.annals.org/>, and Epidemiology at <http://www.epidem.com/>). Information on the STROBE Initiative is available at [www.strobe-statement.org](http://www.strobe-statement.org).
